# Supplementary material
Source: Royal Society of Chemistry journal article supplement (doi:10.1039/d6ob00223d)
Supplement: d6ob00223d1.pdf [file d6ob00223d1.pdf]

**Access to Arylurazoles Bearing Both Central and C-N Axial Chirality via  
Asymmetric Desymmetrization Catalyzed by Chiral Phosphoric Acid**

Wenhui Wu, Wenkai Li\*, Yongqiang Xu, Yuhang Zhou, Jingping Qu and Baomin Wang\*

State Key Laboratory of Fine Chemicals, Department of Pharmaceutical Engineering, School  
of Chemical Engineering, Dalian University of Technology, Dalian 116024, P. R. China

*E-mail:* lwk2000@mail.dlut.edu.cn; bmwang@dlut.edu.cn

**Contents**

|                                                                            |     |
|----------------------------------------------------------------------------|-----|
| 1. General information .....                                               | S1  |
| 2. Experimental procedures of compounds <b>2</b> .....                     | S2  |
| 3. Experimental procedures and characterization of compound <b>3</b> ..... | S3  |
| Gram scale synthesis of the product <b>3xa</b> .....                       | S41 |
| Synthesis of the products <b>4</b> .....                                   | S41 |
| 4. The racemization experiment .....                                       | S49 |
| 5. References .....                                                        | S50 |
| 6. NMR spectra copies .....                                                | S51 |
| 7. X-ray crystal structure of <b>3xa</b> . .....                           | S85 |

## 1. General information

Unless otherwise noted, materials were purchased from commercial suppliers and used without further purification. Column chromatography was performed on silica gel (200~300 mesh). Enantiomeric excesses (ee) were determined by HPLC using corresponding commercial chiral columns as stated at 30 °C with UV detector at 254 nm. Optical rotations were reported as follows:  $[\alpha]_D^T$  (*c* g/100 mL, solvent). All <sup>1</sup>H NMR spectra were recorded on Bruker Avance II 400 MHz or Bruker Avance III 500 MHz, <sup>13</sup>C NMR spectra were recorded on Bruker Avance II 101 MHz, <sup>19</sup>F NMR spectra were recorded on Bruker Avance II 377 MHz with chemical shifts reported as ppm (in CDCl<sub>3</sub> or DMSO-*d*<sub>6</sub>, TMS as an internal standard). Data for <sup>1</sup>H NMR are recorded as follows: chemical shift (δ, ppm), multiplicity (s = singlet, d = doublet, t = triplet, m = multiplet, br = broad singlet, dd = double doublet, ddd = doublet of doublet of doublets, dt = doublet of triplets, coupling constants in Hz, integration). HRMS (ESI) was obtained with a HRMS/MS instrument (LTQ Orbitrap XL TM). The absolute configuration of **3xa** was assigned by the X-ray analysis.

Allyl pyrazolones **1** were prepared according to literature methods<sup>1</sup>.

## 2. Experimental procedures of compounds 2<sup>2</sup>

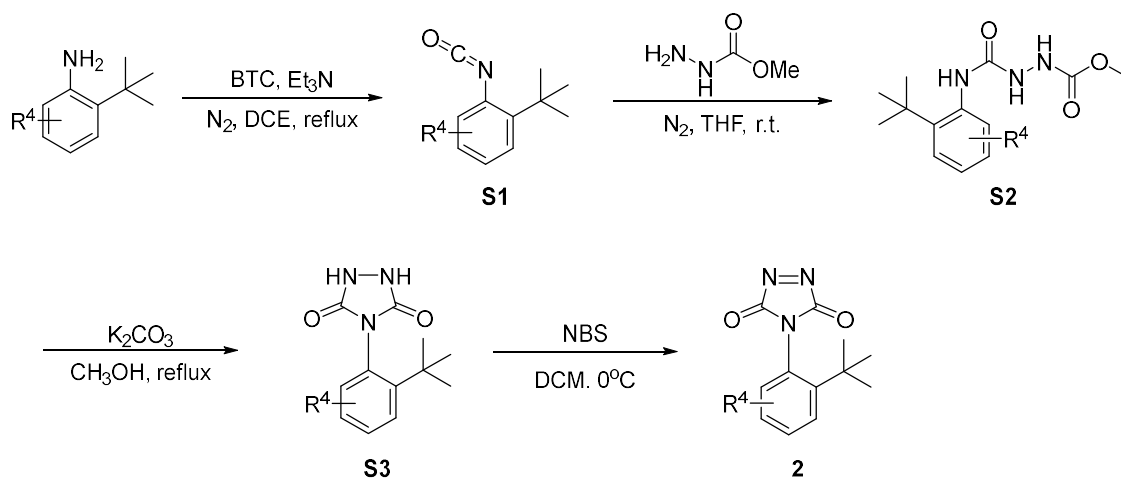

Aryl isocyanate **S1**: Et<sub>3</sub>N (0.03 mL, 0.01 equiv) was added to a stirring solution of triphosgene (2.97 g, 10.0 mmol, 0.5 equiv) in dry DCE (50 mL) at 0 °C. After stirring 5 minutes, aromatic amine (20.0 mmol) in dry DCE (50 mL) was added slowly over 2 h. The reaction mixture was then refluxed and stirred under nitrogen for 4 h. After cooling to room temperature, the mixture was evaporated under reduced pressure to afford **S1** as a yellow liquid.

4-Ar-1-carbethoxysemicarbazide **S2**: To a solution of methyl carbazate (1.8 g, 20.0 mmol) in anhydrous THF under argon atmosphere, aryl isocyanate **S1** (20.0 mmol, 1.0 equiv.) was added over 1-2 minutes. The resulting mixture was stirred at room temperature for 1 h. After the reaction completion (monitored by TLC), the white solid product was collected by filtration or by simple evaporation to dryness.

4-Ar-urazole **S3**: To a solution of intermediate **S2** in methanol, potassium carboxylate (2.0 equiv.) was added and the reaction mixture was refluxed overnight. After the reaction completion (monitored by TLC), the resulting mixture was condensed and re-dissolved with small amount of water. The pH of resulting mixture was adjusted to the range of 3~4 with the drop-wise addition of 1N aqueous HCl. The desired product **S3** was collected by simple filtration and washed with cold deionized water prior to drying.

4-aryl-1,2,4-triazoline-3,5-diones **2**: *N*-Bromosuccinimide (20 mmol) was added to an ice-cold suspension of urazoles (10 mmol) in 150 mL of CH<sub>2</sub>Cl<sub>2</sub>. After being stirred for 30 min, the resulting red solution was extracted five times with water. The CH<sub>2</sub>Cl<sub>2</sub> layer was then dried over MgSO<sub>4</sub>, filtered, and concentrated under reduced pressure. Purple or dark red solid of various triazolinediones were obtained.

### 3. Experimental procedures and characterization of compound 3

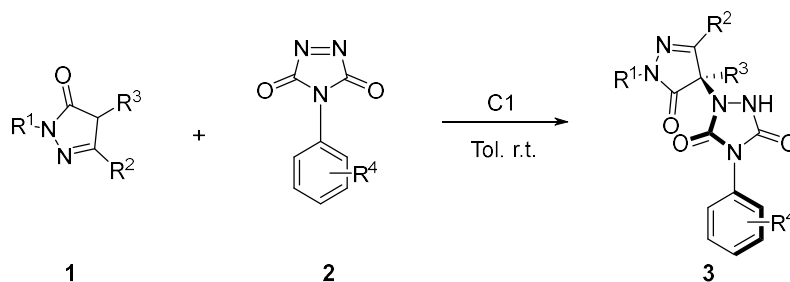

To a tube charged with compound **1** (0.2 mmol), **C1** (0.01 mmol) followed with Tol (2 mL), compound **2** (0.24 mmol) were then added in one portion. The reaction mixture was stirred at 25 °C for 0.2 hours. When compound **1** was consumed as checked by TLC, then the reaction was stopped and purified by column chromatography on silica gel directly to give the product **3**.

#### 1-(4-benzyl-5-oxo-1,3-diphenyl-4,5-dihydro-1H-pyrazol-4-yl)-4-(2-(tert-butyl)phenyl)-1,2,4-triazolidine-3,5-dion (**3aa**)

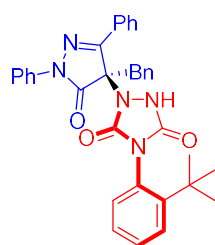

**3aa**

White solid, mp 131-133 °C, 80% yield, 98% ee, dr = 13:1.  $[\alpha]_D^{25} = -1.205$  (c = 0.2, CH<sub>2</sub>Cl<sub>2</sub>). <sup>1</sup>H NMR (400 MHz, CDCl<sub>3</sub>) δ 8.33 (s, 1H), 8.10 - 8.03 (m, 2H), 7.57 - 7.45 (m, 6H), 7.39 - 7.34 (m, 1H), 7.31 - 7.27 (m, 2H), 7.23 (dd, *J* = 7.5, 1.5 Hz, 1H), 7.20 - 7.04 (m, 4H), 6.98 (ddd, *J* = 11.2, 8.1, 1.6 Hz, 3H), 4.01 - 3.84 (m, 2H), 1.16 (s, 9H). <sup>13</sup>C NMR (101 MHz, CDCl<sub>3</sub>) δ 170.0, 156.1, 153.3, 152.6, 148.9, 136.6, 132.5, 131.4, 130.5, 130.0, 128.8, 128.6, 128.6, 128.3, 128.3, 128.2, 128.1, 127.7, 126.4, 125.5, 120.4, 71.7, 39.6, 35.3, 31.3. HRMS (ESI) *m/z*: [M + Na]<sup>+</sup>

Calcd for C<sub>34</sub>H<sub>31</sub>N<sub>5</sub>NaO<sub>3</sub>, 580.2325; Found 580.2316. The enantiomeric ratio was determined by HPLC analysis on a chiral AD-H column. *n*-Hexane/*i*-PrOH = 7:3, flow rate = 0.8 mL/min., λ = 240 nm, *t<sub>R</sub>* = 8.3 min. (minor), 5.5 min. (major).

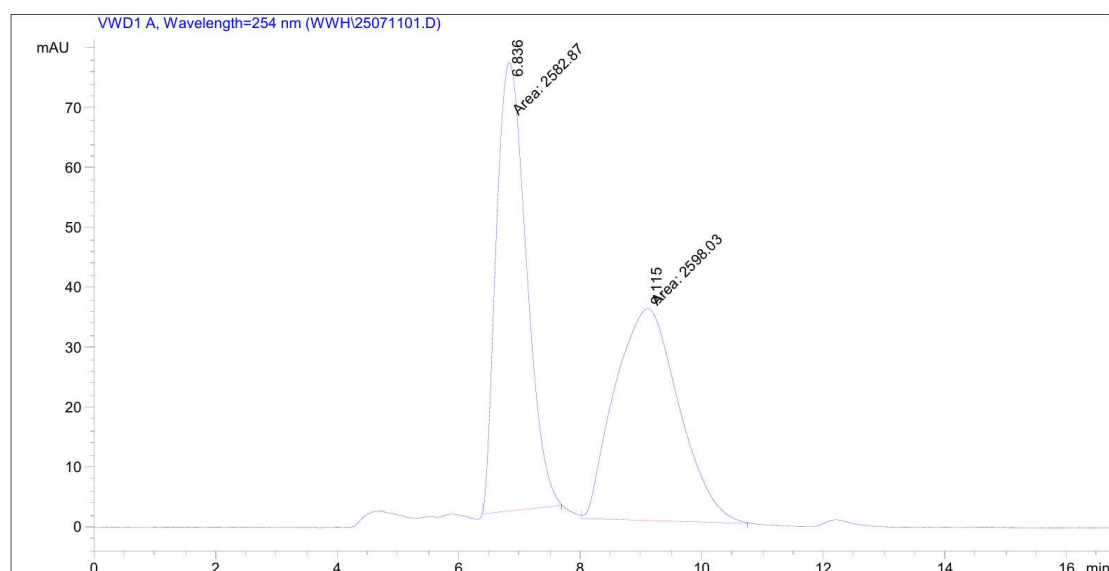

| Peak # | RetTime [min] | Type | Width [min] | Area mAU *s | Height [mAU] | Area %  |
|--------|---------------|------|-------------|-------------|--------------|---------|
| 1      | 6.836         | MM   | 0.5744      | 2582.87451  | 74.94954     | 49.8537 |
| 2      | 9.115         | MM   | 1.2221      | 2598.03198  | 35.43270     | 50.1463 |

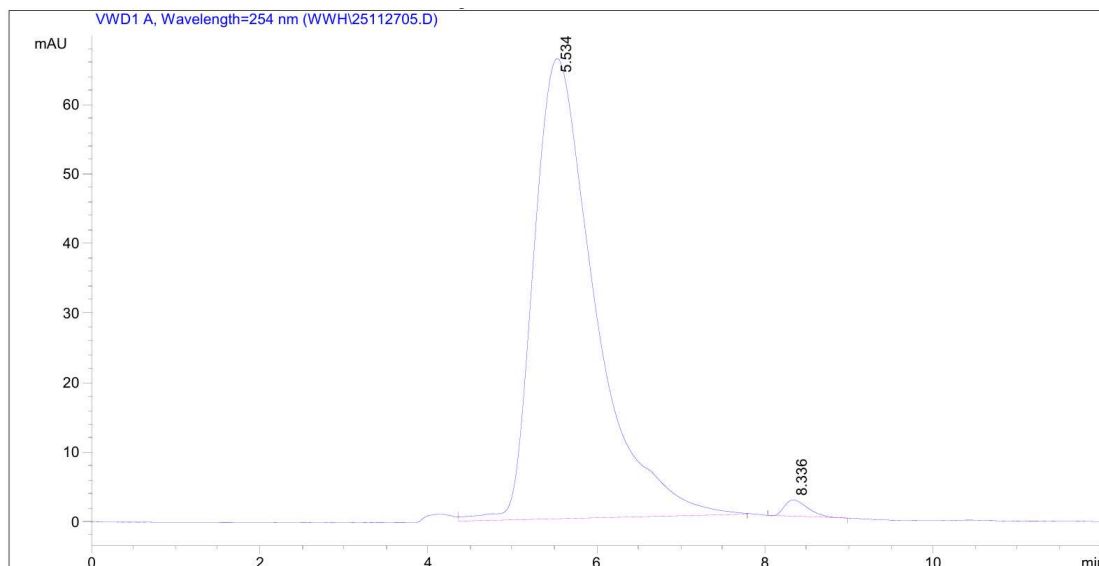

| Peak # | RetTime [min] | Type | Width [min] | Area mAU *s | Height [mAU] | Area %  |
|--------|---------------|------|-------------|-------------|--------------|---------|
| 1      | 5.534         | VB   | 0.7492      | 3333.26831  | 66.18851     | 98.6511 |
| 2      | 8.336         | PB   | 0.2954      | 45.57866    | 2.34242      | 1.3489  |

**1-(4-benzyl-1-(2-fluorophenyl)-5-oxo-3-phenyl-4,5-dihydro-1H-pyrazol-4-yl)-4-(2-(tert-butyl)phenyl)-1,2,4-triazolidine-3,5-dione (3ba)**

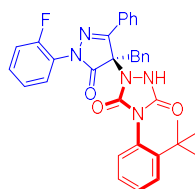

**3ba**

White solid, mp 174-1176 °C, 87% yield, 98% ee, dr = 13:1.  $[\alpha]_D^{25} = +1.835$  (c = 0.4, CH<sub>2</sub>Cl<sub>2</sub>). <sup>1</sup>H NMR (400 MHz, CDCl<sub>3</sub>) δ 8.09 - 8.06 (m, 2H), 7.53 (dd, *J* = 11.8, 7.2 Hz, 4H), 7.43 - 7.34 (m, 1H), 7.34 - 6.98 (m, 12H), 3.88 (d, *J* = 5.7 Hz, 2H), 1.13 (s, 9H). <sup>13</sup>C NMR (101 MHz, CDCl<sub>3</sub>) δ 170.6, 154.7 (d, *J* = 243.6 Hz), 153.3, 149.2, 135.7, 133.5, 131.5, 131.5, 131.1, 130.7, 130.6, 130.3, 130.2, 129.7, 129.3, 129.0, 128.6 (d, *J* = 8.5 Hz), 128.5, 128.1 (d, *J* = 17.7 Hz), 127.6 (d, *J* = 2.6 Hz), 126.7, 121.9 (d, *J* = 28.9 Hz), 121.1, 116.4 (d, *J* = 24.1 Hz), 71.1, 39.1, 35.3, 31.2. <sup>19</sup>F NMR (377 MHz, CDCl<sub>3</sub>) δ -117.78. HRMS (ESI) *m/z*: [M + Na]<sup>+</sup> Calcd for C<sub>34</sub>H<sub>30</sub>FN<sub>5</sub>NaO<sub>3</sub>, 598.2230; Found 598.2223. The enantiomeric ratio was determined by HPLC analysis on a chiral AD-H column. *n*-Hexane/*i*-PrOH = 8:2, flow rate = 0.8 mL/min., λ = 254 nm, *t*<sub>R</sub> = 6.7 min. (minor), 8.2 min. (major).

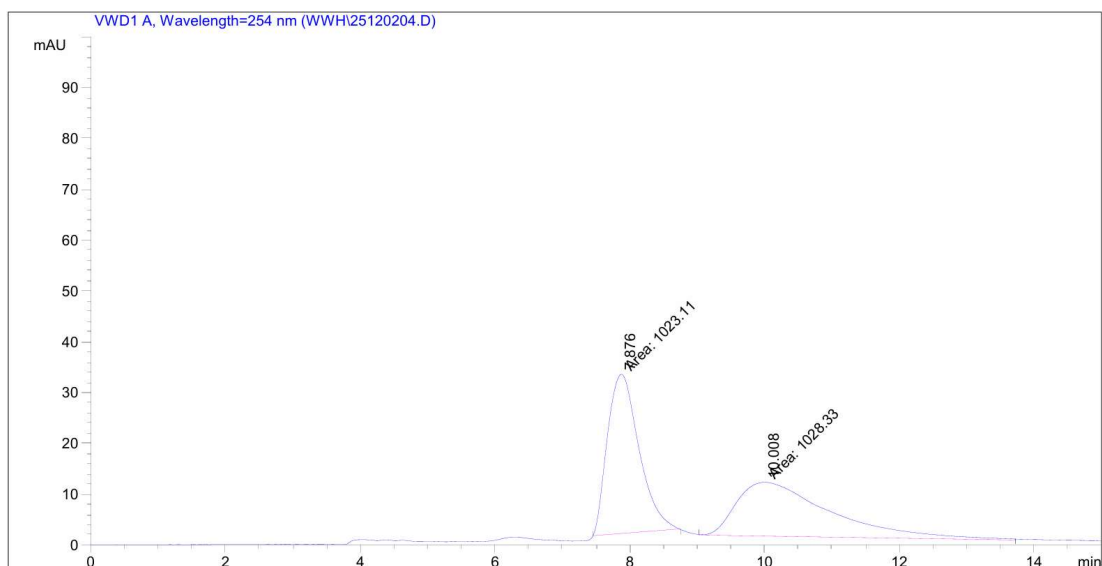

| Peak # | RetTime [min] | Type | Width [min] | Area mAU * s | Height [mAU] | Area %  |
|--------|---------------|------|-------------|--------------|--------------|---------|
| 1      | 7.876         | MM   | 0.5439      | 1023.10980   | 31.34987     | 49.8726 |
| 2      | 10.008        | MM   | 1.6155      | 1028.33496   | 10.60889     | 50.1274 |

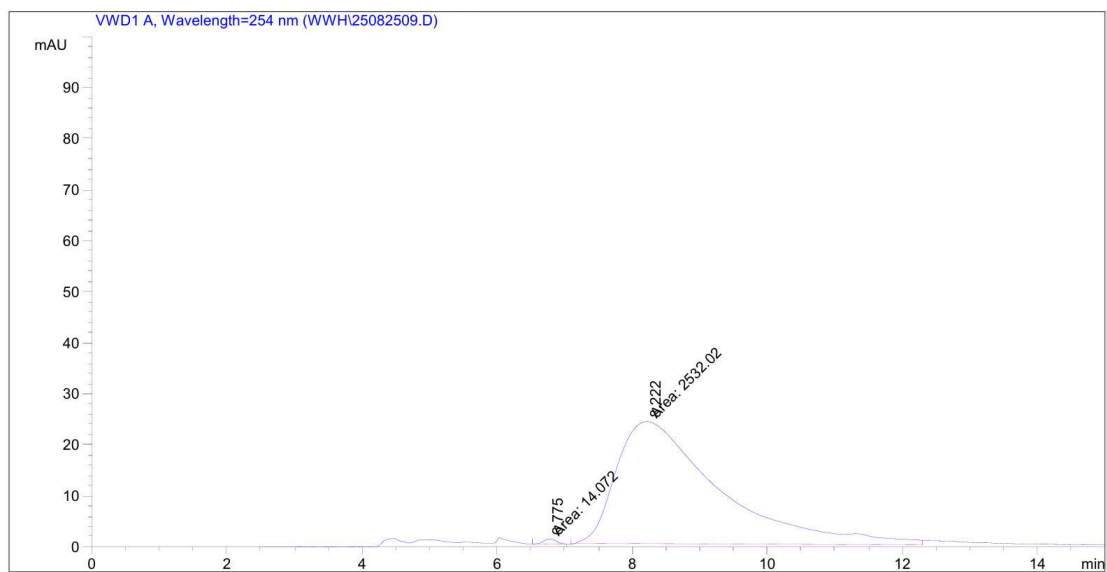

| Peak # | RetTime [min] | Type | Width [min] | Area mAU * s | Height [mAU] | Area %  |
|--------|---------------|------|-------------|--------------|--------------|---------|
| 1      | 6.775         | MM   | 0.2269      | 14.07197     | 1.03359      | 0.5527  |
| 2      | 8.222         | MM   | 1.7654      | 2532.01978   | 23.90362     | 99.4473 |

**1-(4-benzyl-1-(2-bromophenyl)-5-oxo-3-phenyl-4,5-dihydro-1H-pyrazol-4-yl)-4-(2-(tert-butyl)phenyl)-1,2,4-triazolidine-3,5-dion (3ca)**

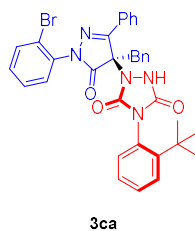

White solid, mp 160-162 °C, 70% yield, > 99% ee, dr = 14:1.  $[\alpha]_D^{25} = -0.855$  ( $c = 0.1$ ,  $\text{CH}_2\text{Cl}_2$ ).  $^1\text{H NMR}$  (400 MHz,  $\text{CDCl}_3$ )  $\delta$  9.09 (s, 1H), 8.08 -8.02 (m, 2H), 7.56 -7.42 (m, 5H), 7.36 (ddd,  $J = 10.2, 5.8, 2.1$  Hz, 1H), 7.25 - 7.12 (m, 6H), 7.08 -6.93 (m, 4H), 3.88 (d,  $J = 6.9$  Hz, 2H), 1.12 (s, 9H)  $^{13}\text{C NMR}$  (101 MHz,  $\text{CDCl}_3$ )  $\delta$  169.1, 156.0, 153.4, 150.1, 149.1, 136.6, 133.5, 131.4, 130.4, 130.1, 130.0, 129.9, 129.7, 129.0, 128.7, 128.6, 128.4, 128.2, 128.1, 127.8, 127.6, 126.3, 120.5, 72.0, 39.7, 35.3, 31.1. HRMS (ESI)  $m/z$ :  $[\text{M} + \text{Na}]^+$  Calcd for  $\text{C}_{34}\text{H}_{30}\text{BrN}_5\text{NaO}_3$ , 658.1430; Found 658.1423. The enantiomeric ratio was determined by HPLC analysis on a chiral AD-H column.  $n$ -Hexane/ $i$ -PrOH = 7:3, flow rate = 0.8 mL/min.,  $\lambda = 254$  nm,  $t_R = 11.3$  min. (major).

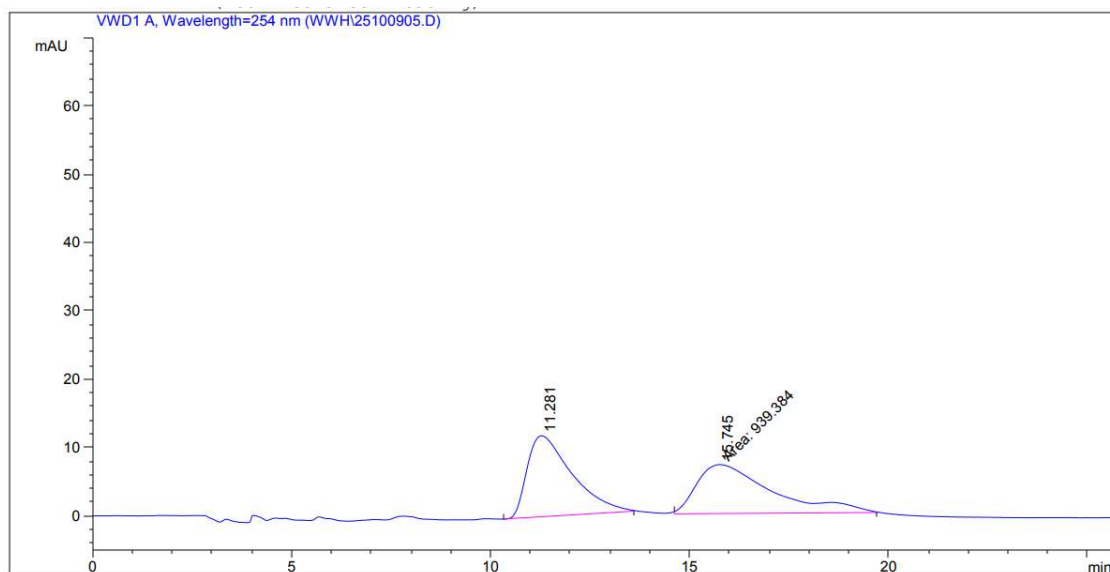

| Peak # | RetTime [min] | Type | Width [min] | Area mAU*s | Height [mAU] | Area %  |
|--------|---------------|------|-------------|------------|--------------|---------|
| 1      | 11.281        | PB   | 1.0551      | 928.00977  | 11.86554     | 49.6954 |
| 2      | 15.745        | MM   | 2.1856      | 939.38409  | 7.16353      | 50.3046 |

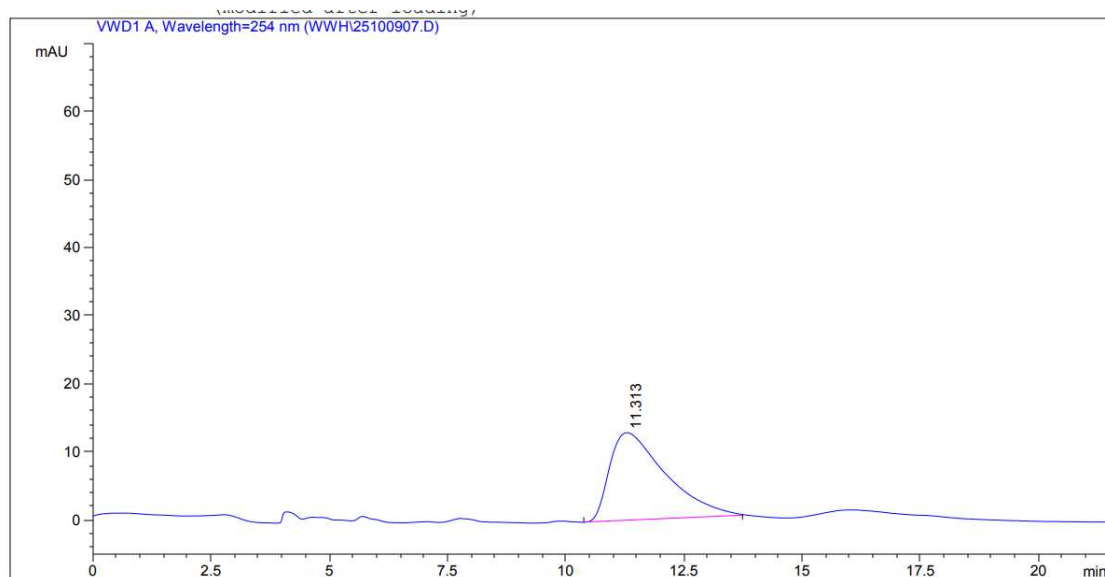

| Peak # | RetTime [min] | Type | Width [min] | Area mAU *s | Height [mAU] | Area %   |
|--------|---------------|------|-------------|-------------|--------------|----------|
| 1      | 11.313        | PB   | 0.9779      | 1059.08801  | 12.86499     | 100.0000 |

**1-(4-benzyl-5-oxo-3-phenyl-1-(*o*-tolyl)-4,5-dihydro-1*H*-pyrazol-4-yl)-4-(2-(*tert*-butyl)phenyl)-1,2,4-triazolidine-3,5-dione (3da)**

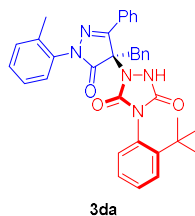

White solid, mp 163-165 °C, 68% yield, > 99% ee, dr = 10:1.  $[\alpha]_D^{25} = -1.389$  (c = 0.1, CH<sub>2</sub>Cl<sub>2</sub>). <sup>1</sup>H NMR (400 MHz, CDCl<sub>3</sub>) δ 8.00 -7.92 (m, 2H), 7.51 (ddd, *J* = 8.2, 3.6, 1.4 Hz, 3H), 7.37 (ddd, *J* = 8.1, 6.0, 1.5 Hz, 1H), 7.31 - 7.27 (m, 5H), 7.17 - 7.05 (m, 5H), 6.98 (ddd, *J* = 11.9, 7.3, 1.6 Hz, 3H), 3.98 (d, *J* = 12.6 Hz, 1H), 3.94 -3.82 (m, 1H), 2.46 (s, 3H), 1.17 (s, 9H). <sup>13</sup>C NMR (101 MHz, CDCl<sub>3</sub>) δ 169.9, 155.8, 153.5, 149.2, 141.6, 136.9, 131.4, 130.4, 130.4, 130.1, 130.0, 128.7, 128.6, 128.3, 128.1, 127.5, 126.9, 126.6, 126.1, 120.2, 39.6, 35.4, 31.3, 21.7. HRMS (ESI) *m/z*: [M + Na]<sup>+</sup> Calcd for C<sub>35</sub>H<sub>33</sub>N<sub>5</sub>NaO<sub>3</sub>, 594.2481; Found 594.2473. The enantiomeric ratio was determined by HPLC analysis on a chiral AD-H column. *n*-Hexane/*i*-PrOH = 8:2, flow rate = 0.8 mL/min., λ = 254 nm, t<sub>R</sub> = 7.4 min. (major).

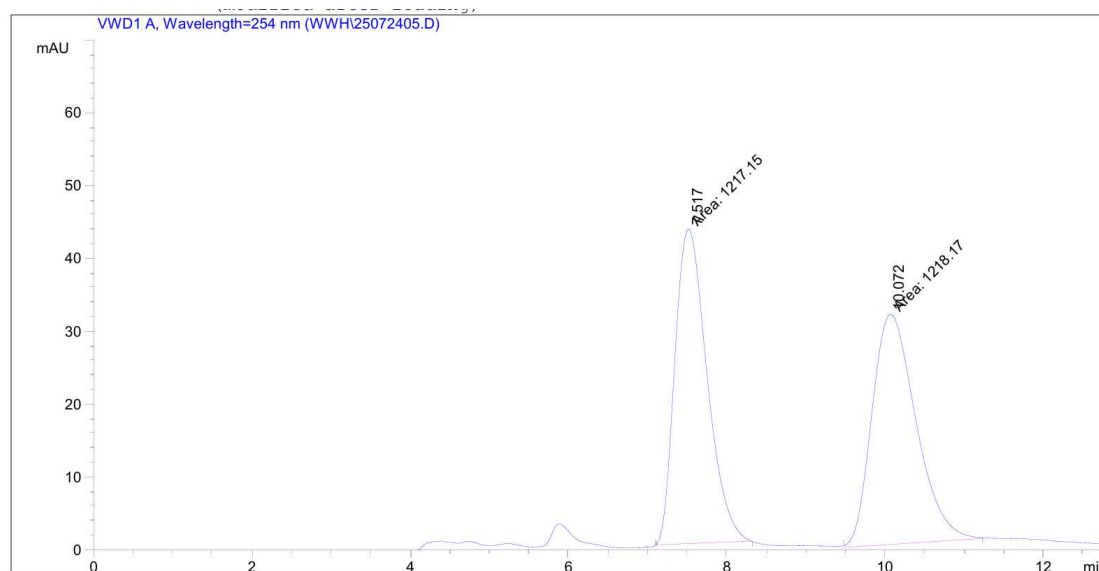

| Peak # | RetTime [min] | Type | Width [min] | Area mAU *s | Height [mAU] | Area %  |
|--------|---------------|------|-------------|-------------|--------------|---------|
| 1      | 7.517         | MM   | 0.4699      | 1217.15259  | 43.17379     | 49.9792 |
| 2      | 10.072        | MM   | 0.6424      | 1218.16614  | 31.60362     | 50.0208 |

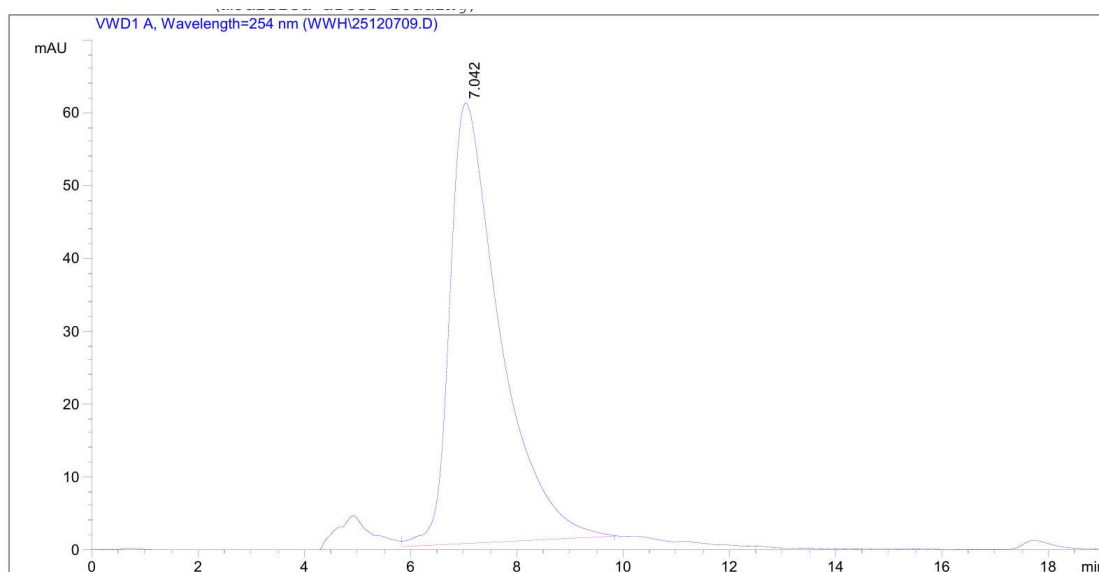

| Peak # | RetTime [min] | Type | Width [min] | Area mAU * s | Height [mAU] | Area %   |
|--------|---------------|------|-------------|--------------|--------------|----------|
| 1      | 7.042         | VB   | 0.9541      | 3972.41772   | 60.48380     | 100.0000 |

**1-(4-benzyl-1-(3-bromophenyl)-5-oxo-3-phenyl-4,5-dihydro-1H-pyrazol-4-yl)-4-(2-(tert-butyl)phenyl)-1,2,4-triazolidine-3,5-dione (3ea)**

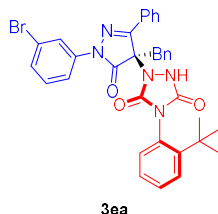

White solid, mp 163-165 °C, 71% yield, 98% ee, dr = 10:1.  $[\alpha]_D^{25} = +14.921$  (c = 0.1, CH<sub>2</sub>Cl<sub>2</sub>). <sup>1</sup>H NMR (400 MHz, CDCl<sub>3</sub>) δ 8.09 - 8.02 (m, 2H), 7.71 - 7.69 (m, 1H), 7.58 (dd, *J* = 8.2, 2.1 Hz, 1H), 7.55 - 7.43 (m, 4H), 7.41 - 7.27 (m, 2H), 7.24 - 6.98 (m, 7H), 6.90 (d, *J* = 7.5 Hz, 2H), 3.87 - 3.77 (m, 2H), 1.10 (d, *J* = 3.3 Hz, 9H). <sup>13</sup>C NMR (101 MHz, CDCl<sub>3</sub>) δ 169.2, 156.1, 153.4, 150.1, 149.1, 136.6, 133.5, 131.5, 130.4, 130.1, 130.0, 129.8, 129.7, 129.0, 128.7, 128.5, 128.4, 128.2, 128.1, 127.6, 126.3, 120.6, 107.1, 100.0, 71.9, 39.7, 35.3, 31.1. HRMS (ESI) *m/z*: [M + Na]<sup>+</sup> Calcd for C<sub>34</sub>H<sub>30</sub>BrN<sub>5</sub>NaO<sub>3</sub>, 658.1430; Found 658.1418. The enantiomeric ratio was determined by HPLC analysis on a chiral AD-H column. *n*-Hexane/*i*-PrOH = 15:2, flow rate = 0.8 mL/min., λ = 254 nm, *t<sub>R</sub>* = 15.2 min. (minor), 18.7 min. (major).

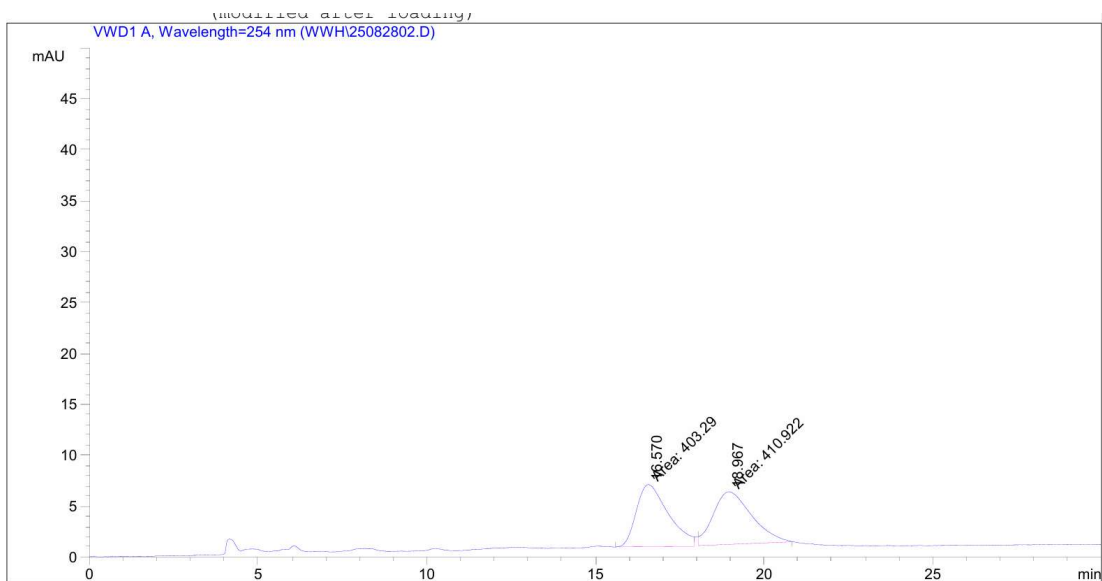

| Peak # | RetTime [min] | Type | Width [min] | Area mAU *s | Height [mAU] | Area %  |
|--------|---------------|------|-------------|-------------|--------------|---------|
| 1      | 16.570        | MM   | 1.1019      | 403.29037   | 6.09982      | 49.5314 |
| 2      | 18.967        | MM   | 1.3226      | 410.92160   | 5.17820      | 50.4686 |

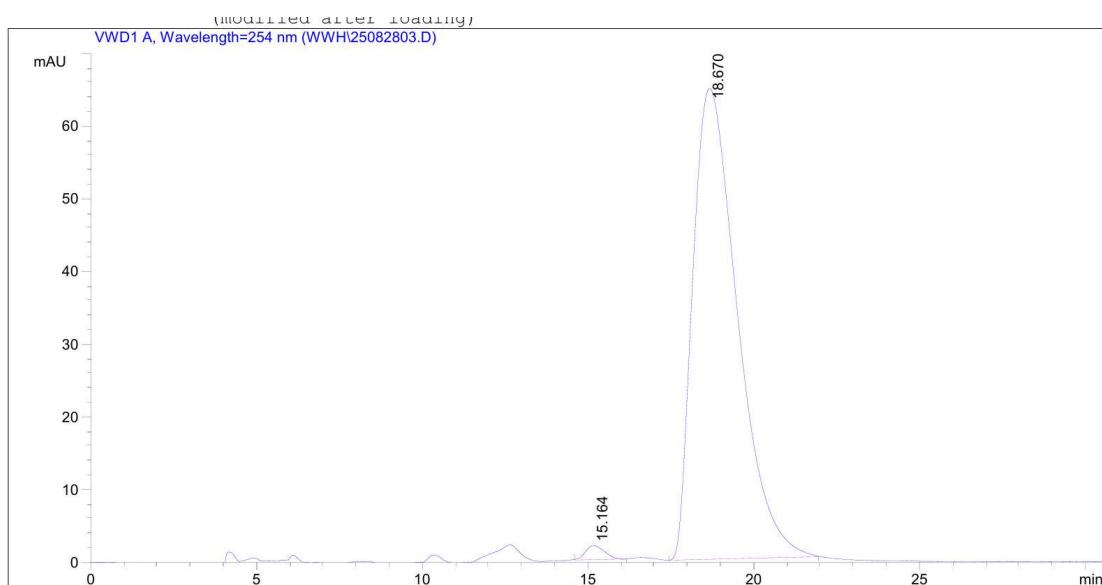

| Peak # | RetTime [min] | Type | Width [min] | Area mAU *s | Height [mAU] | Area %  |
|--------|---------------|------|-------------|-------------|--------------|---------|
| 1      | 15.164        | BP   | 0.4840      | 76.95125    | 1.96088      | 1.2574  |
| 2      | 18.670        | PB   | 1.3772      | 6042.91602  | 64.74623     | 98.7426 |

**1-(4-benzyl-5-oxo-3-phenyl-1-(m-tolyl)-4,5-dihydro-1H-pyrazol-4-yl)-4-(2-(tert-butyl)phenyl)-1,2,4-triazolidine-3,5-dion (3fa)**

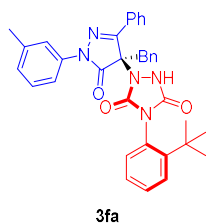

White solid, mp 170-172 °C, 76% yield, 96% ee, dr = 12:1.  $[\alpha]_D^{25} = +12.871$  (c = 0.1, CH<sub>2</sub>Cl<sub>2</sub>). <sup>1</sup>H NMR (400 MHz, CDCl<sub>3</sub>) δ 8.12 -8.03 (m, 2H), 7.56 -7.43 (m, 4H), 7.39 -7.07 (m, 9H), 7.07 -6.90 (m, 4H), 3.96 -3.81 (m, 2H), 2.29 (s, 3H), 1.13 (s, 9H). <sup>13</sup>C NMR (101 MHz, CDCl<sub>3</sub>) δ 170.0, 156.0, 153.4, 153.1, 149.1, 138.7, 136.7, 131.5, 131.0, 130.3, 130.1, 129.7, 129.2, 128.5, 128.4, 128.3, 128.2, 127.5, 127.1, 126.7, 121.1, 117.7, 72.0, 39.6, 35.3, 31.2, 21.4. HRMS (ESI) m/z: [M + Na]<sup>+</sup> Calcd for C<sub>35</sub>H<sub>33</sub>N<sub>5</sub>NaO<sub>3</sub>, 594.2481; Found 594.2476. The enantiomeric ratio was determined by HPLC analysis on a chiral AD-H column. *n*-Hexane/*i*-PrOH = 15:2, flow rate = 0.8 mL/min., λ = 232 nm, t<sub>R</sub> = 14.5 min. (minor), 18.3 min. (major).

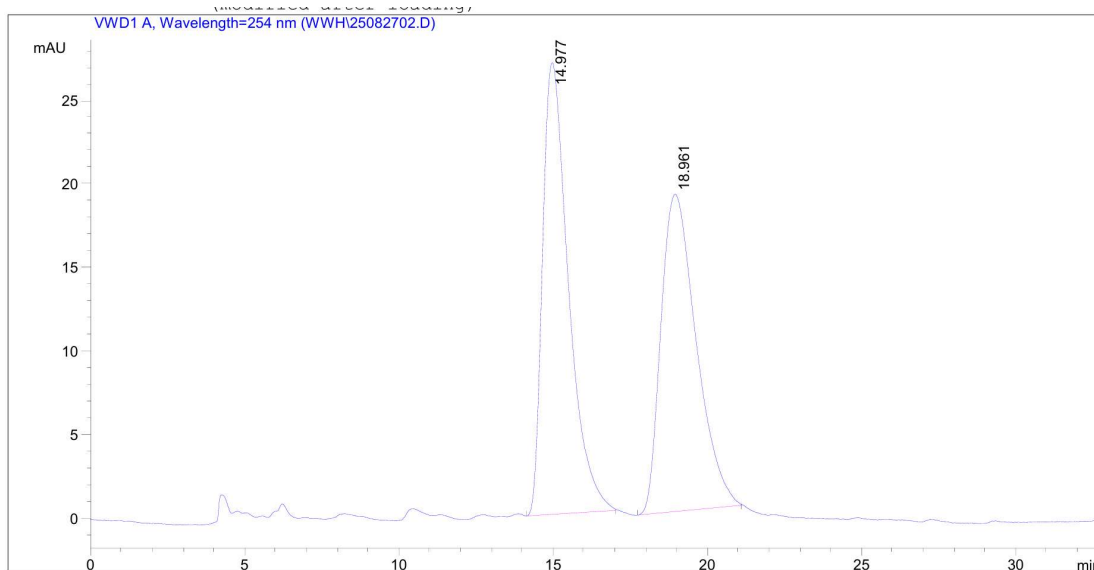

| Peak # | RetTime [min] | Type | Width [min] | Area mAU *s | Height [mAU] | Area %  |
|--------|---------------|------|-------------|-------------|--------------|---------|
| 1      | 14.977        | PB   | 0.8462      | 1577.65479  | 27.00233     | 49.8309 |
| 2      | 18.961        | MM   | 1.3750      | 1588.36145  | 19.25307     | 50.1691 |

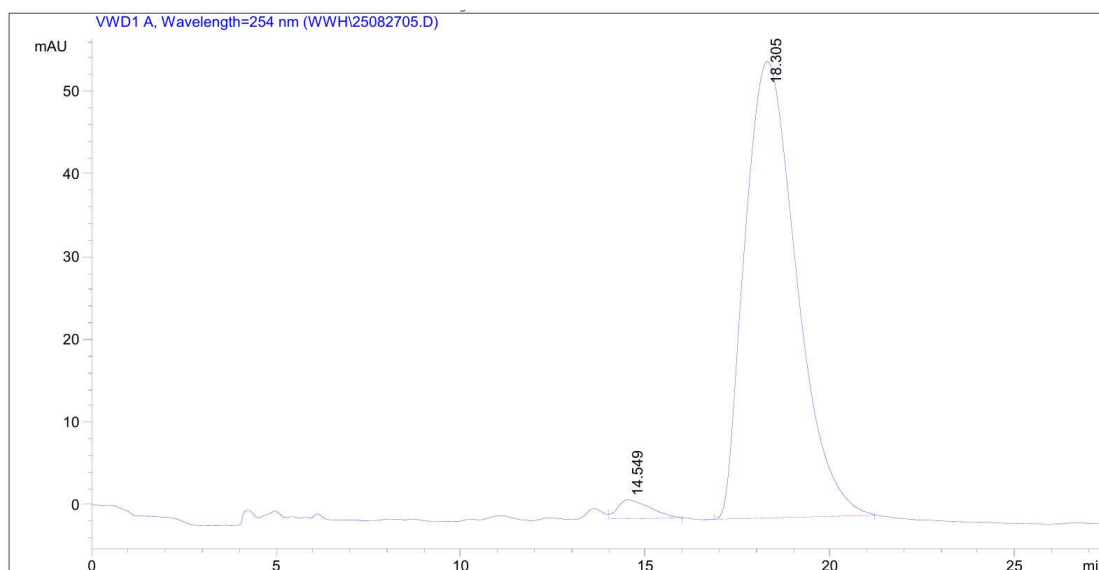

| Peak # | RetTime [min] | Type | Width [min] | Area mAU *s | Height [mAU] | Area %  |
|--------|---------------|------|-------------|-------------|--------------|---------|
| 1      | 14.549        | VB   | 0.7331      | 141.56720   | 2.28457      | 2.5724  |
| 2      | 18.305        | BB   | 1.4263      | 5361.66504  | 55.18008     | 97.4276 |

**1-(4-benzyl-1-(3-methoxyphenyl)-5-oxo-3-phenyl-4,5-dihydro-1H-pyrazol-4-yl)-4-(2-(tert-butyl)phenyl)-1,2,4-triazolidine-3,5-dione (3ga)**

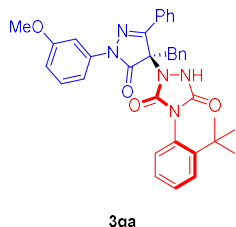

White solid, mp 159-161 °C, 87% yield, > 99% ee, dr = 12:1.  $[\alpha]_D^{25} = +0.645$  (c = 0.3, CH<sub>2</sub>Cl<sub>2</sub>). <sup>1</sup>H NMR (400 MHz, CDCl<sub>3</sub>) δ 9.21 (s, 1H), 8.10 -8.02 (m, 2H), 7.48 (ddd, *J* = 9.7, 7.3, 5.4 Hz, 4H), 7.37 - 7.33 (m, 1H), 7.24 -6.99 (m, 8H), 6.97 -6.87 (m, 2H), 6.99 - 6.73 (m, 1H), 3.92 (dd, *J* = 12.5, 1.9 Hz, 1H), 3.84 (d, *J* = 12.5 Hz, 1H), 3.75 (s, 3H), 1.14 (s, 9H). <sup>13</sup>C NMR (101 MHz, Chloroform-*d*) δ 159.8, 153.2, 137.9, 131.5, 131.1, 130.3, 130.1, 129.6, 129.5, 129.2, 128.5, 128.4, 128.3, 128.2, 127.5, 126.7, 112.6, 112.1, 105.9, 72.1, 55.4, 39.7, 35.3, 31.2. HRMS (ESI) *m/z*: [M + Na]<sup>+</sup> Calcd for C<sub>35</sub>H<sub>33</sub>N<sub>5</sub>NaO<sub>4</sub>, 610.2430; Found 610.2421. The enantiomeric ratio was determined by HPLC analysis on a chiral AD-H column. *n*-Hexane/*i*-PrOH = 7:3, flow rate = 0.8 mL/min., λ = 232 nm, t<sub>R</sub> = 7.5 min. (major).

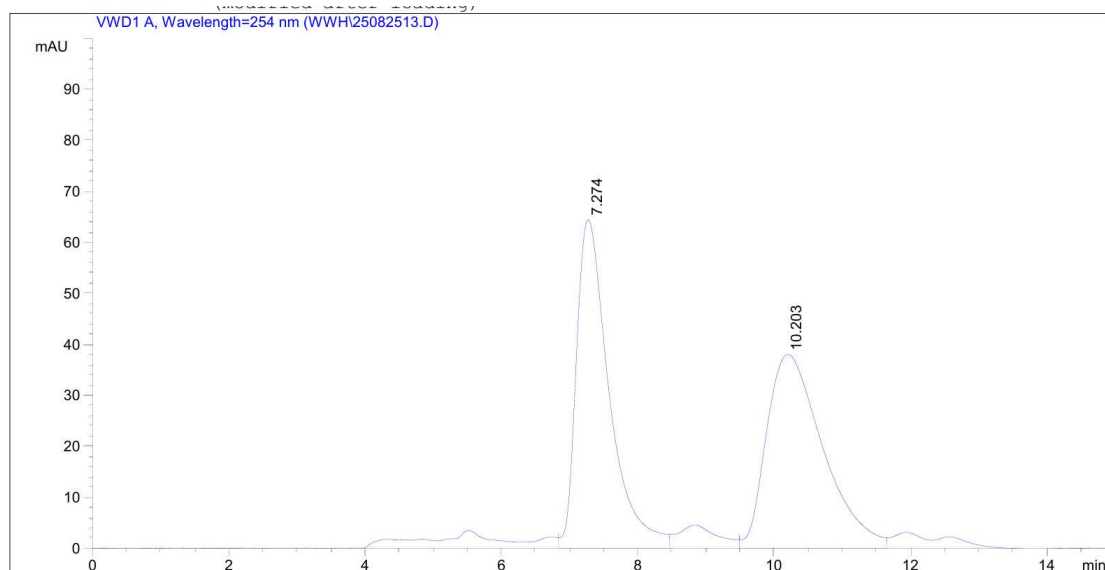

| Peak # | RetTime [min] | Type | Width [min] | Area mAU *s | Height [mAU] | Area %  |
|--------|---------------|------|-------------|-------------|--------------|---------|
| 1      | 7.274         | VB   | 0.5005      | 2153.91577  | 64.45762     | 49.5814 |
| 2      | 10.203        | VV   | 0.8657      | 2190.28320  | 38.02136     | 50.4186 |

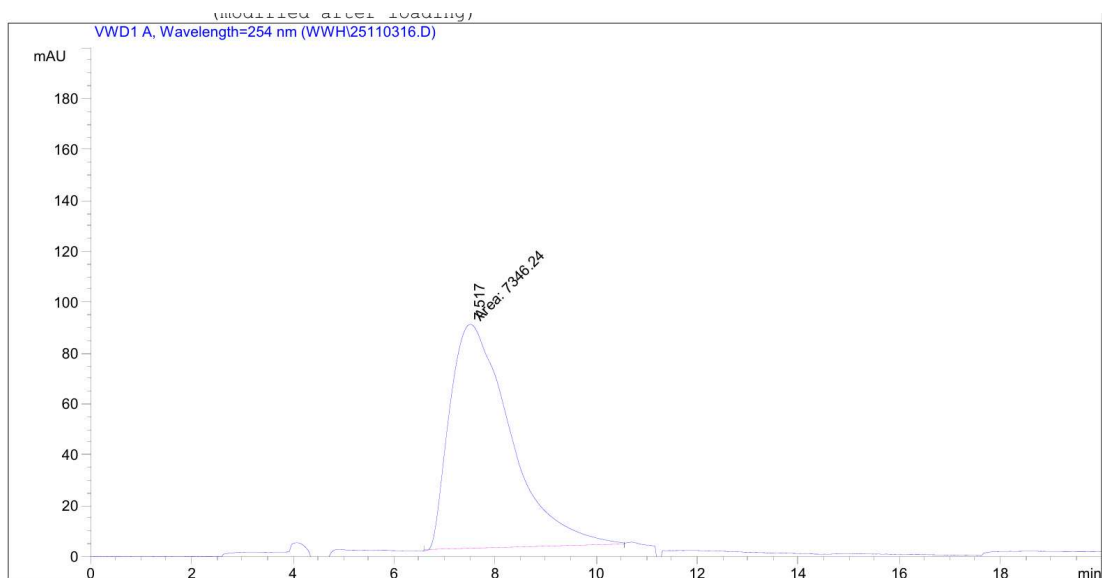

| Peak # | RetTime [min] | Type | Width [min] | Area mAU *s | Height [mAU] | Area %   |
|--------|---------------|------|-------------|-------------|--------------|----------|
| 1      | 7.517         | MM   | 1.3903      | 7346.24219  | 88.06552     | 100.0000 |

**1-(4-benzyl-1-(4-chlorophenyl)-5-oxo-3-phenyl-4,5-dihydro-1H-pyrazol-4-yl)-4-(2-(tert-butyl)phenyl)-1,2,4-triazolidine-3,5-dione (3ha)**

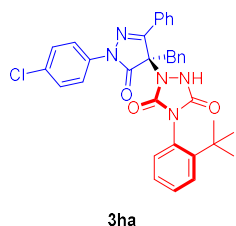

White solid, mp 152-154 °C, 77% yield, > 99% ee, 13:1.  $[\alpha]_D^{25} = +15.76$  (c = 0.6, CH<sub>2</sub>Cl<sub>2</sub>). <sup>1</sup>H NMR (400 MHz, CDCl<sub>3</sub>) δ 9.14 (s, 1H), 7.58 (d, *J* = 8.2 Hz, 2H), 7.30 - 7.12 (m, 5H), 7.08 - 6.92 (m, 4H), 6.86 - 6.82 (m, 2H), 6.79 - 6.75 (m, 2H), 6.72 - 6.67 (m, 1H), 6.63 - 6.53 (m, 2H), 3.62 - 3.47 (m, 1H), 3.42 (d, *J* = 12.6 Hz, 1H), 0.83 (s, 9H). <sup>13</sup>C NMR (101 MHz, CDCl<sub>3</sub>) δ 170.0, 156.1, 153.3, 152.6, 148.9, 136.6, 132.5, 131.4, 130.5, 130.0, 128.8, 128.6, 128.6, 128.4, 128.3, 128.3, 128.1, 127.7, 126.4, 125.5, 120.4, 71.7, 39.6, 35.4, 31.3, 31.3. HRMS (ESI) *m/z*: [M + Na]<sup>+</sup> Calcd for C<sub>34</sub>H<sub>30</sub>ClN<sub>5</sub>NaO<sub>3</sub>, 614.1935; Found 614.1930. The enantiomeric ratio was determined by HPLC analysis on a chiral AD-H column. *n*-Hexane/*i*-PrOH = 8:2, flow rate = 0.8 mL/min., λ = 254 nm, *t<sub>R</sub>* = 6.1 min. (major).

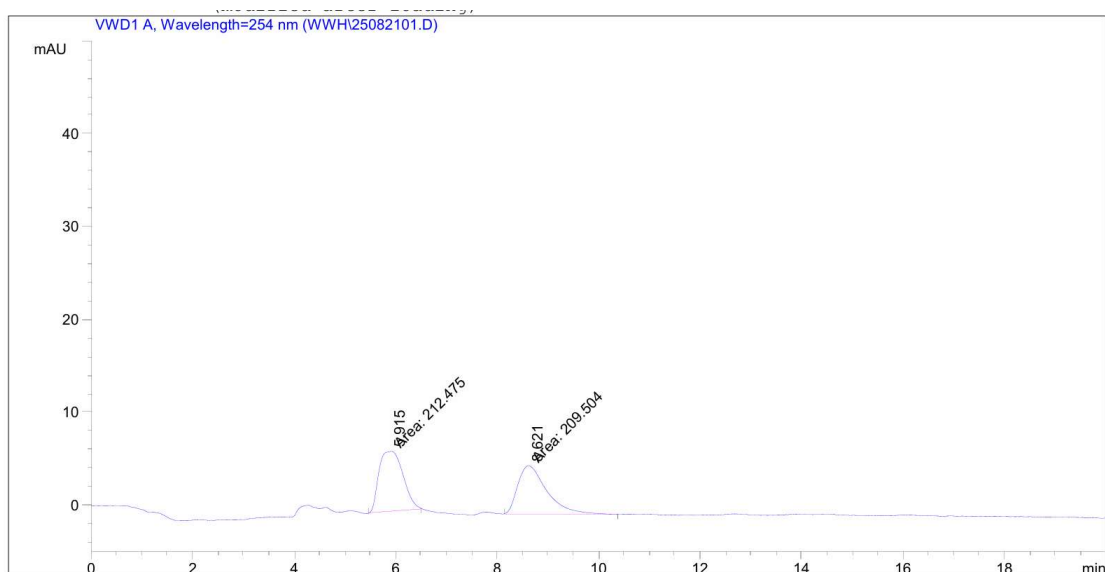

| Peak # | RetTime [min] | Type | Width [min] | Area mAU  | Area *s | Height [mAU] | Area %  |
|--------|---------------|------|-------------|-----------|---------|--------------|---------|
| 1      | 5.915         | MM   | 0.5483      | 212.47543 |         | 6.45885      | 50.3521 |
| 2      | 8.621         | MM   | 0.6680      | 209.50403 |         | 5.22715      | 49.6479 |

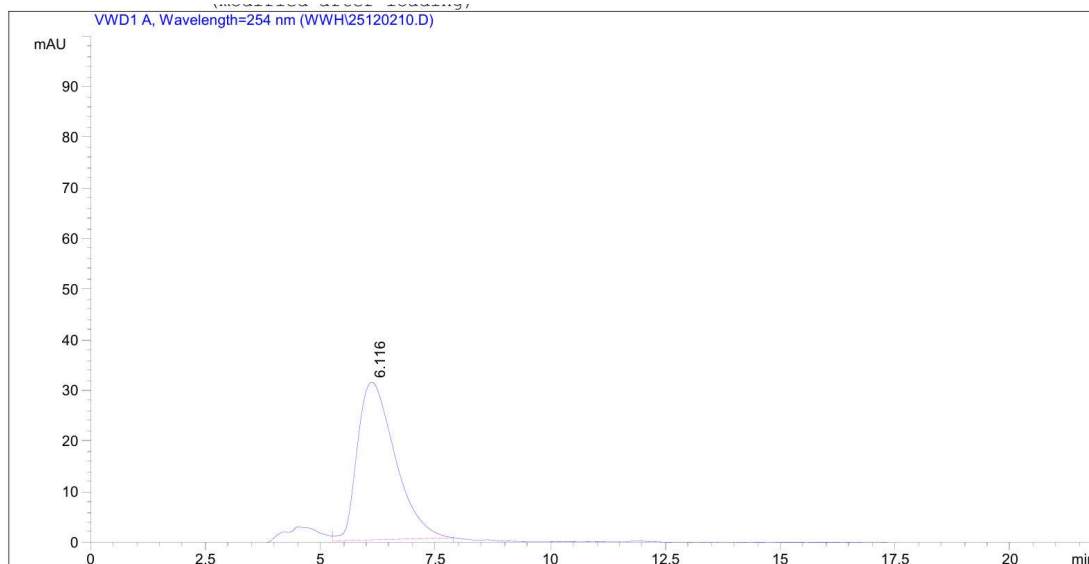

| Peak # | RetTime [min] | Type | Width [min] | Area mAU   | Area *s | Height [mAU] | Area %   |
|--------|---------------|------|-------------|------------|---------|--------------|----------|
| 1      | 6.116         | VB   | 0.8626      | 1784.41882 |         | 31.18735     | 100.0000 |

**1-(4-benzyl-1-(4-bromophenyl)-5-oxo-3-phenyl-4,5-dihydro-1H-pyrazol-4-yl)-4-(2-(tert-butyl)phenyl)-1,2,4-triazolidine-3,5-dione (3ia)**

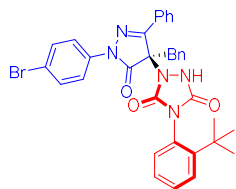

3ia

White solid, mp 153-155 °C, 73% yield, 94% ee, dr = 13:1.  $[\alpha]_D^{25} = +23.810$  (c = 0.4, CH<sub>2</sub>Cl<sub>2</sub>). <sup>1</sup>H NMR (400 MHz, CDCl<sub>3</sub>) δ 8.08 -8.01 (m, 2H), 7.57 -7.32 (m, 10H), 7.25 -6.96 (m, 5H), 6.95 -6.86 (m, 2H), 3.91 - 3.82 (m, 2H), 1.12 (s, 9H). <sup>13</sup>C NMR (101 MHz, CDCl<sub>3</sub>) δ 170.6, 155.9, 153.5, 153.3, 149.2, 135.7, 133.5, 131.5, 131.1, 130.7, 130.4, 130.2, 129.7, 129.3, 129.0, 128.7, 128.6, 128.2, 128.0, 127.6, 126.8, 121.1, 71.1, 39.1, 35.3, 31.2. HRMS (ESI) m/z: [M + Na]<sup>+</sup> Calcd for C<sub>34</sub>H<sub>30</sub>BrN<sub>5</sub>NaO<sub>3</sub>, 658.1430; Found 658.1426. The enantiomeric ratio was determined by HPLC analysis on a chiral AD-H column. *n*-Hexane/*i*-PrOH = 8:2, flow rate = 0.8 mL/min., λ = 232 nm, t<sub>R</sub> = 8.7 min. (minor), 14.1 min. (major).

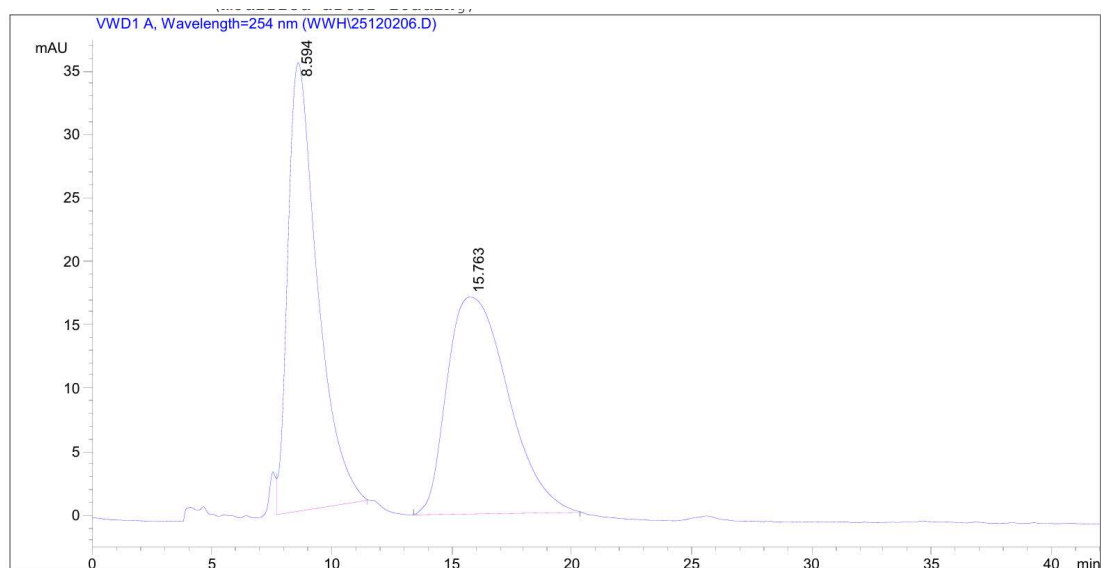

| Peak # | RetTime [min] | Type | Width [min] | Area mAU *s | Height [mAU] | Area %  |
|--------|---------------|------|-------------|-------------|--------------|---------|
| 1      | 8.594         | VB   | 1.2408      | 3044.78833  | 35.34923     | 50.1320 |
| 2      | 15.763        | BB   | 2.0843      | 3028.75928  | 17.12042     | 49.8680 |

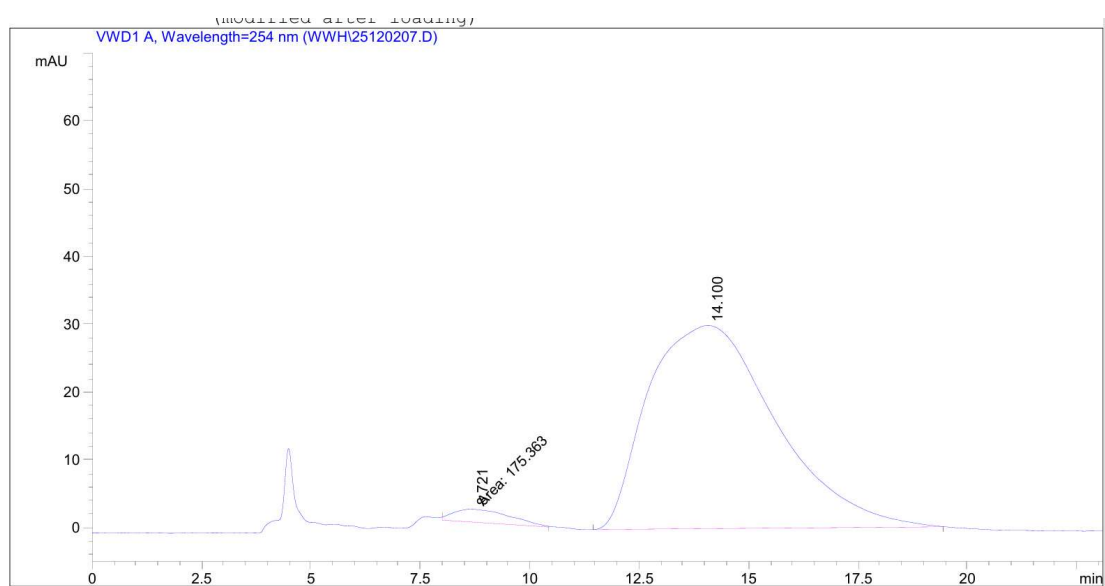

| Peak # | RetTime [min] | Type | Width [min] | Area mAU *s | Height [mAU] | Area %  |
|--------|---------------|------|-------------|-------------|--------------|---------|
| 1      | 8.721         | MM   | 1.5294      | 175.36275   | 1.91101      | 2.8020  |
| 2      | 14.100        | BB   | 2.3852      | 6083.02832  | 29.95485     | 97.1980 |

**1-(4-benzyl-5-oxo-3-phenyl-1-(p-tolyl)-4,5-dihydro-1H-pyrazol-4-yl)-4-(2-(tert-butyl)phenyl)-1,2,4-triazolidine-3,5-dione (3ja)**

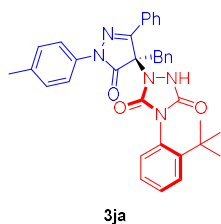

White solid, mp 167-169 °C, 73% yield, 84% ee, dr = 15:1.  $[\alpha]_D^{25} = +16.956$  (c = 0.4, CH<sub>2</sub>Cl<sub>2</sub>). <sup>1</sup>H NMR (400 MHz, CDCl<sub>3</sub>) δ 9.53 (s, 1H), 8.11 -8.02 (m, 2H), 7.52 - 7.44 (m, 4H), 7.38 - 7.32 (m, 3H), 7.24 -7.13 (m, 2H), 7.11 - 7.01 (m, 5H), 6.94 (dd, *J* = 11.5, 7.6 Hz, 2H), 3.86 (m, 2H), 2.29 (d, *J* = 6.3 Hz, 3H), 1.11 (s, 9H). <sup>13</sup>C NMR (101 MHz, CDCl<sub>3</sub>) δ 170.0, 156.1, 153.5, 153.1, 149.1, 136.1, 134.3, 131.6, 130.9, 130.3, 130.3, 130.1, 129.7, 129.3, 129.2, 128.5, 128.3, 128.2, 127.6, 126.7, 120.7, 71.8, 39.7, 35.3, 31.2, 21.1. HRMS (ESI) *m/z*: [M + Na]<sup>+</sup> Calcd for C<sub>35</sub>H<sub>33</sub>N<sub>5</sub>NaO<sub>3</sub>, 594.2481; Found 594.2468. The enantiomeric ratio was determined by HPLC analysis on a chiral AD-H column. *n*-Hexane/*i*-PrOH = 3:2, flow rate = 0.8 mL/min., λ = 254 nm, *t*<sub>R</sub> = 22.1 min. (minor), 20.0 min. (major).

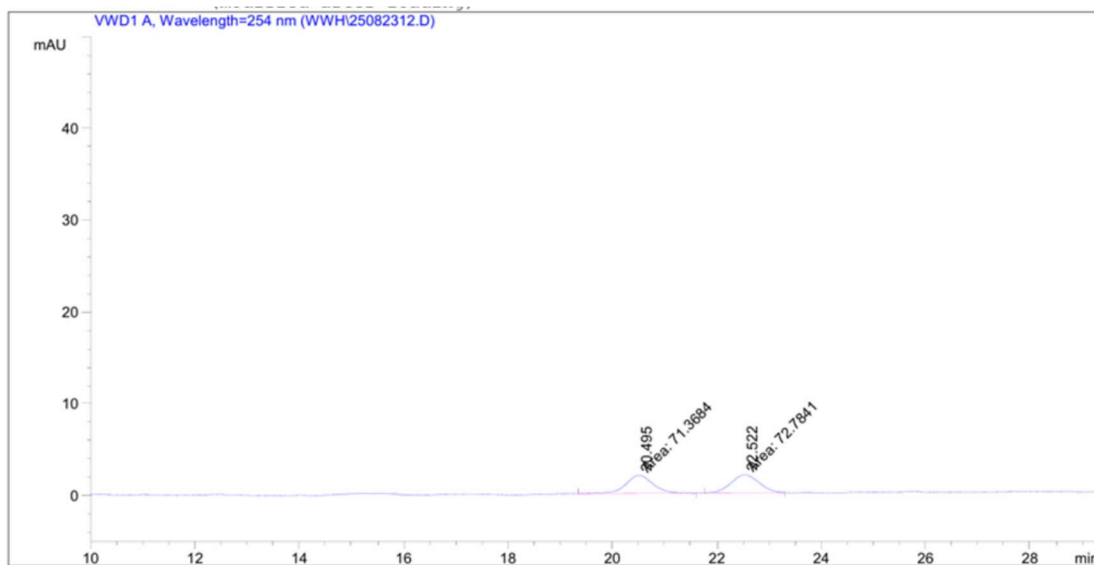

| Peak # | RetTime [min] | Type | Width [min] | Area mAU * s | Height [mAU] | Area %  |
|--------|---------------|------|-------------|--------------|--------------|---------|
| 1      | 20.495        | MM   | 0.6057      | 71.36836     | 1.96367      | 49.5089 |
| 2      | 22.522        | MM   | 0.6201      | 72.78415     | 1.95637      | 50.4911 |

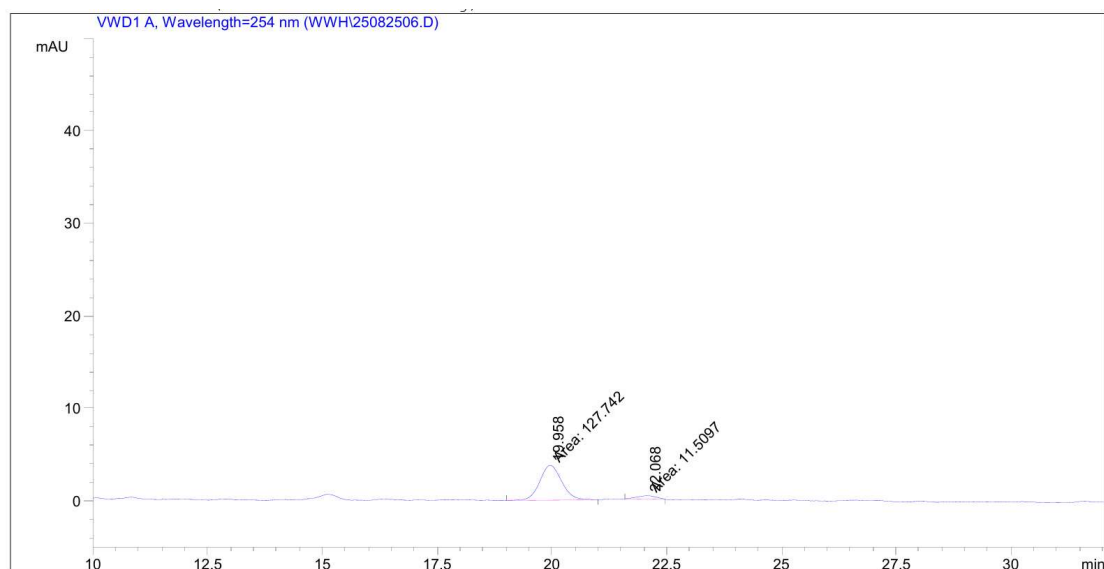

| Peak # | RetTime [min] | Type | Width [min] | Area mAU *s | Height [mAU] | Area %  |
|--------|---------------|------|-------------|-------------|--------------|---------|
| 1      | 19.958        | MM   | 0.5619      | 127.74215   | 3.78914      | 91.7346 |
| 2      | 22.068        | MM   | 0.5102      | 11.50971    | 3.75967e-1   | 8.2654  |

**1-(4-benzyl-3-(2-fluorophenyl)-5-oxo-1-phenyl-4,5-dihydro-1H-pyrazol-4-yl)-4-(2-(tert-butyl)phenyl)-1,2,4-triazolidine-3,5-dione (3ka)**

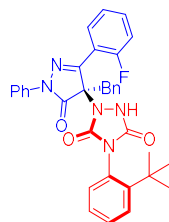

White solid, mp 266-268 °C, 71% yield, > 99% ee, dr = 12:1.  $[\alpha]_D^{25} = +5.556$  (c = 0.05, CH<sub>2</sub>Cl<sub>2</sub>). <sup>1</sup>H NMR (400 MHz, CDCl<sub>3</sub>) δ 9.20 (s, 1H), 8.12 - 8.08 (m, 1H), 7.57 - 7.54 (m, 4H), 7.43 - 7.27 (m, 6H), 7.25 - 7.15 (m, 4H), 7.09 (d, *J* = 7.4 Hz, 3H), 4.01 (d, *J* = 12.5 Hz, 1H), 3.88 (d, *J* = 12.5 Hz, 1H), 1.25 (s, 9H). <sup>13</sup>C NMR (101 MHz, CDCl<sub>3</sub>) δ 170.0, 161.4, 154.1 (d, *J* = 291.1 Hz), 151.0, 149.8, 149.0, 136.7, 132.6, 131.5, 130.4 (d, *J* = 7.5 Hz), 130.1, 129.8 (d, *J* = 7.0 Hz), 128.7, 128.6, 128.3, 128.2, 127.7, 127.5, 126.2, 125.0 (d, *J* = 3.1 Hz), 120.2, 118.0 (d, *J* = 21.2 Hz), 117.0 (d, *J* = 23.0 Hz), 71.9, 38.9, 35.5, 31.3. <sup>19</sup>F NMR (377 MHz, CDCl<sub>3</sub>) δ -107.47. HRMS (ESI) *m/z*: [M + Na]<sup>+</sup> Calcd for C<sub>34</sub>H<sub>30</sub>FN<sub>5</sub>NaO<sub>3</sub>, 598.2230; Found 598.2219. The enantiomeric ratio was determined by HPLC analysis on a chiral AD-H column. *n*-Hexane/*i*-PrOH = 15:2, flow rate = 0.8 mL/min., λ = 232 nm, t<sub>R</sub> = 13.3 min. (major).

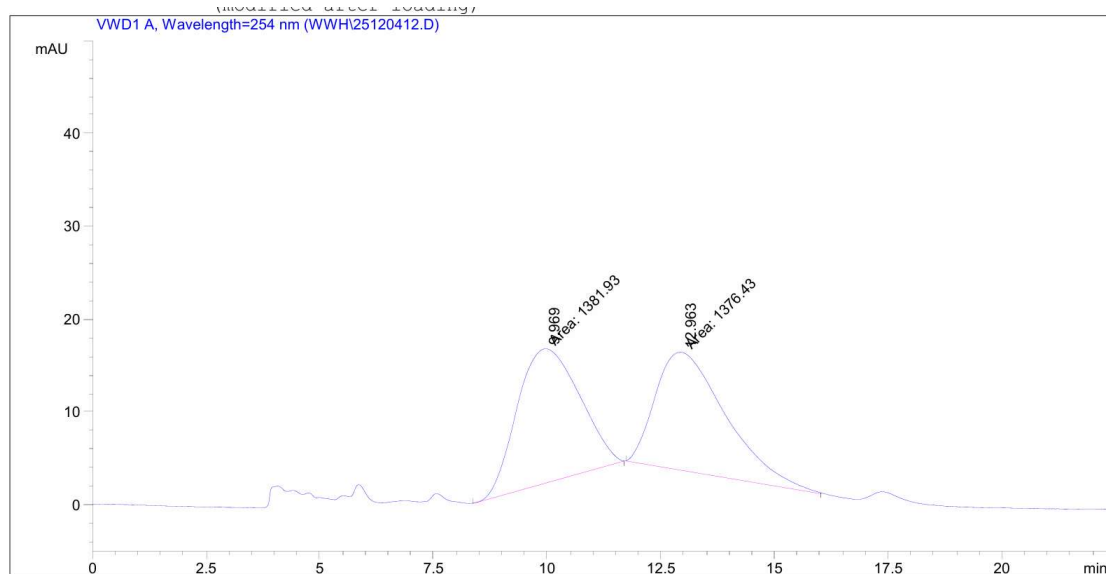

| Peak # | RetTime [min] | Type | Width [min] | Area mAU *s | Height [mAU] | Area %  |
|--------|---------------|------|-------------|-------------|--------------|---------|
| 1      | 9.969         | MM   | 1.5900      | 1381.92615  | 14.48521     | 50.0996 |
| 2      | 12.963        | MM   | 1.8028      | 1376.43359  | 12.72490     | 49.9004 |

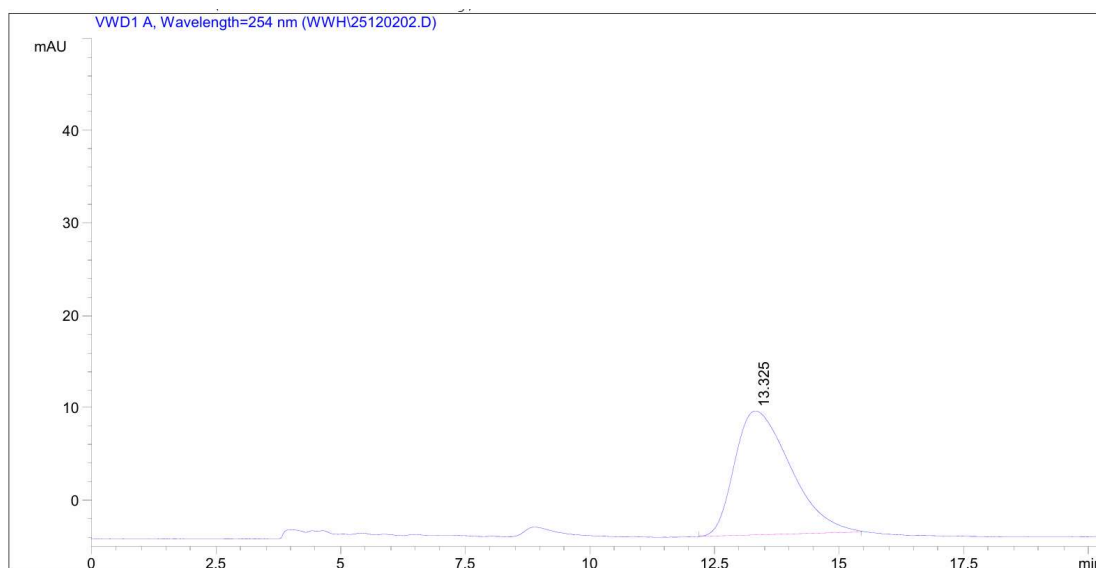

| Peak # | RetTime [min] | Type | Width [min] | Area mAU *s | Height [mAU] | Area %   |
|--------|---------------|------|-------------|-------------|--------------|----------|
| 1      | 13.325        | BB   | 1.1177      | 1046.78723  | 13.42755     | 100.0000 |

**1-(4-benzyl-5-oxo-1-phenyl-3-(*o*-tolyl)-4,5-dihydro-1*H*-pyrazol-4-yl)-4-(2-(*tert*-butyl)phenyl)-1,2,4-triazolidine-3,5-dione (3la)**

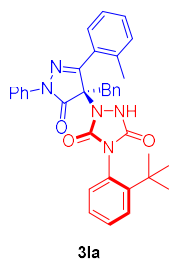

White solid, mp 127-129 °C, 68% yield, 96% ee, dr = 15:1.  $[\alpha]_D^{25} = +2.333$  ( $c = 0.3$ ,  $\text{CH}_2\text{Cl}_2$ ).  $^1\text{H NMR}$  (400 MHz,  $\text{CDCl}_3$ )  $\delta$  8.11 -8.02 (m, 2H), 7.52 - 7.44 (m, 4H), 7.38 - 7.32 (m, 3H), 7.26 -6.99 (m, 8H), 6.94 (dd,  $J = 11.5, 7.6$  Hz, 2H), 3.92 - 3.82 (m, 2H), 2.29 (s, 3H), 1.11 (d,  $J = 4.5$  Hz, 9H).  $^{13}\text{C NMR}$  (101 MHz,  $\text{CDCl}_3$ )  $\delta$  170.6, 156.1, 154.2, 149.0, 131.5, 131.0, 130.3, 130.1, 129.8, 129.8, 129.6, 129.2, 128.5, 128.4, 128.2, 127.6, 127.2, 126.7, 124.3, 116.7, 100.0, 70.9, 39.3, 35.3, 31.1, 29.6. HRMS (ESI)  $m/z$ :  $[\text{M} + \text{Na}]^+$  Calcd for  $\text{C}_{35}\text{H}_{33}\text{N}_5\text{NaO}_3$ , 594.2481; Found 594.2473. The enantiomeric ratio was determined by HPLC analysis on a chiral AD-H column.  $n$ -Hexane/ $i$ -PrOH = 8:2, flow rate = 0.8 mL/min.,  $\lambda = 232$  nm,  $t_R = 8.8$  min (minor), 13.6 min. (major).

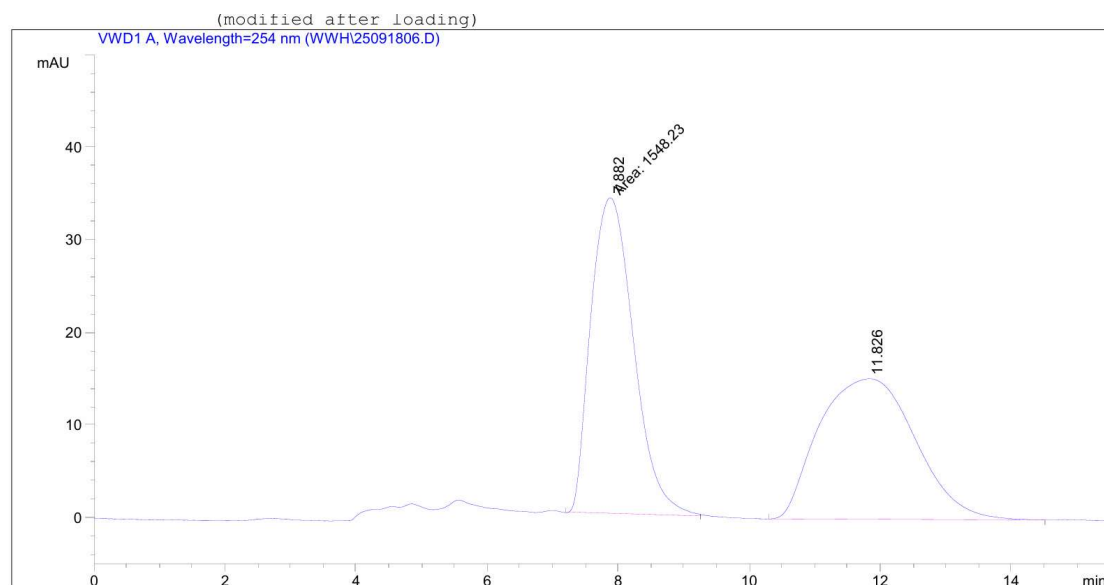

| Peak # | RetTime [min] | Type | Width [min] | Area mAU *s | Height [mAU] | Area %  |
|--------|---------------|------|-------------|-------------|--------------|---------|
| 1      | 7.882         | MM   | 0.7574      | 1548.23181  | 34.07030     | 49.9535 |
| 2      | 11.826        | BP   | 1.2016      | 1551.11499  | 15.17085     | 50.0465 |

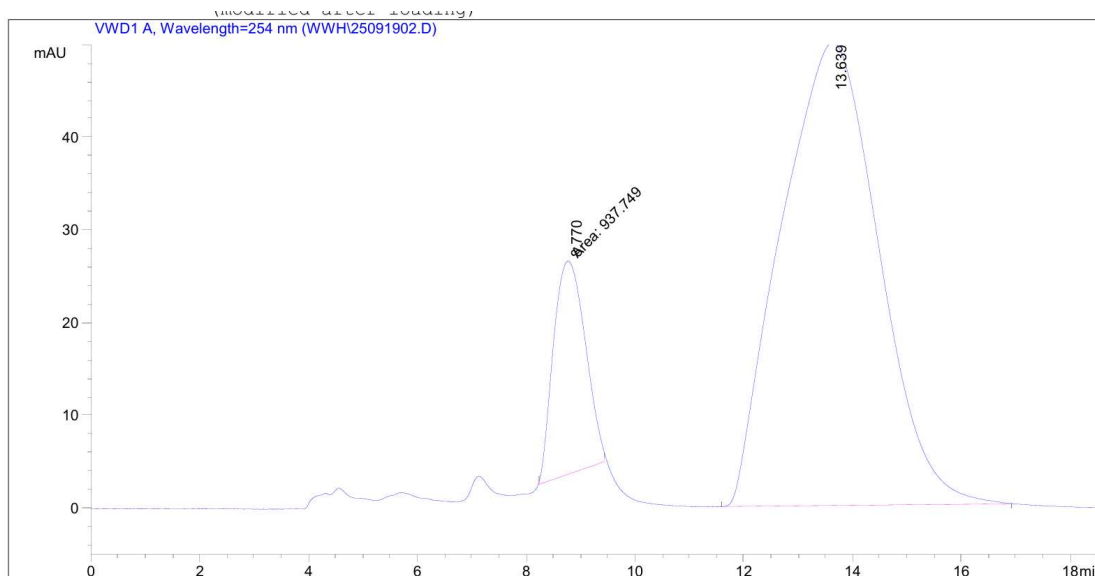

| Peak # | RetTime [min] | Type | Width [min] | Area mAU *s | Height [mAU] | Area %  |
|--------|---------------|------|-------------|-------------|--------------|---------|
| 1      | 8.770         | MM   | 0.6785      | 937.74854   | 23.03412     | 13.1348 |
| 2      | 13.639        | BB   | 1.6442      | 6201.66016  | 49.98106     | 86.8652 |

**1-(4-benzyl-5-oxo-1-phenyl-3-(m-tolyl)-4,5-dihydro-1H-pyrazol-4-yl)-4-(2-(tert-butyl)phenyl)-1,2,4-triazolidine-3,5-dion (3ma)**

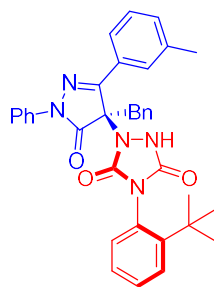

**3ma**

White solid, mp 130-132 °C, 78% yield, 84% ee, dr = 11:1.  $[\alpha]_D^{25} = +6.215$  (c = 0.3, CH<sub>2</sub>Cl<sub>2</sub>). <sup>1</sup>H NMR (400 MHz, CDCl<sub>3</sub>) δ 8.14 (d, *J* = 7.3 Hz, 2H), 7.67 -7.53 (m, 6H), 7.47 -7.28 (m, 6H), 7.12 (dd, *J* = 16.9, 7.9 Hz, 3H), 6.96 (d, *J* = 8.3 Hz, 2H), 3.97 (d, *J* = 12.8 Hz, 1H), 3.91 (d, *J* = 11.9 Hz, 1H), 2.83 (s, 3H), 1.20 (s, 9H). <sup>13</sup>C NMR (101 MHz, CDCl<sub>3</sub>) δ 171.0, 155.7, 154.3, 153.9, 149.2, 135.7, 133.6, 131.3, 131.1, 130.7, 130.4, 130.3, 129.8, 129.3, 129.0, 128.7, 128.2, 128.1, 128.0, 127.5, 126.6, 121.2, 72.1, 39.0, 35.8, 31.7, 31.2. HRMS (ESI) *m/z*: [M + Na]<sup>+</sup> Calcd for C<sub>35</sub>H<sub>33</sub>N<sub>5</sub>NaO<sub>3</sub>, 594.2481; Found 594.2473. The enantiomeric ratio

was determined by HPLC analysis on a chiral AD-H column. *n*-Hexane/*i*-PrOH = 8:2, flow rate = 0.8 mL/min., λ = 232 nm, *t*<sub>R</sub> = 8.3 min (major).

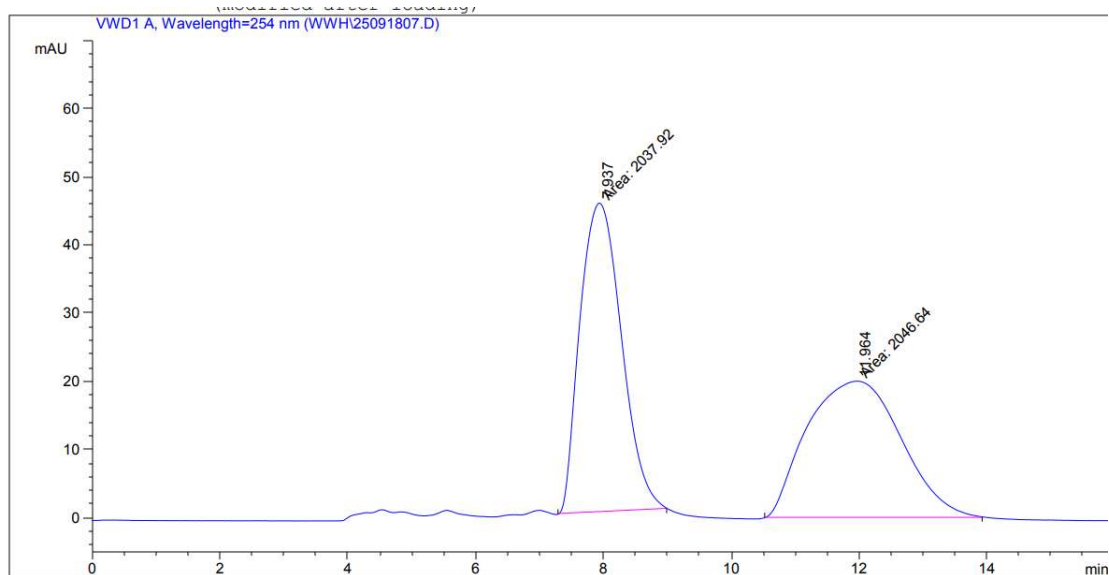

| Peak # | RetTime [min] | Type | Width [min] | Area mAU *s | Height [mAU] | Area %  |
|--------|---------------|------|-------------|-------------|--------------|---------|
| 1      | 7.937         | MM   | 0.7514      | 2037.92310  | 45.20157     | 49.8932 |
| 2      | 11.964        | MM   | 1.7077      | 2046.64392  | 19.97480     | 50.1068 |

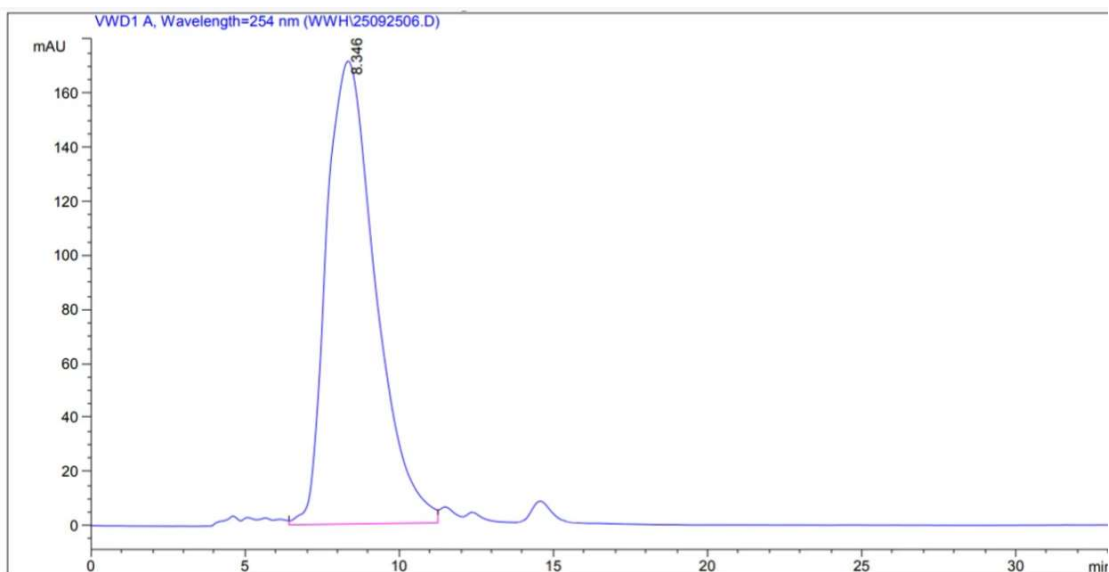

| Peak # | RetTime [min] | Type | Width [min] | Area mAU *s | Height [mAU] | Area %   |
|--------|---------------|------|-------------|-------------|--------------|----------|
| 1      | 8.346         | VV   | 1.5727      | 1.89919e4   | 171.34476    | 100.0000 |

**1-(4-benzyl-3-(4-methoxyphenyl)-5-oxo-1-phenyl-4,5-dihydro-1H-pyrazol-4-yl)-4-(2-(tert-butyl)phenyl)-1,2,4-triazolidine-3,5-dione (3na)**

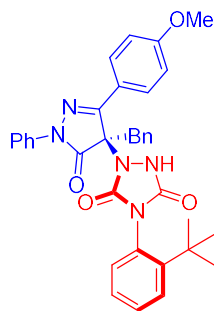

**3na**

White solid, mp 145-147 °C, 86% yield, 90% ee, dr = 15:1.  $[\alpha]_D^{25} = +1.431$  ( $c = 0.4$ ,  $\text{CH}_2\text{Cl}_2$ ).  $^1\text{H NMR}$  (400 MHz,  $\text{CDCl}_3$ )  $\delta$  8.30 (s, 1H), 8.11 -8.03 (m, 2H), 7.57 -7.45 (m, 4H), 7.39 - 7.35 (m, 1H), 7.25 -7.17 (m, 2H), 7.17 -7.12 (m, 2H), 7.12 -7.05 (m, 3H), 7.05 -6.99 (m, 1H), 6.96 (ddd,  $J = 8.6, 7.2, 1.6$  Hz, 2H), 6.73 - 6.70 (m, 1H), 3.97 (d,  $J = 12.5$  Hz, 1H), 3.93 -3.83 (m, 1H), 3.77 (s, 3H), 1.17 (s, 9H).  $^{13}\text{C NMR}$  (101 MHz,  $\text{CDCl}_3$ )  $\delta$  169.9, 156.0, 153.9, 153.0, 149.0, 135.9, 131.7, 131.5, 131.2, 130.4, 130.0, 129.4, 129.3, 128.5, 128.4, 128.3, 127.6, 126.8, 121.5, 119.1, 71.8, 39.7, 35.3, 31.2, 29.7. HRMS (ESI)  $m/z$ :  $[\text{M} + \text{Na}]^+$  Calcd for  $\text{C}_{35}\text{H}_{33}\text{N}_5\text{NaO}_4$ , 610.2430; Found 610.2421. The enantiomeric ratio was determined by HPLC analysis on a chiral AD-H column.  $n$ -Hexane/ $i$ -PrOH = 8:2, flow rate = 0.8 mL/min.,  $\lambda = 232$  nm,  $t_R = 11.4$  min. (major).

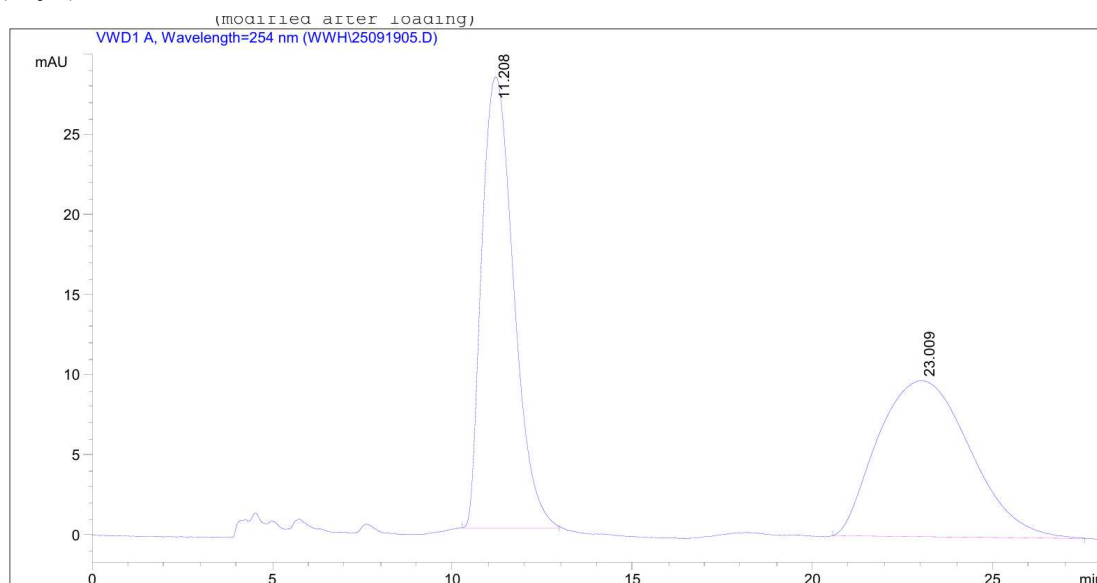

| Peak # | RetTime [min] | Type | Width [min] | Area mAU *s | Height [mAU] | Area %  |
|--------|---------------|------|-------------|-------------|--------------|---------|
| 1      | 11.208        | BB   | 0.9807      | 1734.54077  | 28.16127     | 49.8882 |
| 2      | 23.009        | BB   | 2.0953      | 1742.31787  | 9.74866      | 50.1118 |

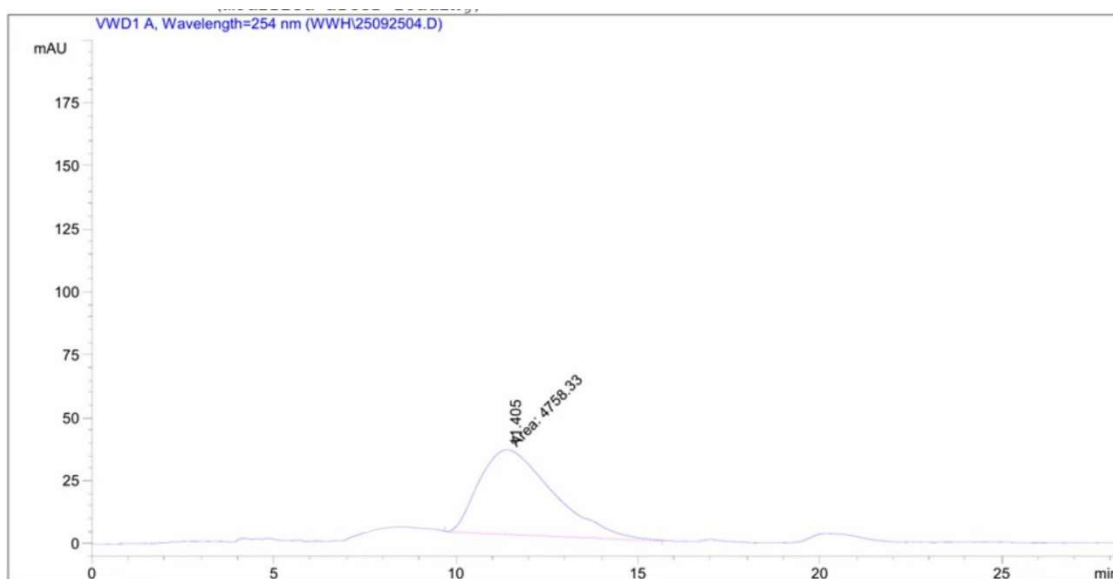

| Peak # | RetTime [min] | Type | Width [min] | Area mAU * s | Height [mAU] | Area %   |
|--------|---------------|------|-------------|--------------|--------------|----------|
| 1      | 11.405        | MM   | 2.3601      | 4758.32764   | 33.60316     | 100.0000 |

**1-(4-benzyl-3-(4-fluorophenyl)-5-oxo-1-phenyl-4,5-dihydro-1H-pyrazol-4-yl)-4-(2-(tert-butyl)phenyl)-1,2,4-triazolidine-3,5-dione (3oa)**

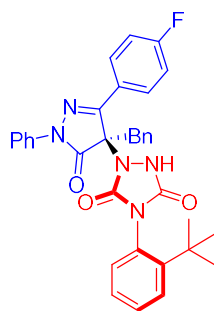

**3oa**

White solid, mp 147-149 °C, 68% yield, 96% ee, dr = 12:1.  $[\alpha]_D^{25} = +5.993$  (c = 0.3, CH<sub>2</sub>Cl<sub>2</sub>). <sup>1</sup>H NMR (400 MHz, CDCl<sub>3</sub>) δ 9.17 (s, 1H), 7.84 (d, *J* = 3.7 Hz, 1H), 7.55 - 7.42 (m, 4H), 7.37 - 7.33 (m, 1H), 7.29 - 7.17 (m, 4H), 7.17 - 7.08 (m, 5H), 7.05 - 6.99 (m, 3H), 3.84 (d, *J* = 12.4 Hz, 1H), 3.76 (d, *J* = 12.3 Hz, 1H), 1.14 (s, 9H). <sup>13</sup>C NMR (101 MHz, CDCl<sub>3</sub>) δ 169.2, 158.9, 154.7 (d, *J* = 271.7 Hz), 150.2, 150.1, 149.1, 136.6, 133.5, 131.5, 130.4 (d, *J* = 3.5 Hz), 130.0 (d, *J* = 7.2 Hz), 129.7, 129.0, 128.7, 128.6, 128.4, 128.3, 128.1, 127.6, 126.3, 120.6, 116.6 (d, *J* = 22.0 Hz), 107.1, 72.0, 39.7, 35.3, 31.1. <sup>19</sup>F NMR (377 MHz, DMSO) δ -109.22.

HRMS (ESI) *m/z*: [M + Na]<sup>+</sup> Calcd for C<sub>34</sub>H<sub>30</sub>FN<sub>5</sub>NaO<sub>3</sub>, 598.2230; Found 598.2225. The enantiomeric ratio was determined by HPLC analysis on a chiral AD-H column. *n*-Hexane/*i*-PrOH = 8:2, flow rate = 0.8 mL/min., λ = 254 nm, *t*<sub>R</sub> = 8.7 min. (minor), 11.8 min. (major).

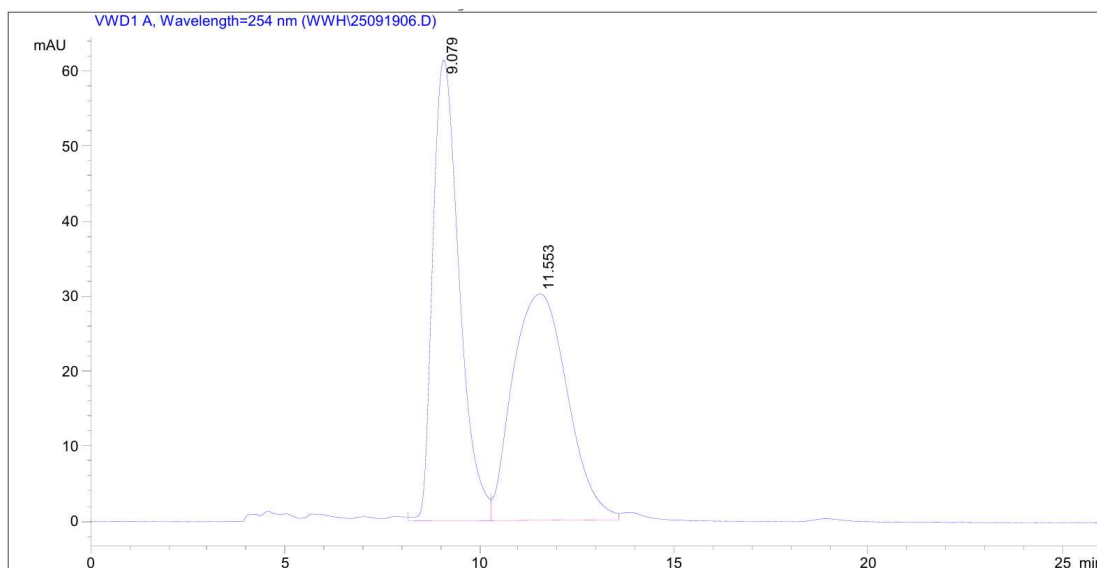

| Peak # | RetTime [min] | Type | Width [min] | Area mAU *s | Height [mAU] | Area %  |
|--------|---------------|------|-------------|-------------|--------------|---------|
| 1      | 9.079         | VV   | 0.7411      | 2913.03979  | 61.42910     | 49.5574 |
| 2      | 11.553        | VV   | 1.1860      | 2965.07764  | 30.20660     | 50.4426 |

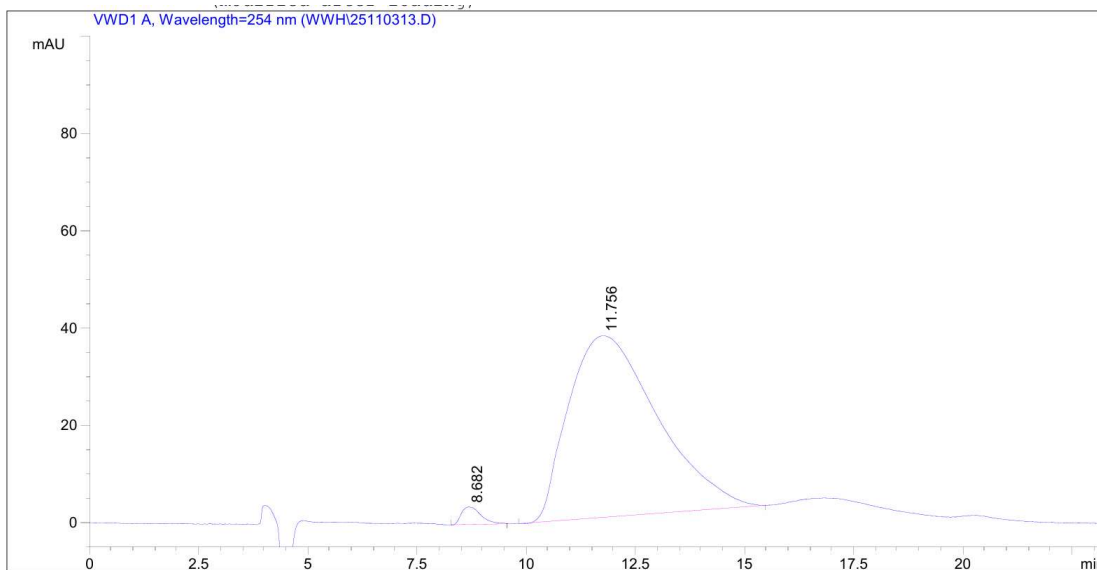

| Peak # | RetTime [min] | Type | Width [min] | Area mAU *s | Height [mAU] | Area %  |
|--------|---------------|------|-------------|-------------|--------------|---------|
| 1      | 8.682         | PB   | 0.4029      | 114.63318   | 3.62004      | 2.1163  |
| 2      | 11.756        | PP   | 1.7024      | 5301.91895  | 37.35766     | 97.8837 |

**1-(4-benzyl-5-oxo-1-phenyl-3-(p-tolyl)-4,5-dihydro-1H-pyrazol-4-yl)-4-(2-(tert-butyl)phenyl)-1,2,4-triazolidine-3,5-dione (3pa)**

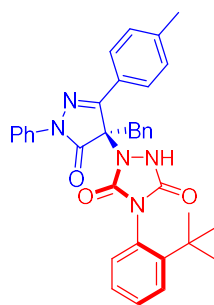

**3pa**

= 6.9 min. (major).

White solid, mp 140-142 °C, 68% yield, > 99% ee, dr = 13:1.  $[\alpha]_D^{25} = +6.977$  (c = 0.3, CH<sub>2</sub>Cl<sub>2</sub>). <sup>1</sup>H NMR (400 MHz, CDCl<sub>3</sub>) δ 7.96 (dd, *J* = 8.4, 3.2 Hz, 2H), 7.50 (ddd, *J* = 10.1, 7.5, 1.5 Hz, 3H), 7.40 -6.90 (m, 14H), 3.96 -3.79 (m, 2H), 2.45 (s, 3H), 1.15 (s, 9H). <sup>13</sup>C NMR (101 MHz, CDCl<sub>3</sub>) δ 141.5, 131.5, 130.3, 130.1, 130.0, 128.7, 128.5, 128.2, 128.1, 127.5, 126.9, 126.7, 126.1, 120.3, 72.2, 39.7, 35.3, 31.3, 21.6. HRMS (ESI) *m/z*: [M + Na]<sup>+</sup> Calcd for C<sub>35</sub>H<sub>33</sub>N<sub>5</sub>NaO<sub>3</sub>, 594.2481; Found 594.2473. The enantiomeric ratio was determined by HPLC analysis on a chiral AD-H column. *n*-Hexane/*i*-PrOH = 8:2, flow rate = 0.8 mL/min., λ = 254 nm, *t*<sub>R</sub>

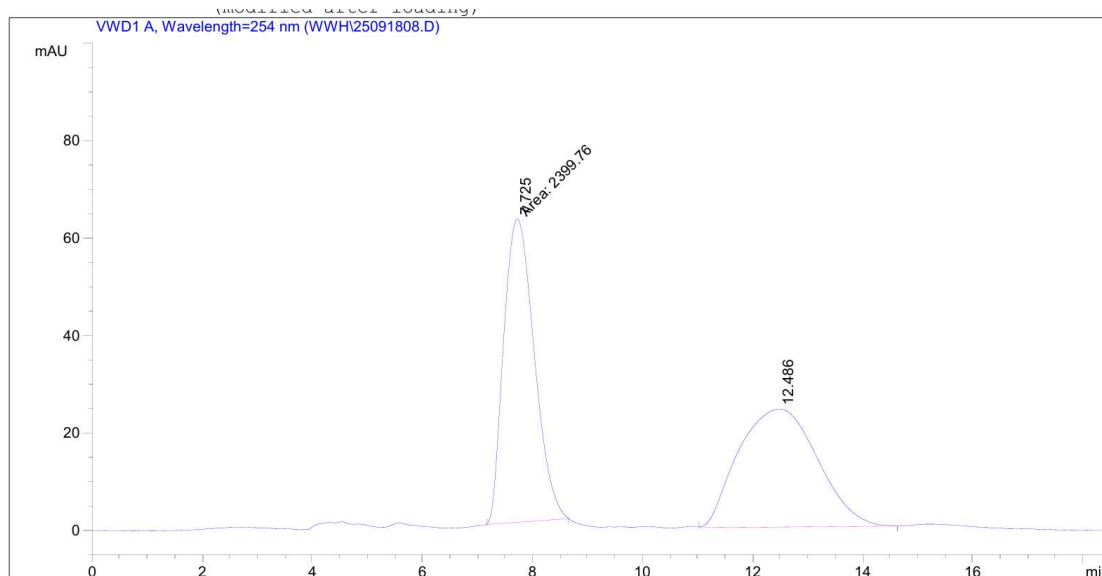

| Peak # | RetTime [min] | Type | Width [min] | Area mAU*s | Height [mAU] | Area %  |
|--------|---------------|------|-------------|------------|--------------|---------|
| 1      | 7.725         | MM   | 0.6428      | 2399.76025 | 62.21721     | 49.8556 |
| 2      | 12.486        | BP   | 1.2066      | 2413.66455 | 24.21463     | 50.1444 |

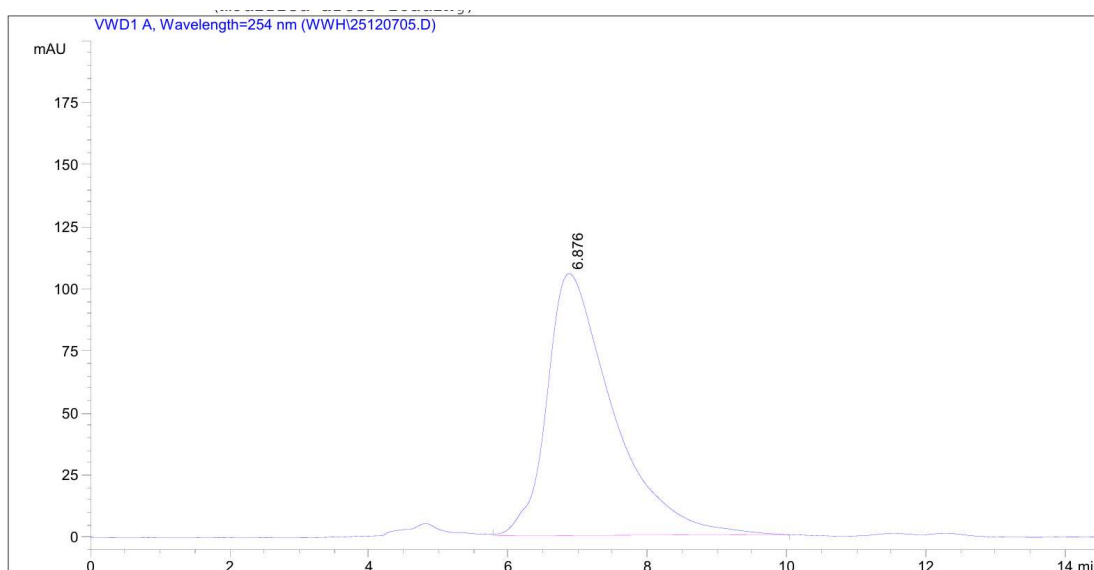

| Peak # | RetTime [min] | Type | Width [min] | Area mAU *s | Height [mAU] | Area %   |
|--------|---------------|------|-------------|-------------|--------------|----------|
| 1      | 6.876         | BB   | 0.9485      | 6967.37207  | 105.44959    | 100.0000 |

**1-(4-benzyl-5-oxo-1-phenyl-3-(thiophen-2-yl)-4,5-dihydro-1H-pyrazol-4-yl)-4-(2-(tert-butyl)phenyl)-1,2,4-triazolidine-3,5-dione (3qa)**

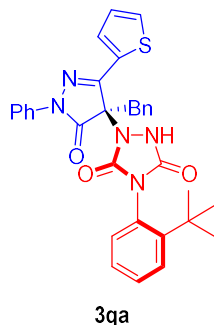

White solid, mp 134-136 °C, 76% yield, > 99% ee, dr = 10:1.  $[\alpha]_D^{25} = +5.242$  (c = 0.2, CH<sub>2</sub>Cl<sub>2</sub>). <sup>1</sup>H NMR (400 MHz, CDCl<sub>3</sub>) δ 9.12 (s, 1H), 7.87 - 7.82 (m, 1H), 7.55 - 7.41 (m, 4H), 7.38 - 7.34 (m, 1H), 7.32 - 7.17 (m, 4H), 7.17 - 7.08 (m, 5H), 7.07 - 6.94 (m, 3H), 3.85 (d, *J* = 12.4 Hz, 1H), 3.77 (d, *J* = 12.4 Hz, 1H), 1.14 (s, 9H). <sup>13</sup>C NMR (101 MHz, CDCl<sub>3</sub>) δ 169.2, 156.0, 153.4, 150.1, 149.1, 136.6, 133.5, 131.5, 130.4, 130.1, 130.0, 129.7, 129.0, 128.7, 128.6, 128.4, 128.3, 128.1, 127.6, 126.3, 120.5, 77.3, 72.0, 39.7, 35.3, 31.1. HRMS (ESI) *m/z*: [M + Na]<sup>+</sup> Calcd for C<sub>32</sub>H<sub>29</sub>N<sub>5</sub>O<sub>3</sub>NaS, 586.1889; Found 586.1884. The enantiomeric ratio

was determined by HPLC analysis on a chiral AD-H column. *n*-Hexane/*i*-PrOH = 15:2, flow rate = 0.8 mL/min., λ = 254 nm, *t*<sub>R</sub> = 26.3 min. (major).

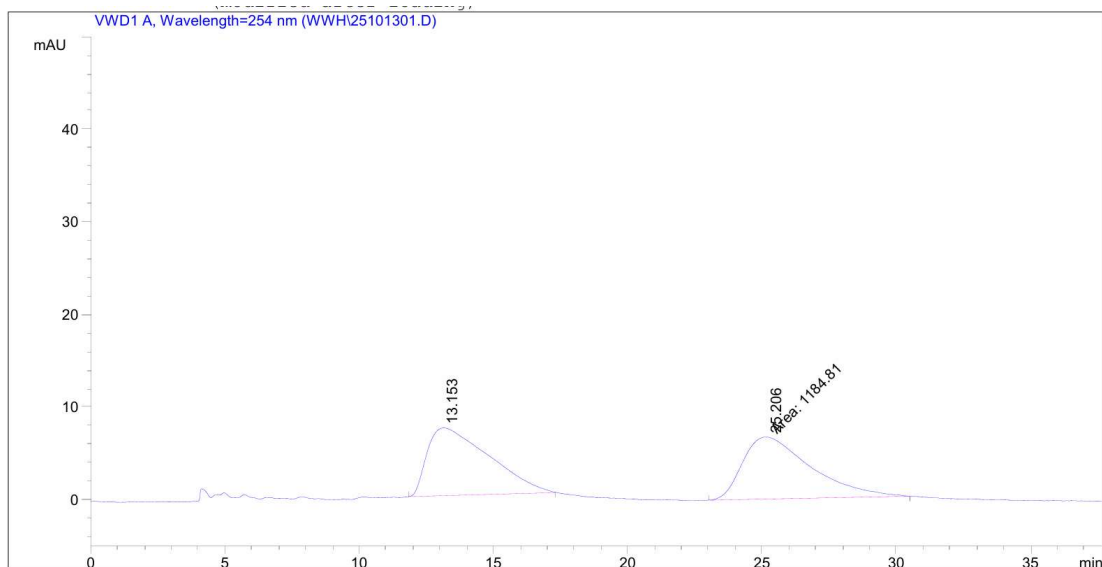

| Peak # | RetTime [min] | Type | Width [min] | Area mAU *s | Height [mAU] | Area %  |
|--------|---------------|------|-------------|-------------|--------------|---------|
| 1      | 13.153        | BB   | 1.8773      | 1173.48059  | 7.34410      | 49.7598 |
| 2      | 25.206        | MM   | 2.9474      | 1184.80994  | 6.69977      | 50.2402 |

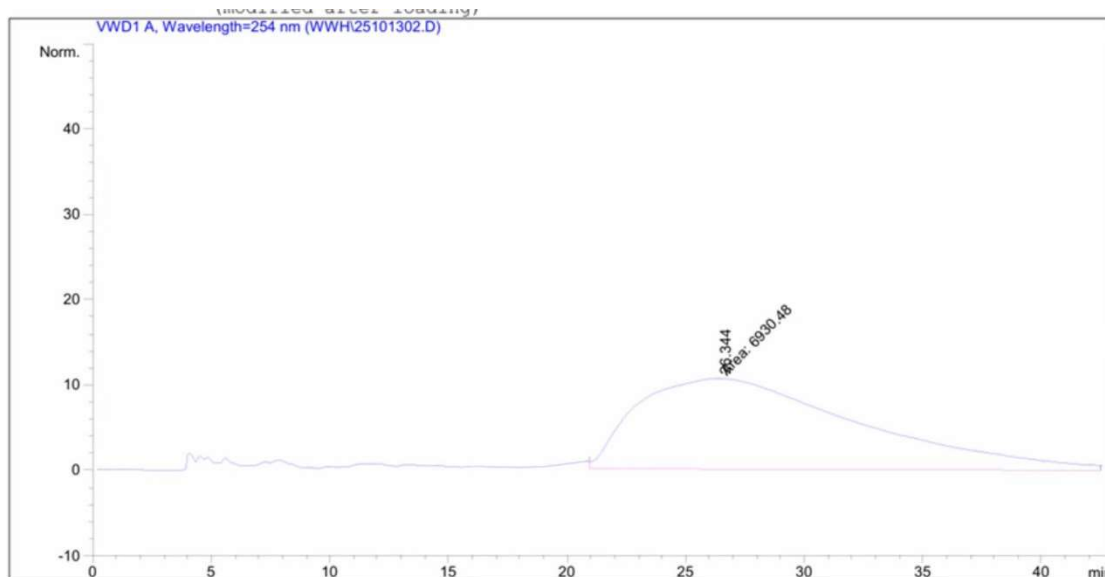

| Peak # | RetTime [min] | Type | Width [min] | Area mAU *s | Height [mAU] | Area %   |
|--------|---------------|------|-------------|-------------|--------------|----------|
| 1      | 26.344        | MM   | 10.8405     | 6930.47852  | 10.65521     | 100.0000 |

**4-(2-(tert-butyl)phenyl)-1-(4-(2-fluorobenzyl)-5-oxo-1,3-diphenyl-4,5-dihydro-1H-pyrazol-4-yl)-1,2,4-triazolidine-3,5-dion (3ra)**

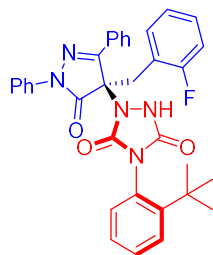

**3ra**

White solid, mp 249-251 °C, 73% yield, 94% ee, dr = 12:1. <sup>1</sup>H NMR (400 MHz, CDCl<sub>3</sub>) δ 9.19 (s, 1H), 8.08 -8.01 (m, 2H), 7.61 -7.40 (m, 6H), 7.38 -7.24 (m, 3H), 7.24 -7.03 (m, 4H), 6.99 (dd, *J* = 7.8, 1.5 Hz, 1H), 6.91 -6.81 (m, 2H), 4.04 (d, *J* = 12.9 Hz, 1H), 4.00 -3.89 (m, 1H), 1.11 (s, 9H). <sup>13</sup>C NMR (101 MHz, CDCl<sub>3</sub>) δ 170.0, 160.1 (d, *J* = 253.7 Hz), 155.5, 152.6, 151.0 (d, *J* = 3.6 Hz), 148.9, 136.7, 132.6 (d, *J* = 8.8 Hz), 131.5, 130.4, 130.3, 130.1, 130.1, 129.8, 129.8, 128.7 (d, *J* = 9.2 Hz), 128.3, 128.2, 127.5, 126.2, 125.0, 125.0, 122.6 (d, *J* = 25.5 Hz), 120.2, 118.1, 117.0 (d, *J* = 23.0 Hz), 71.9, 35.5, 31.3. <sup>19</sup>F NMR (377 MHz, CDCl<sub>3</sub>) δ -113.71. HRMS (ESI) *m/z*: [M + Na]<sup>+</sup> Calcd for C<sub>34</sub>H<sub>30</sub>FN<sub>5</sub>NaO<sub>3</sub>, 598.2230; Found 598.2224. The enantiomeric ratio was determined by HPLC analysis on a chiral AD-H column. *n*-Hexane/*i*-PrOH = 8:2, flow rate = 0.8 mL/min., λ = 254 nm, *t*<sub>R</sub> = 9.1 min. (minor), 14.7 min. (major).

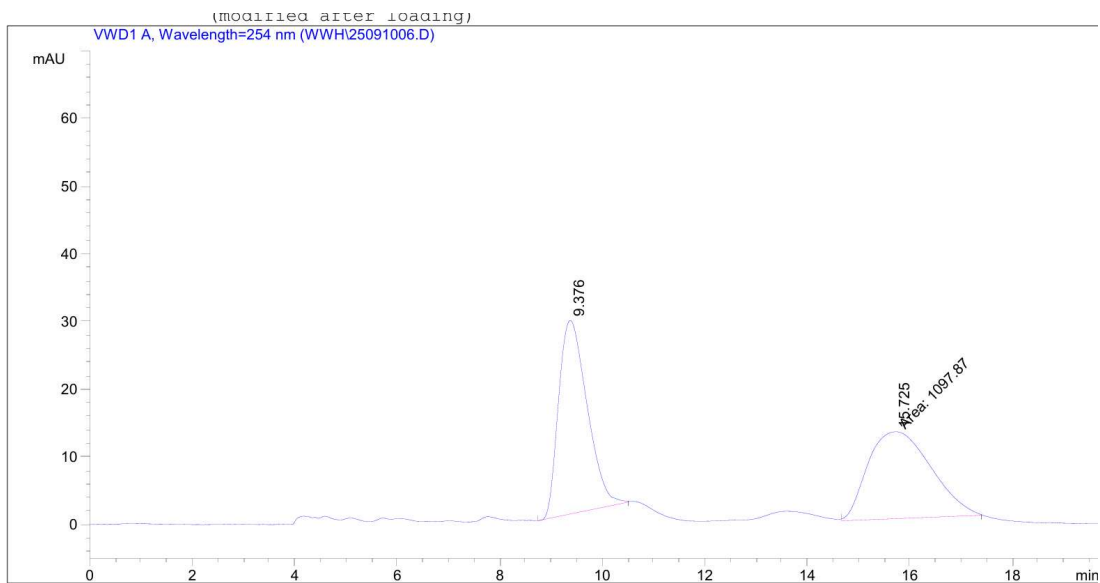

| Peak # | RetTime [min] | Type | Width [min] | Area mAU *s | Height [mAU] | Area %  |
|--------|---------------|------|-------------|-------------|--------------|---------|
| 1      | 9.376         | PB   | 0.5898      | 1106.36414  | 28.58725     | 50.1926 |
| 2      | 15.725        | MM   | 1.4241      | 1097.87158  | 12.84876     | 49.8074 |

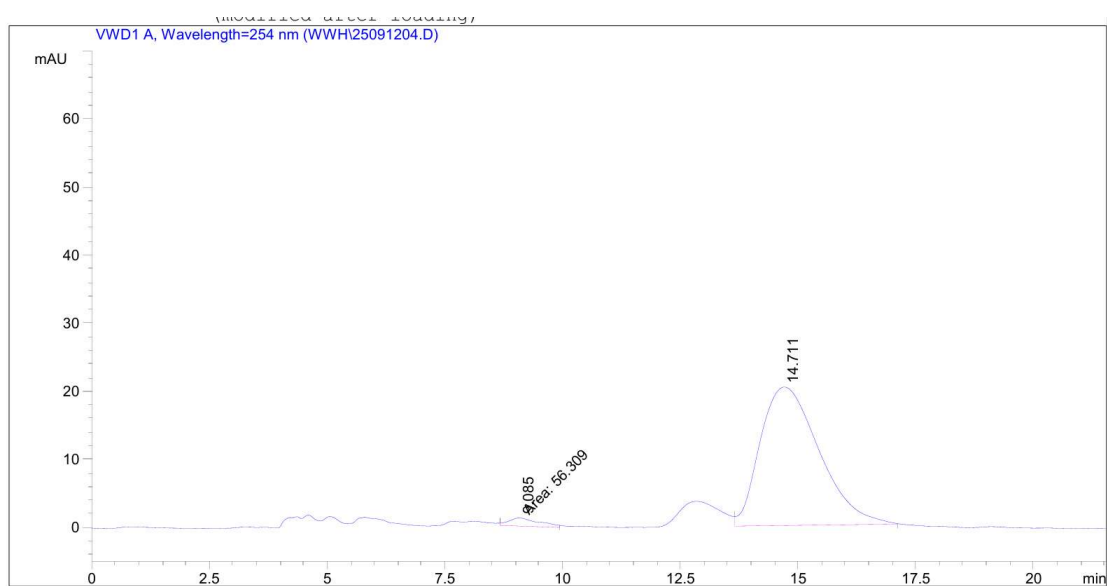

| Peak # | RetTime [min] | Type | Width [min] | Area mAU *s | Height [mAU] | Area %  |
|--------|---------------|------|-------------|-------------|--------------|---------|
| 1      | 9.085         | MM   | 0.7657      | 56.30904    | 1.22557      | 3.0673  |
| 2      | 14.711        | VB   | 1.0641      | 1779.48267  | 20.34599     | 96.9327 |

**4-(2-(tert-butyl)phenyl)-1-(4-(2-methylbenzyl)-5-oxo-1,3-diphenyl-4,5-dihydro-1H-pyrazol-4-yl)-1,2,4-triazolidine-3,5-dione (3sa)**

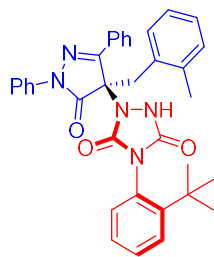

**3sa**

White solid, mp 150-152 °C, 85% yield, > 99% ee, dr = 10:1.  $[\alpha]_D^{25} = +0.8$  (c = 0.8, CH<sub>2</sub>Cl<sub>2</sub>). <sup>1</sup>H NMR (400 MHz, CDCl<sub>3</sub>) δ 8.45 (s, 1H), 7.87 (d, *J* = 7.3 Hz, 2H), 7.55 - 7.45 (m, 3H), 7.44 - 7.26 (m, 5H), 7.25 - 6.90 (m, 8H), 4.01 - 3.85 (m, 2H), 2.43 (s, 3H), 1.15 (s, 9H). <sup>13</sup>C NMR (101 MHz, CDCl<sub>3</sub>) δ 177.7, 169.8, 156.0, 153.3, 149.1, 136.7, 134.2, 131.4, 131.3, 130.4, 129.5, 129.4, 128.8, 128.6, 128.5, 128.3, 127.6, 126.6, 126.4, 120.2, 71.8, 38.9, 35.3, 31.2, 29.6. HRMS (ESI) *m/z*:

[M + Na]<sup>+</sup> Calcd for C<sub>35</sub>H<sub>33</sub>N<sub>5</sub>NaO<sub>3</sub>, 594.2481; Found 594.2473. The enantiomeric ratio was determined by HPLC analysis on a chiral IF-H column. *n*-Hexane/*i*-PrOH = 8:2, flow rate = 0.8 mL/min., λ = 254 nm, t<sub>R</sub> = 6.2 min. (major).

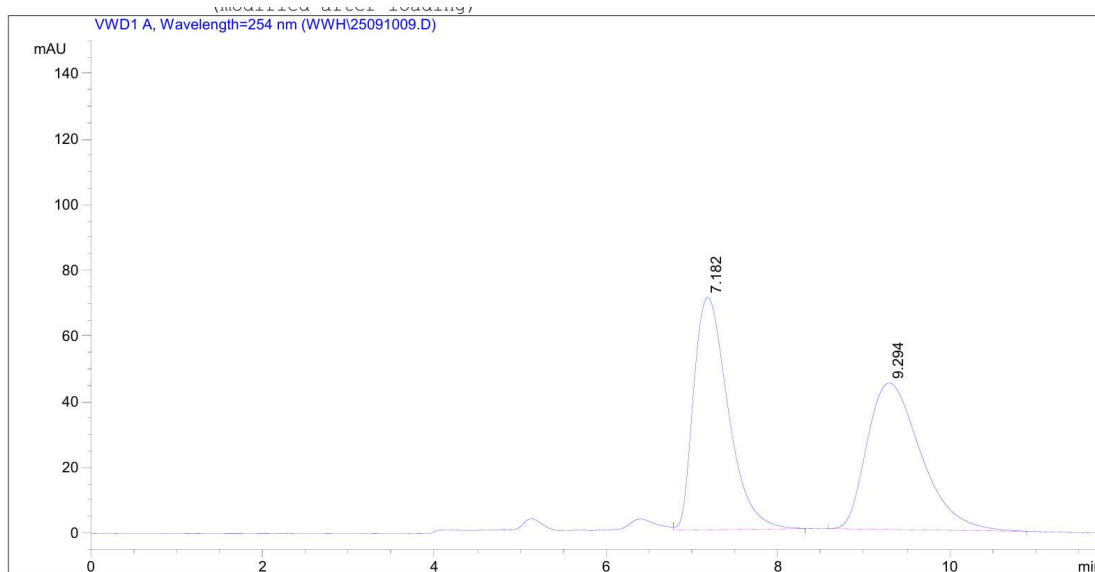

| Peak # | RetTime [min] | Type | Width [min] | Area mAU *s | Height [mAU] | Area %  |
|--------|---------------|------|-------------|-------------|--------------|---------|
| 1      | 7.182         | VB   | 0.4365      | 1977.64282  | 70.80798     | 50.4170 |
| 2      | 9.294         | BB   | 0.6725      | 1944.92480  | 44.66753     | 49.5830 |

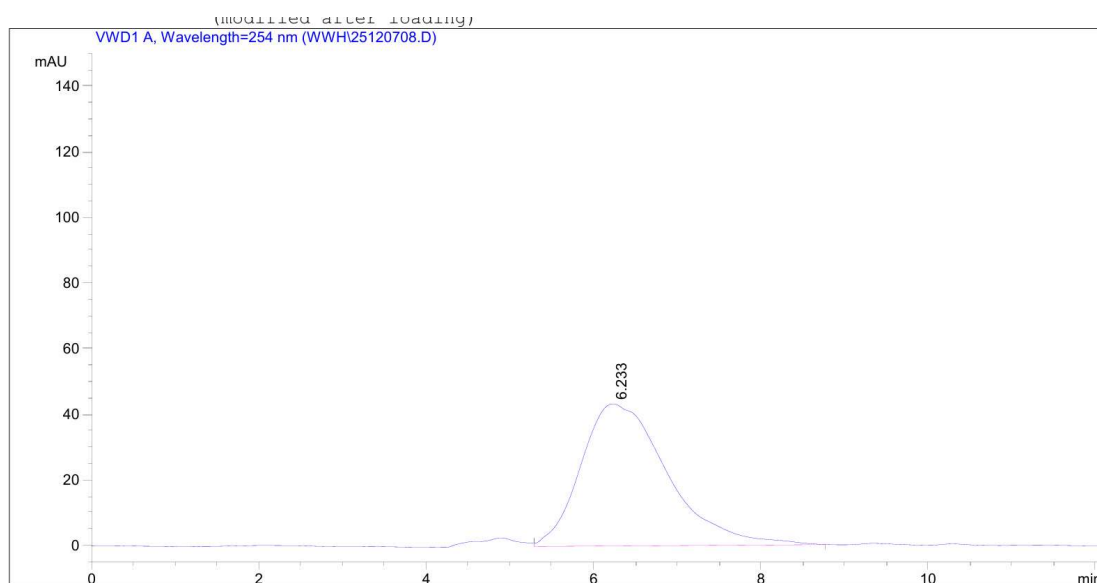

| Peak # | RetTime [min] | Type | Width [min] | Area mAU *s | Height [mAU] | Area %   |
|--------|---------------|------|-------------|-------------|--------------|----------|
| 1      | 6.233         | VB   | 0.9922      | 3130.54761  | 43.36574     | 100.0000 |

**4-(2-(tert-butyl)phenyl)-1-(4-(2-chlorobenzyl)-5-oxo-1,3-diphenyl-4,5-dihydro-1H-pyrazol-4-yl)-1,2,4-triazolidine-3,5-dione(3ta)**

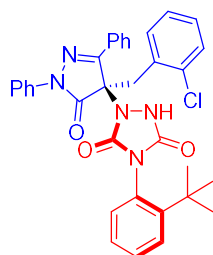

**3ta**

White solid, mp 245-247 °C, 85% yield, > 99% ee, dr = 10:1.  $[\alpha]_D^{25} = +3.917$  (c = 0.4, CH<sub>2</sub>Cl<sub>2</sub>). <sup>1</sup>H NMR (400 MHz, CDCl<sub>3</sub>) δ 9.20 (s, 1H), 8.13 - 8.06 (m, 2H), 7.67 - 7.57 (m, 2H), 7.57 - 7.44 (m, 4H), 7.42 - 7.16 (m, 6H), 7.15 - 7.10 (m, 1H), 7.03 (dd, *J* = 7.8, 1.5 Hz, 1H), 6.94 - 6.88 (m, 2H), 4.09 (d, *J* = 12.9 Hz, 1H), 4.05 - 3.94 (m, 1H), 1.17 (s, 9H). <sup>13</sup>C NMR (101 MHz, CDCl<sub>3</sub>) δ 169.2, 156.1, 153.4, 153.3, 150.1, 149.1, 136.6, 131.5, 130.4, 130.1, 130.0, 129.7, 129.0, 128.7, 128.5, 128.4, 128.2, 128.1, 127.6, 126.3, 120.6, 71.9, 39.7, 35.3, 31.1. HRMS (ESI) m/z:

$[M + Na]^+$  Calcd for C<sub>34</sub>H<sub>30</sub>ClN<sub>5</sub>NaO<sub>3</sub>, 614.1935; Found 614.1921. The enantiomeric ratio was determined by HPLC analysis on a chiral AD-H column. *n*-Hexane/*i*-PrOH = 7:3, flow rate = 0.8 mL/min., λ = 254 nm, t<sub>R</sub> = 8.2 min. (major).

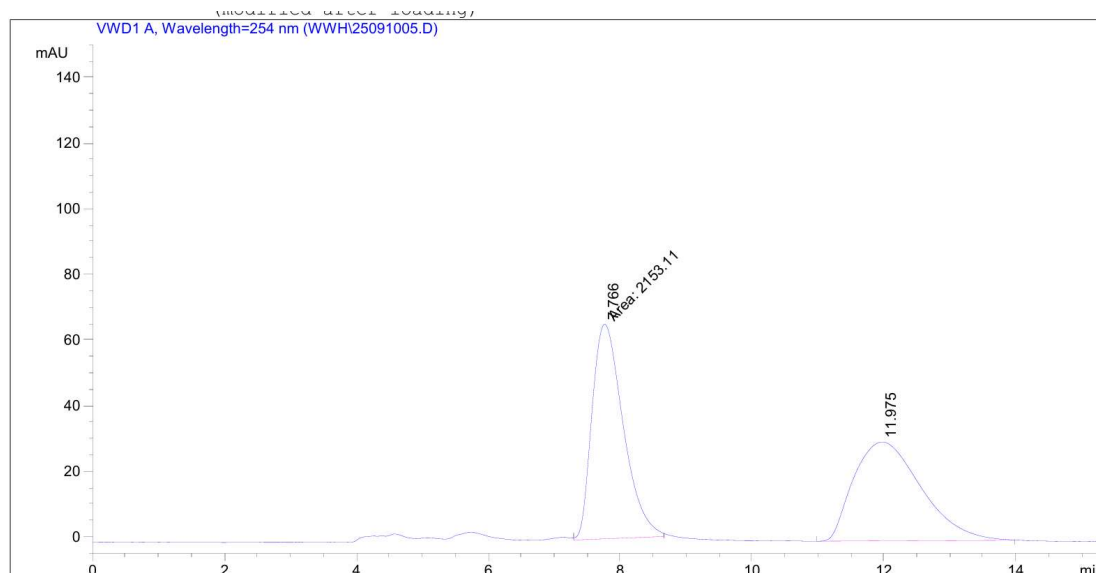

| Peak # | RetTime [min] | Type | Width [min] | Area mAU *s | Height [mAU] | Area %  |
|--------|---------------|------|-------------|-------------|--------------|---------|
| 1      | 7.766         | MM   | 0.5482      | 2153.10596  | 65.46516     | 50.1117 |
| 2      | 11.975        | PB   | 1.1193      | 2143.50879  | 30.14425     | 49.8883 |

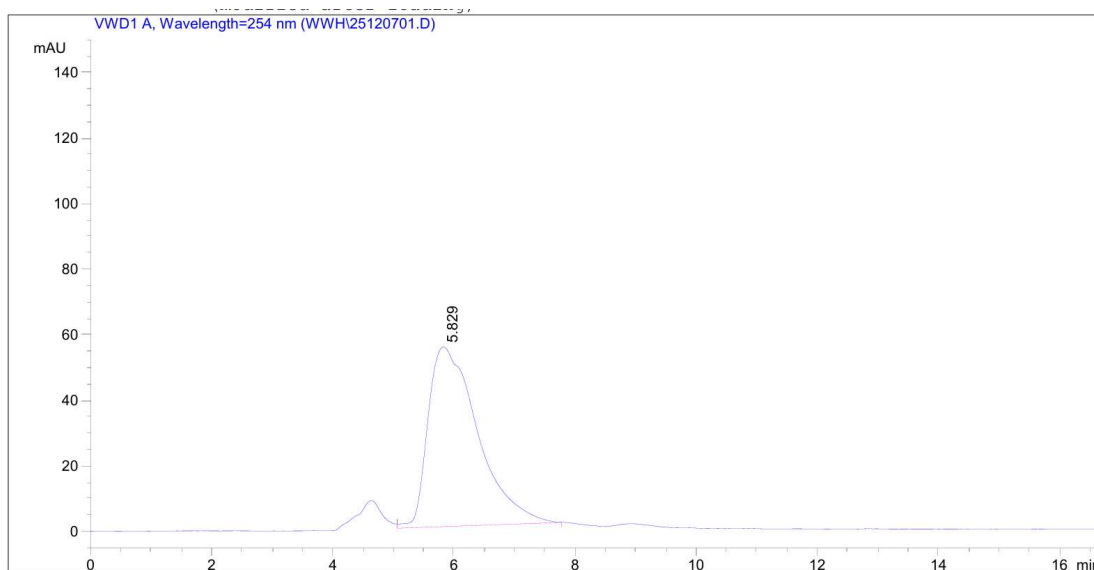

| Peak # | RetTime [min] | Type | Width [min] | Area mAU *s | Height [mAU] | Area %   |
|--------|---------------|------|-------------|-------------|--------------|----------|
| 1      | 5.829         | VB   | 0.7890      | 3131.16943  | 54.79317     | 100.0000 |

**1-(4-(3-bromobenzyl)-5-oxo-1,3-diphenyl-4,5-dihydro-1H-pyrazol-4-yl)-4-(2-(tert-butyl)phenyl)-1,2,4-triazolidine-3,5-dione(3ua)**

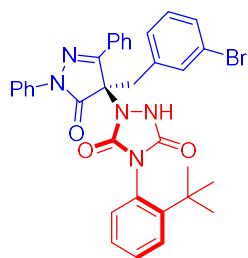

**3ua**

White solid, mp 151-153 °C, 83% yield, > 99% ee, dr = 10:1.  $[\alpha]_D^{25} = +0.725$  (c = 0.1, CH<sub>2</sub>Cl<sub>2</sub>). <sup>1</sup>H NMR (400 MHz, CDCl<sub>3</sub>) δ 9.29 (s, 1H), 8.15 -8.11 (m, 2H), 7.65 (ddd, J = 7.7, 4.4, 1.6 Hz, 2H), 7.57 (ddd, J = 14.6, 7.9, 6.3 Hz, 3H), 7.50 -7.44 (m, 1H), 7.41 -7.31 (m, 3H), 7.29 -7.22 (m, 3H), 7.15 -7.08 (m, 2H), 6.95 (dd, J = 7.5, 2.0 Hz, 1H), 6.81 (d, J = 7.7 Hz, 1H), 4.11 -3.98 (m, 2H), 1.48 (s, 9H). <sup>13</sup>C NMR (101 MHz, CDCl<sub>3</sub>) δ 170.0, 156.1, 152.6, 148.9, 132.5, 131.4, 130.5, 130.0, 129.9, 128.8, 128.8, 128.6, 128.6, 128.3, 128.3, 128.2,

128.1, 127.7, 126.4, 125.5, 120.4, 71.7, 39.6, 35.3, 31.3, 31.3. HRMS (ESI) m/z: [M + Na]<sup>+</sup> Calcd for C<sub>34</sub>H<sub>30</sub>BrN<sub>5</sub>NaO<sub>3</sub>, 658.1430; Found 658.1423. The enantiomeric ratio was determined by HPLC analysis on a chiral AD-H column. *n*-Hexane/*i*-PrOH = 15:2, flow rate = 0.8 mL/min., λ = 254 nm, t<sub>R</sub> = 7.9 min. (minor), 10.5 min. (major).

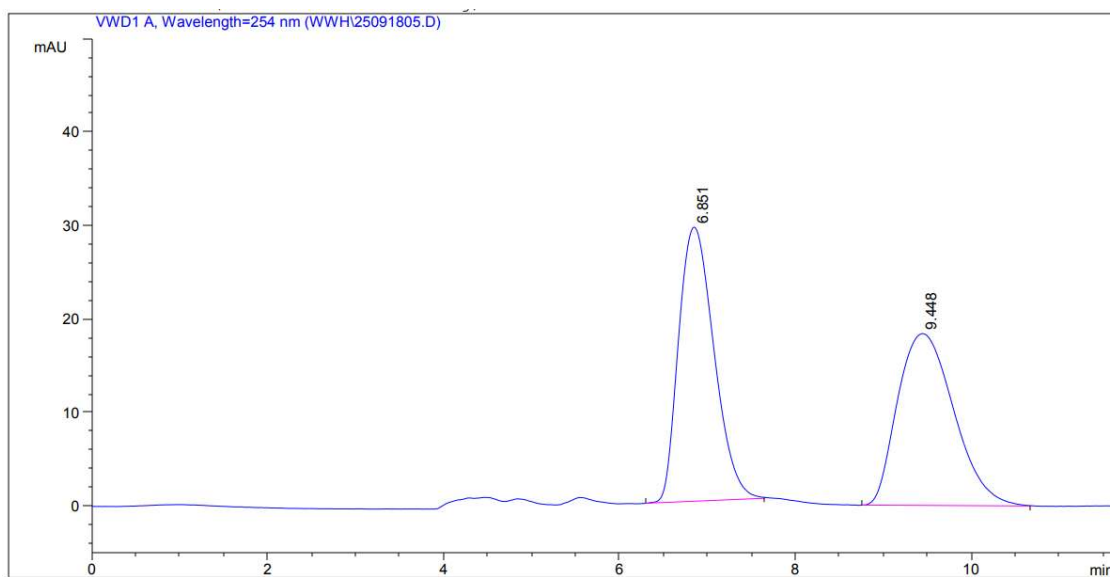

| Peak # | RetTime [min] | Type | Width [min] | Area mAU  | *s | Height [mAU] | Area %  |
|--------|---------------|------|-------------|-----------|----|--------------|---------|
| 1      | 6.851         | BB   | 0.4450      | 822.62286 |    | 29.34192     | 50.1283 |
| 2      | 9.448         | PB   | 0.7028      | 818.41113 |    | 18.38618     | 49.8717 |

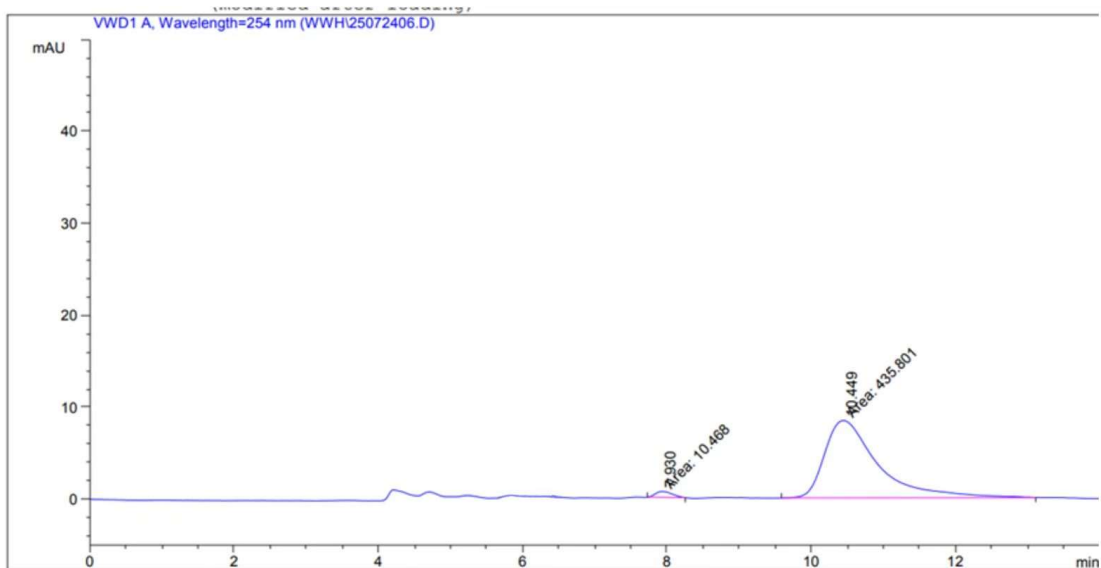

| Peak # | RetTime [min] | Type | Width [min] | Area mAU  | *s | Height [mAU] | Area %  |
|--------|---------------|------|-------------|-----------|----|--------------|---------|
| 1      | 7.930         | MM   | 0.2725      | 10.46797  |    | 6.40325e-1   | 2.3457  |
| 2      | 10.449        | MM   | 0.8613      | 435.80139 |    | 8.43319      | 97.6543 |

4-(2-(tert-butyl)phenyl)-1-(4-(3-methylbenzyl)-5-oxo-1,3-diphenyl-4,5-dihydro-1H-pyrazol-4-yl)-1,2,4-triazolidine-3,5-dione (3va)

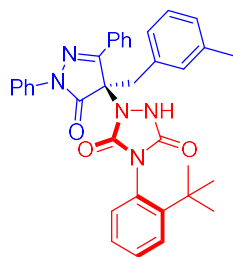

3va

White solid, mp 152-154 °C, 80% yield, 86% ee, dr = 12:1.  $[\alpha]_D^{25} = +5.067$  (c = 0.7, CH<sub>2</sub>Cl<sub>2</sub>). <sup>1</sup>H NMR (400 MHz, CDCl<sub>3</sub>) δ 9.40 (s, 1H), 8.12 -8.03 (m, 2H), 7.53 - 7.45 (m, 4H), 7.29 (d, *J* = 7.0 Hz, 2H), 7.26 -6.90 (m, 10H), 3.92 - 3.83 (m, 2H), 2.28 (s, 3H), 1.12 (s, 9H). <sup>13</sup>C NMR (101 MHz, CDCl<sub>3</sub>) δ 170.0, 156.1, 153.5, 153.1, 149.1, 138.7, 136.7, 131.5, 131.0, 130.4, 130.2, 130.1, 129.7, 129.2, 128.5, 128.4, 128.3, 128.2, 127.6, 127.1, 126.7, 121.1, 117.8, 71.9, 39.6, 35.3, 31.2, 21.4. HRMS (ESI) *m/z*: [M + Na]<sup>+</sup> Calcd for C<sub>34</sub>H<sub>30</sub>BrN<sub>5</sub>NaO<sub>3</sub>, 658.1430;

Found 658.1423. The enantiomeric ratio was determined by HPLC analysis on a chiral AD-H column. *n*-Hexane/*i*-PrOH = 8:2, flow rate = 0.8 mL/min., λ = 254 nm, *t*<sub>R</sub> = 9.0 min. (major).

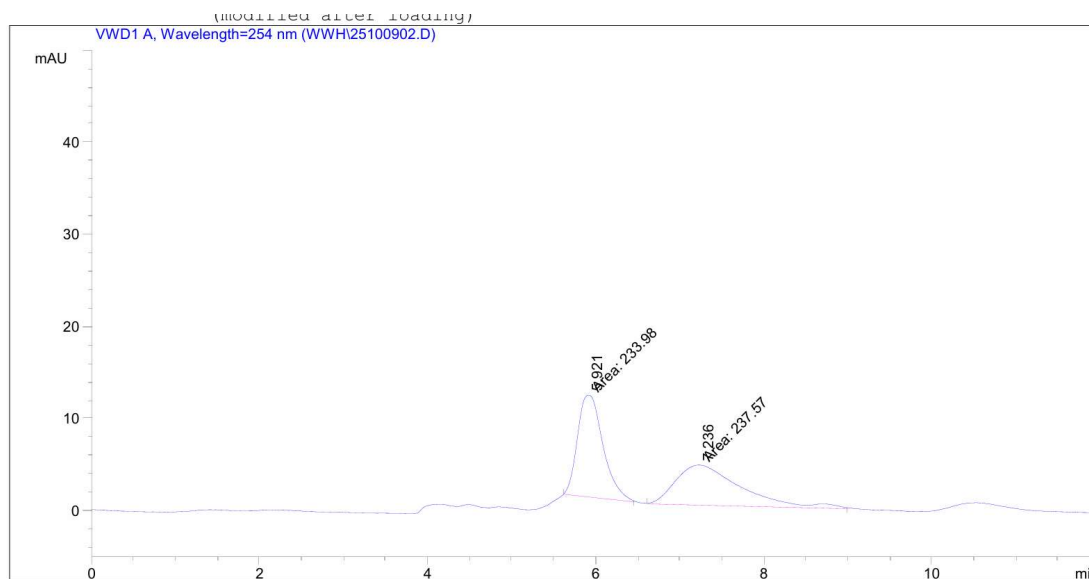

| Peak # | RetTime [min] | Type | Width [min] | Area mAU*s | Height [mAU] | Area %  |
|--------|---------------|------|-------------|------------|--------------|---------|
| 1      | 5.921         | MM   | 0.3520      | 233.98009  | 11.07988     | 49.6194 |
| 2      | 7.236         | MM   | 0.9065      | 237.56998  | 4.36778      | 50.3806 |

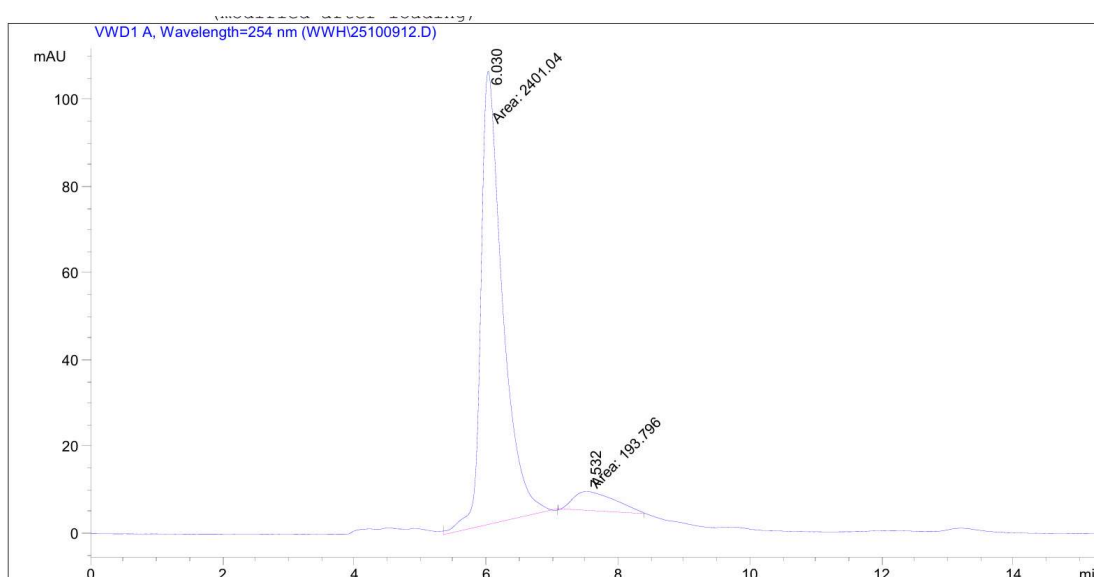

| Peak # | RetTime [min] | Type | Width [min] | Area mAU *s | Height [mAU] | Area %  |
|--------|---------------|------|-------------|-------------|--------------|---------|
| 1      | 6.030         | MM   | 0.3826      | 2401.04053  | 104.58047    | 92.5315 |
| 2      | 7.532         | MM   | 0.7399      | 193.79587   | 4.36530      | 7.4685  |

**4-(2-(tert-butyl)phenyl)-1-(4-(4-methylbenzyl)-5-oxo-1,3-diphenyl-4,5-dihydro-1H-pyrazol-4-yl)-1,2,4-triazolidine-3,5-dione (3wa)**

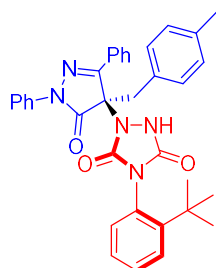

**3wa**

White solid, mp 145-147 °C, 85% yield, 90% ee, dr = 13:1.  $[\alpha]_D^{25} = -0.585$  (c = 0.4, CH<sub>2</sub>Cl<sub>2</sub>). <sup>1</sup>H NMR (400 MHz, CDCl<sub>3</sub>) δ 8.14 - 8.06 (m, 2H), 7.57 - 7.48 (m, 4H), 7.41 - 7.36 (m, 3H), 7.31 - 7.02 (m, 8H), 6.98 (dd, *J* = 11.5, 7.5 Hz, 2H), 3.92 (d, *J* = 12.5 Hz, 1H), 3.87 (d, *J* = 12.3 Hz, 1H), 2.33 (d, *J* = 6.2 Hz, 3H), 1.15 (s, 9H). <sup>13</sup>C NMR (101 MHz, CDCl<sub>3</sub>) δ 178.1, 169.9, 156.1, 153.8, 153.0, 149.0, 135.4, 131.4, 131.3, 131.2, 130.4, 130.0, 129.4, 129.3, 128.8, 128.5, 128.3, 128.3, 128.3, 127.6, 126.8, 121.3, 71.8, 39.7, 35.3, 31.2, 29.6. HRMS (ESI) *m/z*: [M + Na]<sup>+</sup> Calcd for C<sub>35</sub>H<sub>33</sub>N<sub>5</sub>NaO<sub>3</sub>, 594.2481; Found 594.2473. The enantiomeric ratio was determined by HPLC analysis on a chiral AD-H column. *n*-Hexane/*i*-PrOH = 3:2, flow rate = 0.8 mL/min., λ = 254 nm, *t<sub>R</sub>* = 7.1 min. (minor), 4.6 min. (major).

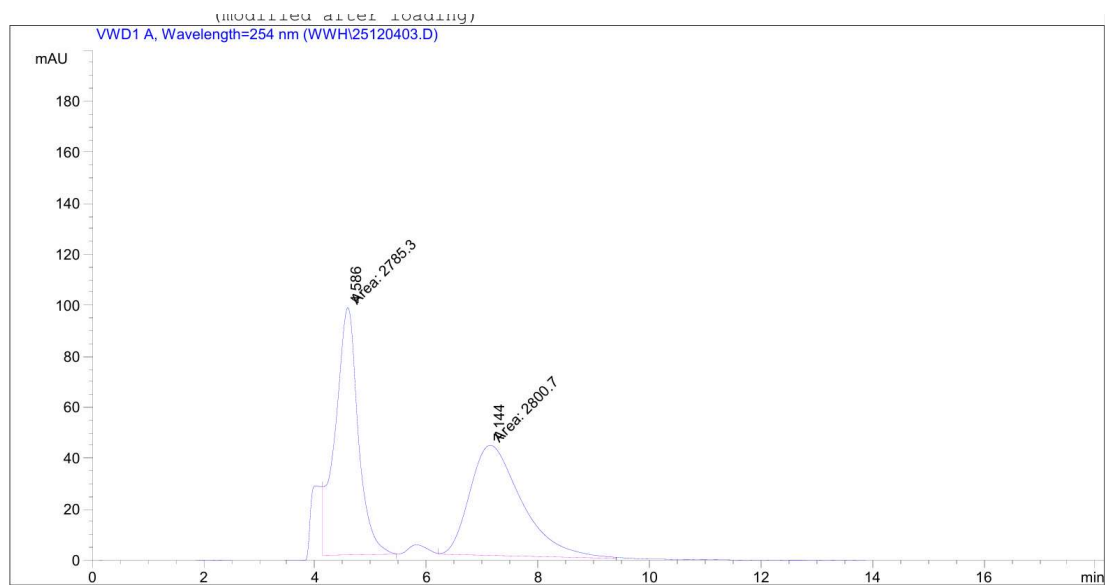

| Peak # | RetTime [min] | Type | Width [min] | Area mAU *s | Height [mAU] | Area %  |
|--------|---------------|------|-------------|-------------|--------------|---------|
| 1      | 4.586         | MM   | 0.4782      | 2785.30420  | 97.07089     | 49.8622 |
| 2      | 7.144         | MM   | 1.0792      | 2800.69971  | 43.25322     | 50.1378 |

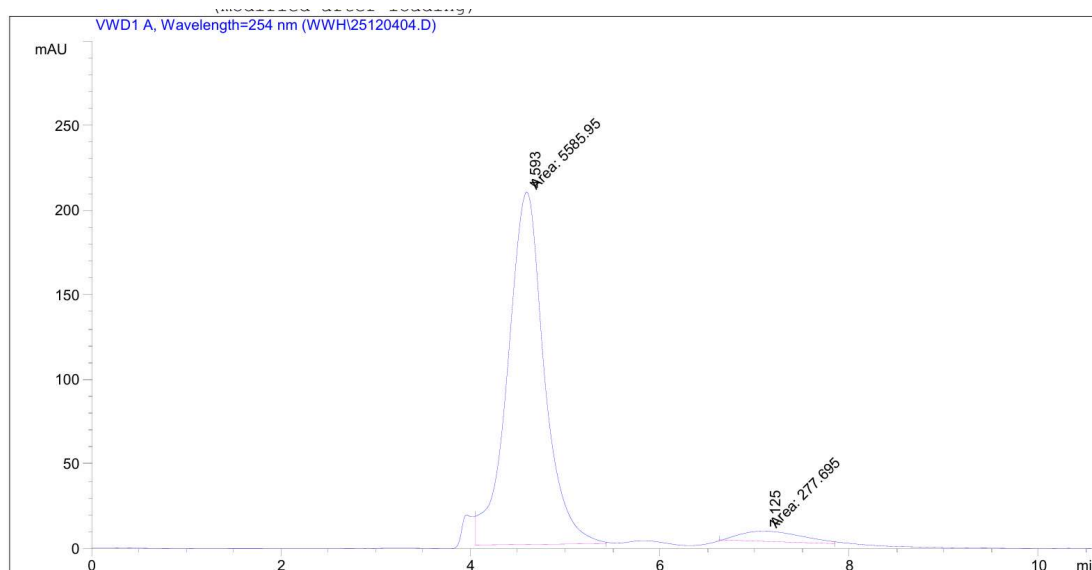

| Peak # | RetTime [min] | Type | Width [min] | Area mAU *s | Height [mAU] | Area %  |
|--------|---------------|------|-------------|-------------|--------------|---------|
| 1      | 4.593         | MM   | 0.4471      | 5585.95361  | 208.21674    | 95.2641 |
| 2      | 7.125         | MM   | 0.7565      | 277.69528   | 6.11781      | 4.7359  |

**4-(2-(tert-butyl)phenyl)-1-(4-(4-chlorobenzyl)-5-oxo-1,3-diphenyl-4,5-dihydro-1H-pyrazol-4-yl)-1,2,4-triazolidine-3,5-dione (3xa)**

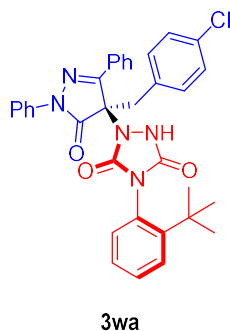

White solid, mp 125-127 °C, 85% yield, > 99% ee, dr = 12:1.  $[\alpha]_D^{25} = +8.931$  (c = 0.5, CH<sub>2</sub>Cl<sub>2</sub>). <sup>1</sup>H NMR (400 MHz, CDCl<sub>3</sub>) δ 8.06 -7.97 (m, 2H), 7.55 -7.39 (m, 6H), 7.38 -7.09 (m, 6H), 7.06 -6.93 (m, 3H), 6.86 -6.75 (m, 2H), 3.91 -3.79 (m, 1H), 3.75 (d, *J* = 12.7 Hz, 1H), 1.10 (s, 9H) <sup>13</sup>C NMR (101 MHz, CDCl<sub>3</sub>) δ 169.9, 156.0, 153.3, 153.2, 149.1, 136.7, 134.2, 131.4, 131.4, 131.2, 130.4, 129.5, 129.3, 128.8, 128.6, 128.5, 128.4, 127.6, 126.6, 126.4, 120.2, 71.8, 38.9, 35.3, 31.2. HRMS (ESI) *m/z*: [M + Na]<sup>+</sup> Calcd for C<sub>34</sub>H<sub>30</sub>ClN<sub>5</sub>NaO<sub>3</sub>, 614.1935; Found 614.1927. The enantiomeric ratio was determined by HPLC analysis on a chiral

AD-H column. *n*-Hexane/*i*-PrOH = 3:2, flow rate = 0.8 mL/min., λ = 254 nm, t<sub>R</sub> = 6.2 min. (major).

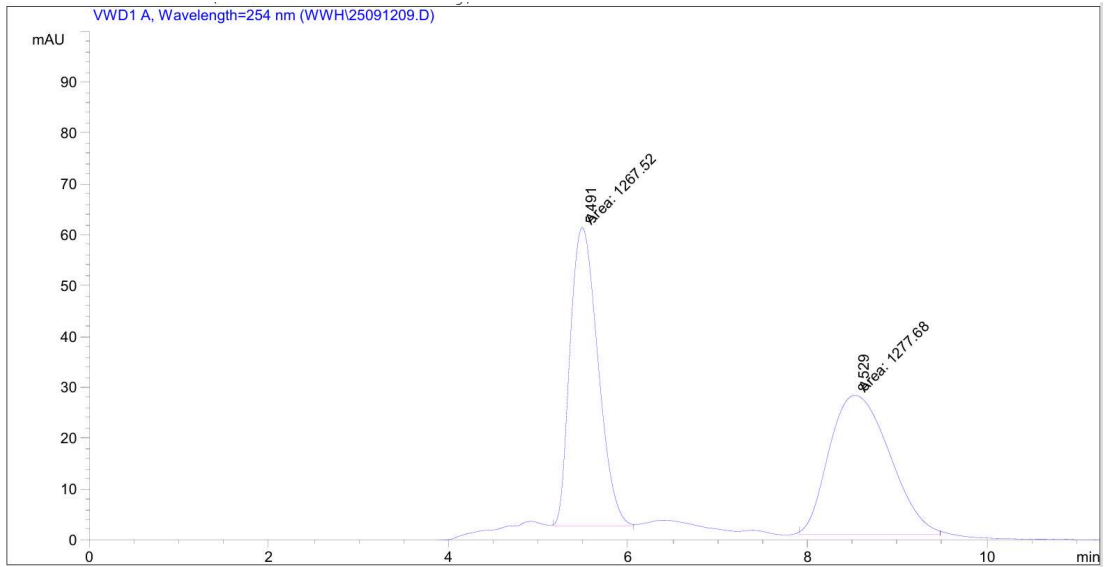

| Peak # | RetTime [min] | Type | Width [min] | Area mAU *s | Height [mAU] | Area %  |
|--------|---------------|------|-------------|-------------|--------------|---------|
| 1      | 5.491         | MM   | 0.3600      | 1267.51648  | 58.67917     | 49.8003 |
| 2      | 8.529         | MM   | 0.7786      | 1277.68384  | 27.35143     | 50.1997 |

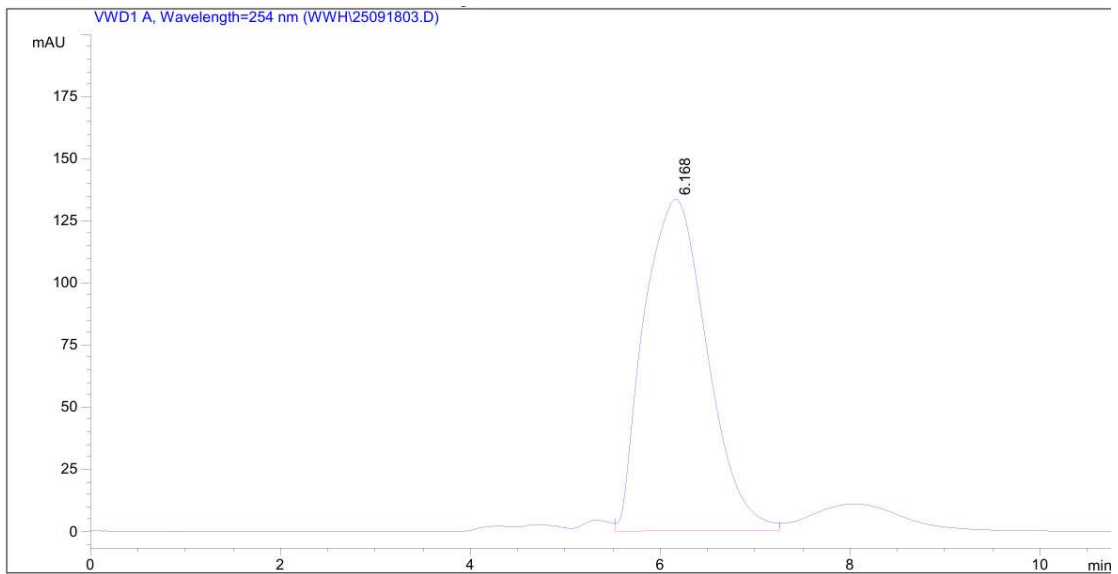

| Peak # | RetTime [min] | Type | Width [min] | Area mAU *s | Height [mAU] | Area %   |
|--------|---------------|------|-------------|-------------|--------------|----------|
| 1      | 6.168         | VV   | 0.7608      | 6154.94971  | 133.45183    | 100.0000 |

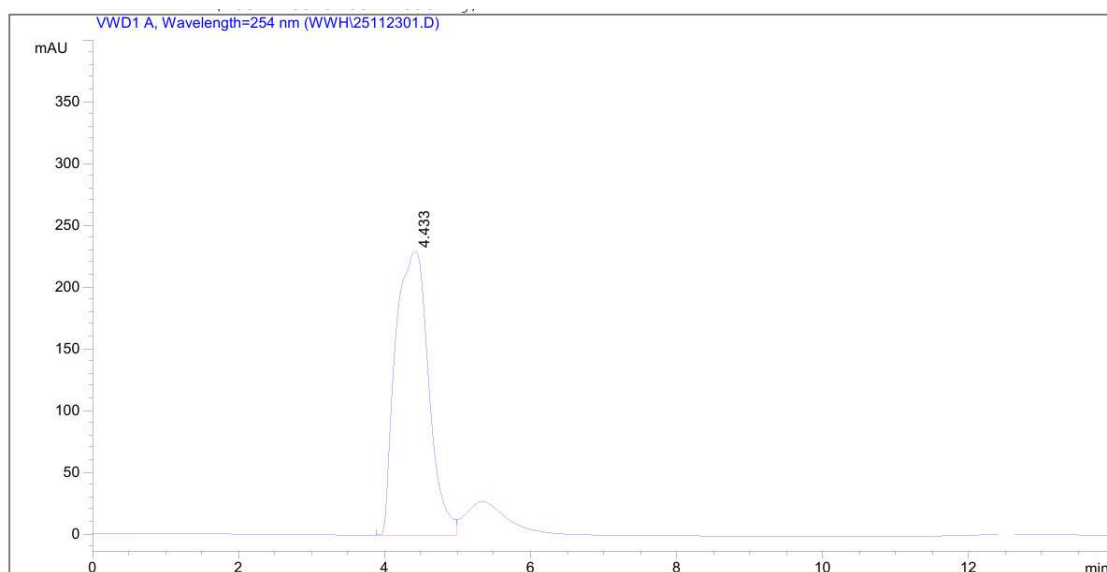

| Peak # | RetTime [min] | Type | Width [min] | Area mAU *s | Height [mAU] | Area %   |
|--------|---------------|------|-------------|-------------|--------------|----------|
| 1      | 4.433         | BV   | 0.4343      | 7193.96875  | 229.41437    | 100.0000 |

**1-(4-(4-bromobenzyl)-5-oxo-1,3-diphenyl-4,5-dihydro-1H-pyrazol-4-yl)-4-(2-(tert-butyl)phenyl)-1,2,4-triazolidine-3,5-dione (3ya)**

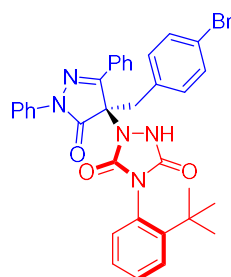

**3ya**

White solid, mp 134-136 °C, 83% yield, 80% ee, dr = 13:1.  $[\alpha]_D^{25} = +2$  (c = 0.1, CH<sub>2</sub>Cl<sub>2</sub>). <sup>1</sup>H NMR (400 MHz, CDCl<sub>3</sub>) δ 8.90 (s, 1H), 8.11 - 8.04 (m, 2H), 7.58 - 7.50 (m, 6H), 7.41 - 7.34 (m, 3H), 7.28 (d, *J* = 2.9 Hz, 1H), 7.23 (dd, *J* = 7.8, 4.5 Hz, 3H), 7.04 (d, *J* = 7.8 Hz, 1H), 6.81 (d, *J* = 8.1 Hz, 2H), 3.90 (d, *J* = 12.7 Hz, 1H), 3.81 (d, *J* = 12.6 Hz, 1H), 1.16 (s, 9H). <sup>13</sup>C NMR (101 MHz, CDCl<sub>3</sub>) δ 170.0, 156.2, 153.4, 153.2, 149.0, 136.7, 131.7, 131.4, 131.3, 130.5, 129.3, 129.2, 128.9, 128.6, 128.2, 127.6, 126.6, 126.4, 122.4, 120.3, 71.7, 38.9, 35.3, 31.2.

HRMS (ESI) *m/z*: [M + Na]<sup>+</sup> Calcd for C<sub>34</sub>H<sub>30</sub>BrN<sub>5</sub>NaO<sub>3</sub>, 658.1430; Found 658.1428. The enantiomeric ratio was determined by HPLC analysis on a chiral AD-H column. *n*-Hexane/*i*-PrOH = 3:2, flow rate = 0.8 mL/min., λ = 254 nm, *t<sub>R</sub>* = 8.5 min. (minor), 6.4 min. (major).

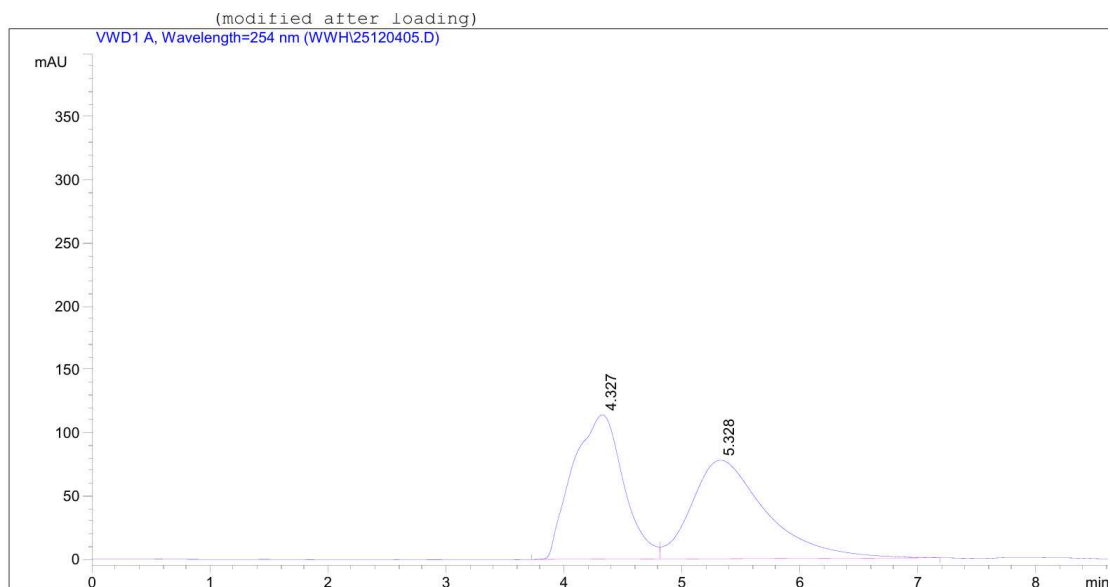

| Peak # | RetTime [min] | Type | Width [min] | Area mAU *s | Height [mAU] | Area %  |
|--------|---------------|------|-------------|-------------|--------------|---------|
| 1      | 4.327         | BV   | 0.4144      | 3417.57080  | 114.29707    | 49.9766 |
| 2      | 5.328         | VB   | 0.6470      | 3420.77734  | 78.00625     | 50.0234 |

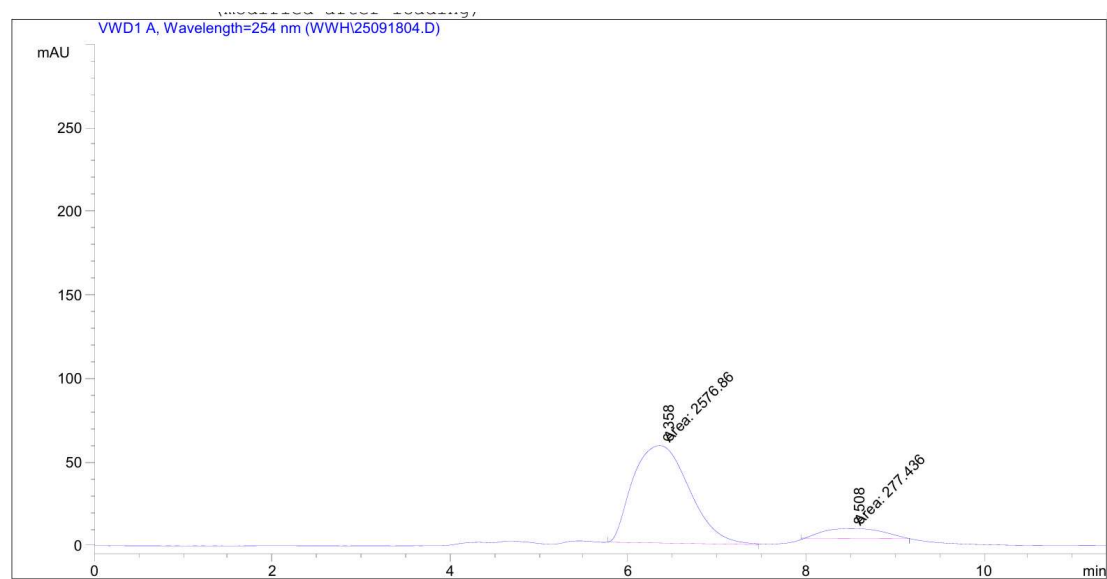

| Peak # | RetTime [min] | Type | Width [min] | Area mAU *s | Height [mAU] | Area %  |
|--------|---------------|------|-------------|-------------|--------------|---------|
| 1      | 6.358         | MM   | 0.7358      | 2576.85596  | 58.36792     | 90.2800 |
| 2      | 8.508         | MM   | 0.7804      | 277.43579   | 5.92484      | 9.7200  |

**1-(4-(3,5-bis(trifluoromethyl)benzyl)-5-oxo-1,3-diphenyl-4,5-dihydro-1H-pyrazol-4-yl)-4-(2-(tert-butyl)phenyl)-1,2,4-triazolidine-3,5-dione (3za)**

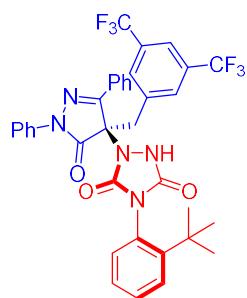

**3za**

White solid, mp 148-150 °C, 85% yield, 90% ee, dr = 10:1.  $[\alpha]_D^{25} = +30.963$  ( $c = 0.5$ ,  $\text{CH}_2\text{Cl}_2$ ).  $^1\text{H NMR}$  (400 MHz,  $\text{CDCl}_3$ )  $\delta$  8.49 (s, 1H), 7.95 (d,  $J = 7.5$  Hz, 2H), 7.61 (s, 1H), 7.51 - 7.43 (m, 6H), 7.36 - 7.32 (m, 1H), 7.26 (s, 6H), 7.16 - 7.12 (m, 1H), 6.98 (d,  $J = 7.7$  Hz, 1H), 4.10 (d,  $J = 12.9$  Hz, 1H), 3.82 (d,  $J = 12.8$  Hz, 1H), 1.21 (s, 9H).  $^{13}\text{C NMR}$  (101 MHz,  $\text{DMSO}-d_6$ )  $\delta$  170.1, 154.0, 149.0, 136.7, 134.6, 132.1, 132.1, 132.0, 131.9, 131.2, 131.2, 131.2, 131.1, 130.9, 130.6, 130.5, 130.2, 129.8, 129.4, 129.3, 129.0 (d,  $J = 28.1$  Hz), 127.9 (q,  $J = 3.5$  Hz), 127.3, 126.5, 125.7 (d,  $J = 222.0$  Hz), 124.0, 122.5 (q,  $J = 4.2$  Hz), 121.9, 119.0, 40.9, 38.8, 35.4, 31.4.  $^{19}\text{F NMR}$  (377 MHz,  $\text{CDCl}_3$ )  $\delta$  -63.14. HRMS (ESI)  $m/z$ :  $[\text{M} + \text{Na}]^+$  Calcd for  $\text{C}_{36}\text{H}_{29}\text{F}_6\text{N}_5\text{NaO}_3$ , 716.2072; Found 716.2062. The enantiomeric ratio was determined by HPLC analysis on a chiral AD-H column.  $n$ -Hexane/ $i$ -PrOH = 8:2, flow rate = 0.8 mL/min.,  $\lambda = 254$  nm,  $t_R = 6.1$  min. (minor), 4.9 min. (major).

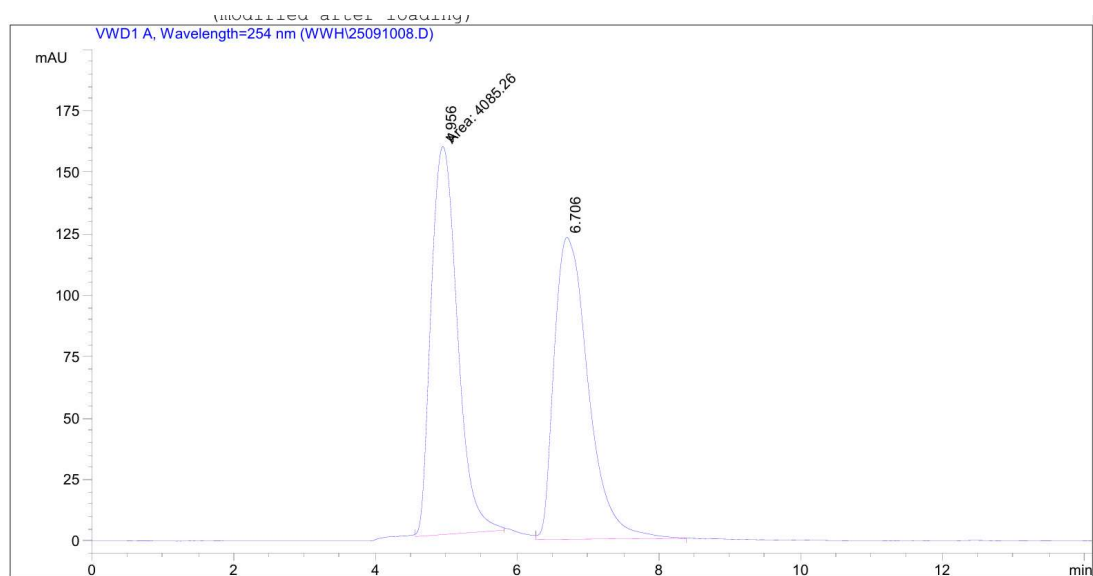

| Peak # | RetTime [min] | Type | Width [min] | Area mAU *s | Height [mAU] | Area %  |
|--------|---------------|------|-------------|-------------|--------------|---------|
| 1      | 4.956         | MM   | 0.4310      | 4085.26245  | 157.99005    | 49.7688 |
| 2      | 6.706         | VB   | 0.5283      | 4123.22607  | 122.90296    | 50.2312 |

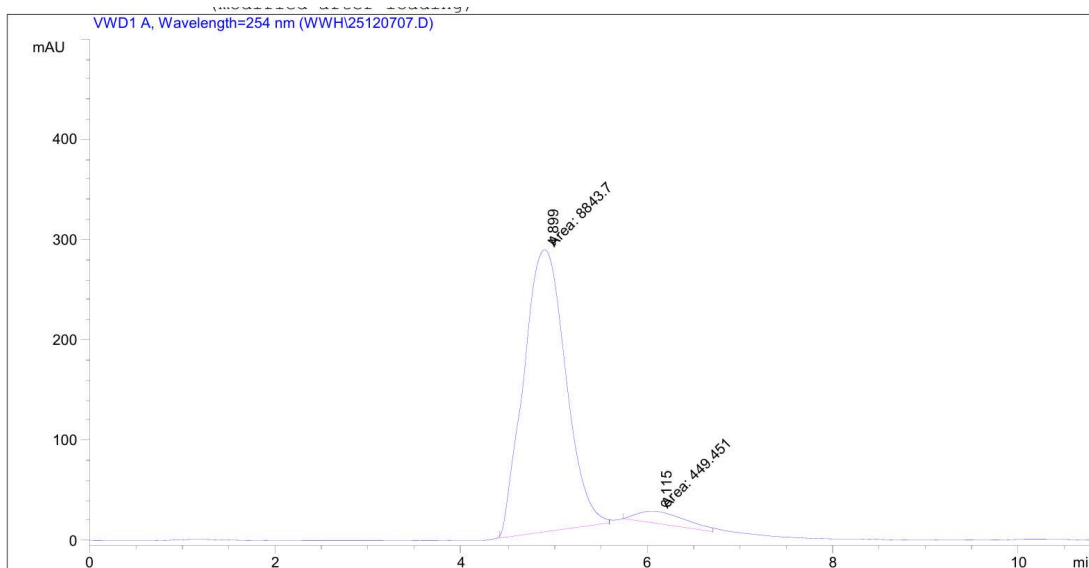

| Peak # | RetTime [min] | Type | Width [min] | Area mAU *s | Height [mAU] | Area %  |
|--------|---------------|------|-------------|-------------|--------------|---------|
| 1      | 4.899         | MM   | 0.5241      | 8843.70117  | 281.24863    | 95.1636 |
| 2      | 6.115         | MM   | 0.6189      | 449.45132   | 12.10271     | 4.8364  |

**1-(4-benzyl-5-oxo-1,3-diphenyl-4,5-dihydro-1H-pyrazol-4-yl)-4-(4-bromo-2-(tert-butyl)phenyl)-1,2,4-triazolidine-3,5-dione (3ab)**

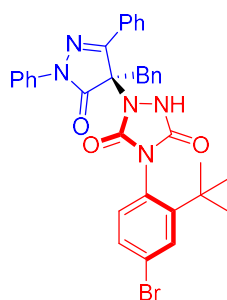

**3ab**

White solid, mp 151-153 °C, 85% yield, 99% ee, dr = 18:1.  $[\alpha]_D^{25} = +0.917$  (c = 0.1, CH<sub>2</sub>Cl<sub>2</sub>). <sup>1</sup>H NMR (500 MHz, CDCl<sub>3</sub>) δ 9.18 (s, 1H), 8.07 - 8.01 (m, 2H), 7.60 (d, *J* = 2.3 Hz, 1H), 7.53 - 7.45 (m, 5H), 7.33 - 7.26 (m, 3H), 7.18 - 7.13 (m, 2H), 7.09 - 7.06 (m, 2H), 6.95 (d, *J* = 7.2 Hz, 2H), 6.84 (d, *J* = 8.3 Hz, 1H), 3.92 (d, *J* = 12.6 Hz, 1H), 3.85 (d, *J* = 12.7 Hz, 1H), 1.11 (s, 9H). <sup>13</sup>C NMR (101 MHz, CDCl<sub>3</sub>) δ 169.9, 155.6, 153.5, 152.7, 151.4, 136.7, 133.1, 131.9, 131.1, 130.8, 130.0, 129.5, 129.3, 128.8, 128.3, 128.3, 127.6, 126.7, 126.3, 124.8, 120.5, 72.0, 39.7, 35.5, 30.9. HRMS (ESI) *m/z*: [M + Na]<sup>+</sup> Calcd for C<sub>34</sub>H<sub>30</sub>BrN<sub>5</sub>NaO<sub>3</sub>, 658.1430; Found 658.1427. The enantiomeric ratio was determined by HPLC analysis on a chiral AD-H column. *n*-Hexane/*i*-PrOH = 15:2, flow rate = 0.8 mL/min., λ = 254 nm, t<sub>R</sub> = 8.9 min. (major).

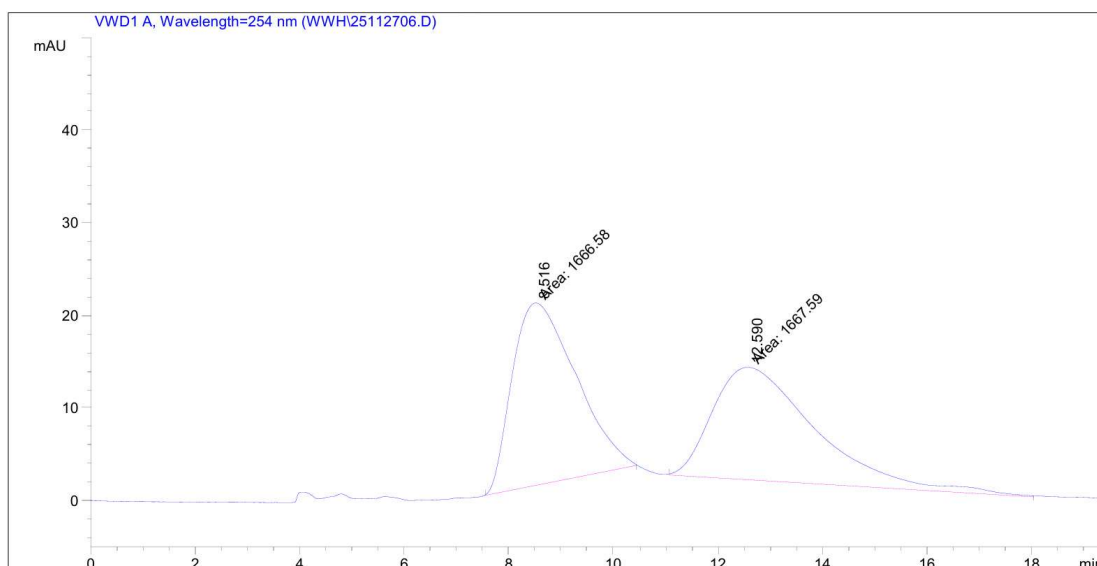

| Peak # | RetTime [min] | Type | Width [min] | Area mAU *s | Height [mAU] | Area %  |
|--------|---------------|------|-------------|-------------|--------------|---------|
| 1      | 8.516         | MM   | 1.4101      | 1666.58044  | 19.69799     | 49.9848 |
| 2      | 12.590        | MM   | 2.2858      | 1667.59143  | 12.15881     | 50.0152 |

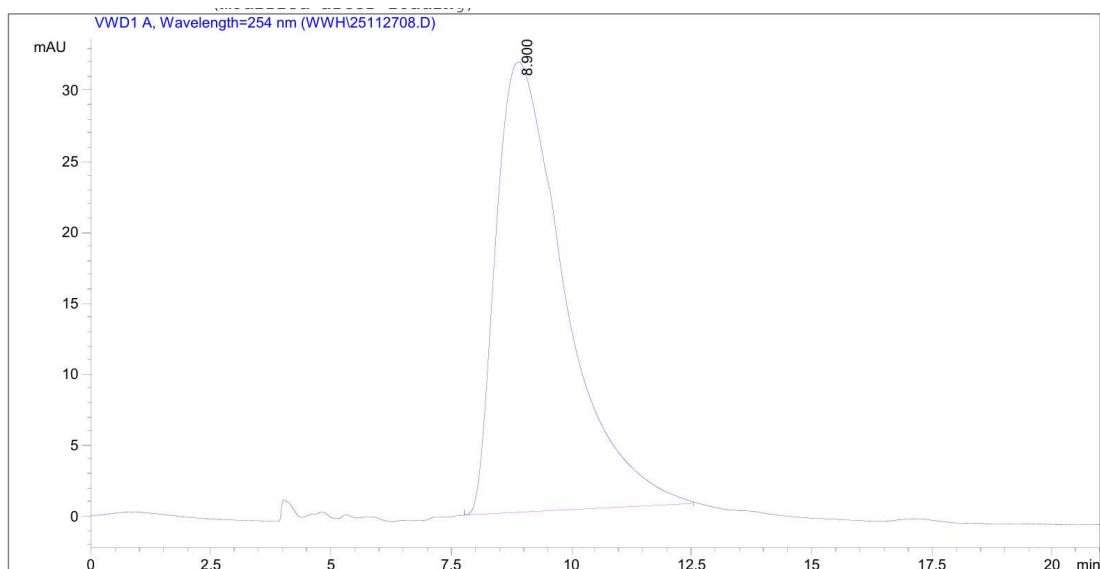

| Peak # | RetTime [min] | Type | Width [min] | Area mAU *s | Height [mAU] | Area %   |
|--------|---------------|------|-------------|-------------|--------------|----------|
| 1      | 8.900         | PB   | 1.4167      | 3156.36182  | 31.73330     | 100.0000 |

**1-(4-benzyl-5-oxo-1,3-diphenyl-4,5-dihydro-1H-pyrazol-4-yl)-4-(2-(tert-butyl)-4-iodophenyl)-1,2,4-triazolidine-3,5-dione(3ac)**

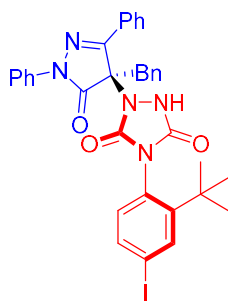

**3ac**

White solid, mp 142-144 °C, 83% yield, 99% ee, dr = 18:1.  $[\alpha]_D^{25} = +3.047$  (c = 0.2, CH<sub>2</sub>Cl<sub>2</sub>). <sup>1</sup>H NMR (400 MHz, CDCl<sub>3</sub>) δ 9.50 (s, 1H), 8.06 (d, *J* = 7.5 Hz, 2H), 7.57 - 7.48 (m, 6H), 7.40 - 7.33 (m, 3H), 7.28 (s, 1H), 7.23 (dd, *J* = 8.3, 3.6 Hz, 3H), 7.05 (d, *J* = 7.7 Hz, 1H), 6.79 (d, *J* = 7.9 Hz, 2H), 3.92 - 3.76 (m, 2H), 1.13 (s, 9H). <sup>13</sup>C NMR (101 MHz, CDCl<sub>3</sub>) δ 169.2, 156.1, 153.4, 150.2, 149.1, 136.6, 133.5, 131.5, 130.4, 130.1, 129.7, 129.0, 128.7, 128.6, 128.4, 128.3, 128.1, 127.6, 126.3, 120.6, 72.0, 39.7, 35.3, 31.1. HRMS (ESI) *m/z*: [M + Na]<sup>+</sup> Calcd for C<sub>34</sub>H<sub>30</sub>IN<sub>5</sub>NaO<sub>3</sub>, 706.1291; Found 706.1280. The enantiomeric ratio was determined by HPLC analysis on a chiral AD-H column. *n*-Hexane/*i*-PrOH = 15:2, flow rate = 0.8 mL/min., λ = 254 nm, *t*<sub>R</sub> = 9.2 min. (major).

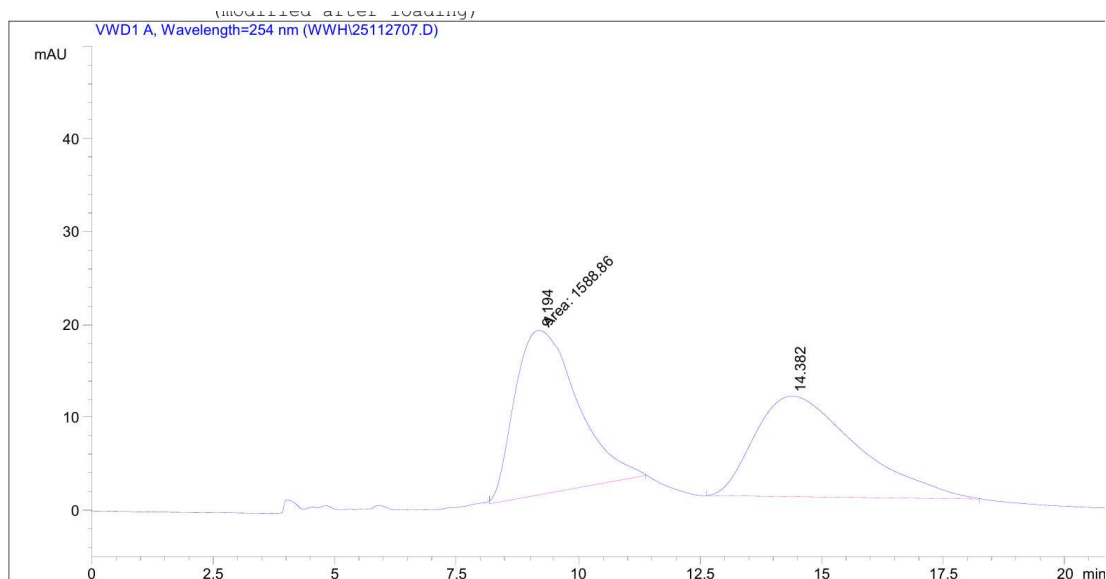

| Peak # | RetTime [min] | Type | Width [min] | Area mAU   | Area *s  | Height [mAU] | Area % |
|--------|---------------|------|-------------|------------|----------|--------------|--------|
| 1      | 9.194         | MM   | 1.4929      | 1588.86279 | 17.73801 | 50.0530      |        |
| 2      | 14.382        | BB   | 1.7164      | 1585.49512 | 10.84133 | 49.9470      |        |

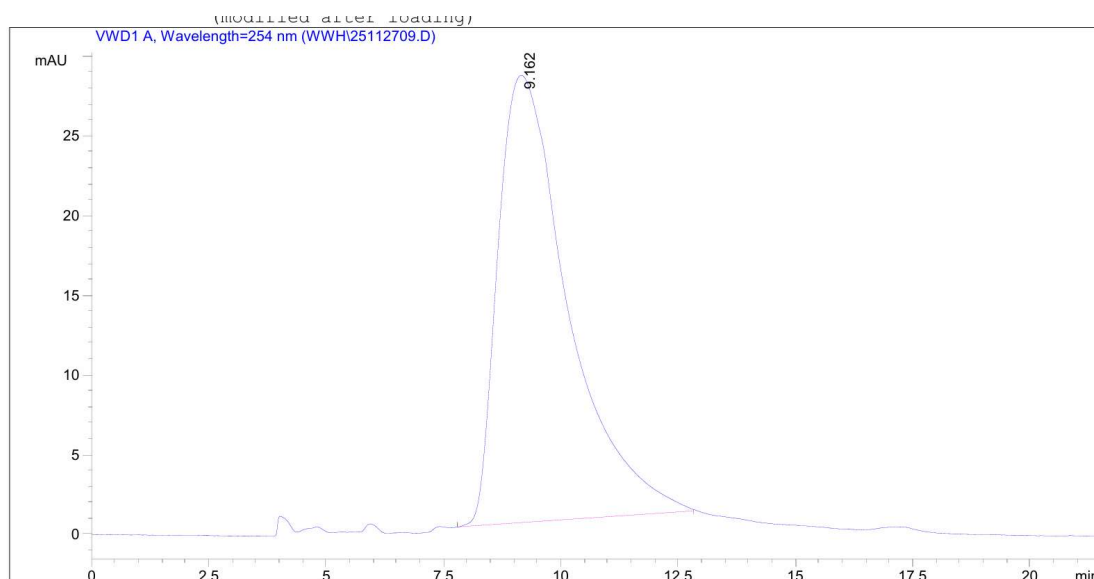

| Peak # | RetTime [min] | Type | Width [min] | Area mAU   | Area *s | Height [mAU] | Area %   |
|--------|---------------|------|-------------|------------|---------|--------------|----------|
| 1      | 9.162         | BB   | 1.4713      | 2917.15356 |         | 28.07757     | 100.0000 |

### Gram scale synthesis of the product 3xa

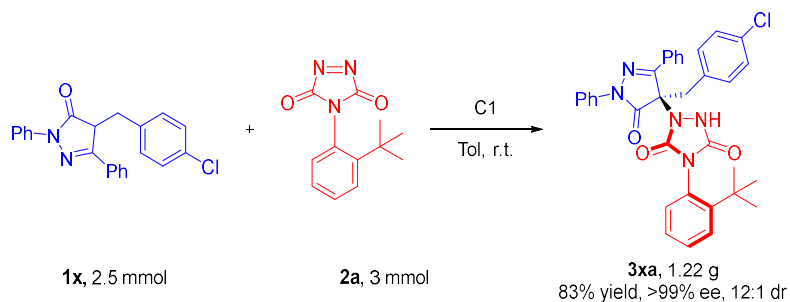

A tube was charged with **1x** (900 mg, 2.5 mmol, 1.0 eq.), **2a** (693 mg, 3 mmol, 1.2 eq.), **C1** (160 mg, 0.25 mmol, 0.1 eq.), followed with Tol (25 mL). The reaction mixture was stirred at 25 °C for 1 h. When compound **1x** was consumed as checked by TLC, the reaction was stopped and purified by column chromatography on silica gel directly to give the product **3xa** as white solid (yield 83%, > 99% ee, dr = 12:1).

### Synthesis of the products 4

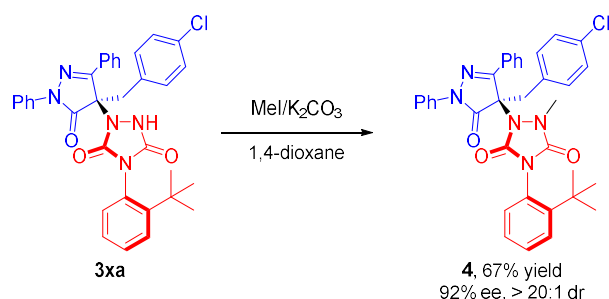

Potassium carbonate (0.4 mmol, 2.0 equiv) was added to a solution of products **3xa** (0.2 mmol, 1.0 equiv) and iodomethane (2.0 mmol, 10 equiv) in dioxane (1 mL) at room temperature. The solution was stirred at room temperature for 5 h. When compound **3xa** was consumed as checked by TLC, the reaction was stopped and purified by column chromatography on silica gel directly to give the product **4** as white solid (yield 67%, ee 92%, dr > 20:1).

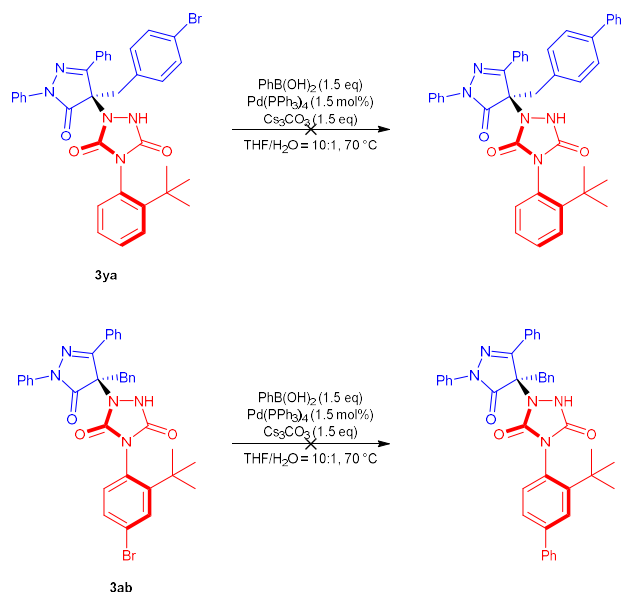

To a solution of **3ya/3ab** (1.0 equiv, 0.1 mmol) in 2.0 mL THF/H<sub>2</sub>O (10:1) was added phenylboronic acid (1.5 equiv, 0.15 mmol), Pd(PPh<sub>3</sub>)<sub>4</sub> (0.15 equiv, 0.015 mmol), Cs<sub>2</sub>CO<sub>3</sub> (1.5 equiv, 0.15 mmol). Then, the reaction system was degassed and filled with nitrogen for three times. The reaction mixture was stirred under N<sub>2</sub> at 70 °C for 14 h. TLC monitoring showed no significant change in the spot corresponding to the starting material. Subsequently, the reaction mixture was purified by silica gel column chromatography, and the isolated product was analyzed by <sup>1</sup>H NMR spectroscopy, which confirmed its identity to be consistent with that of the starting material.

### 3ya

isolated product

<sup>1</sup>H NMR (400 MHz, CDCl<sub>3</sub>) δ 9.16 (s, 1H), 8.08 (d, *J* = 7.5 Hz, 2H), 7.61 - 7.47 (m, 6H), 7.41 - 7.34 (m, 3H), 7.28 (d, *J* = 5.6 Hz, 1H), 7.23 (dd, *J* = 7.9, 3.9 Hz, 3H), 7.05 (d, *J* = 7.8 Hz, 1H), 6.81 (d, *J* = 8.0 Hz, 2H), 3.88 (d, *J* = 12.7 Hz, 1H), 3.80 (d, *J* = 12.6 Hz, 1H), 1.16 (s, 9H).

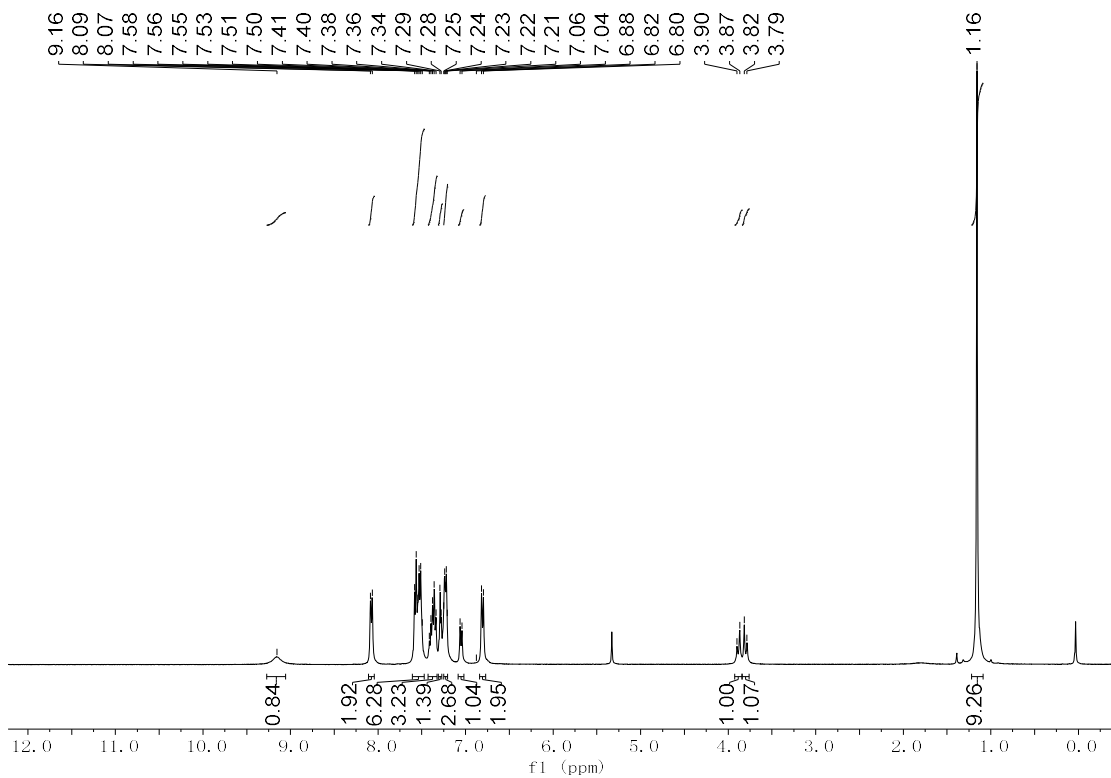

**3ab**

isolated product

$^1\text{H NMR}$  (500 MHz,  $\text{CDCl}_3$ )  $\delta$  8.59 (s, 1H), 8.05 (d,  $J = 7.1$  Hz, 2H), 7.62 (d,  $J = 2.2$  Hz, 1H), 7.55 - 7.46 (m, 5H), 7.35 (dd,  $J = 8.3, 2.3$  Hz, 1H), 7.31 - 7.28 (m, 2H), 7.20 - 7.12 (m, 2H), 7.10 - 7.07 (m, 2H), 6.95 (d,  $J = 7.2$  Hz, 2H), 6.84 (d,  $J = 8.3$  Hz, 1H), 3.96 (d,  $J = 12.6$  Hz, 1H), 3.87 (d,  $J = 12.5$  Hz, 1H), 1.14 (s, 9H).

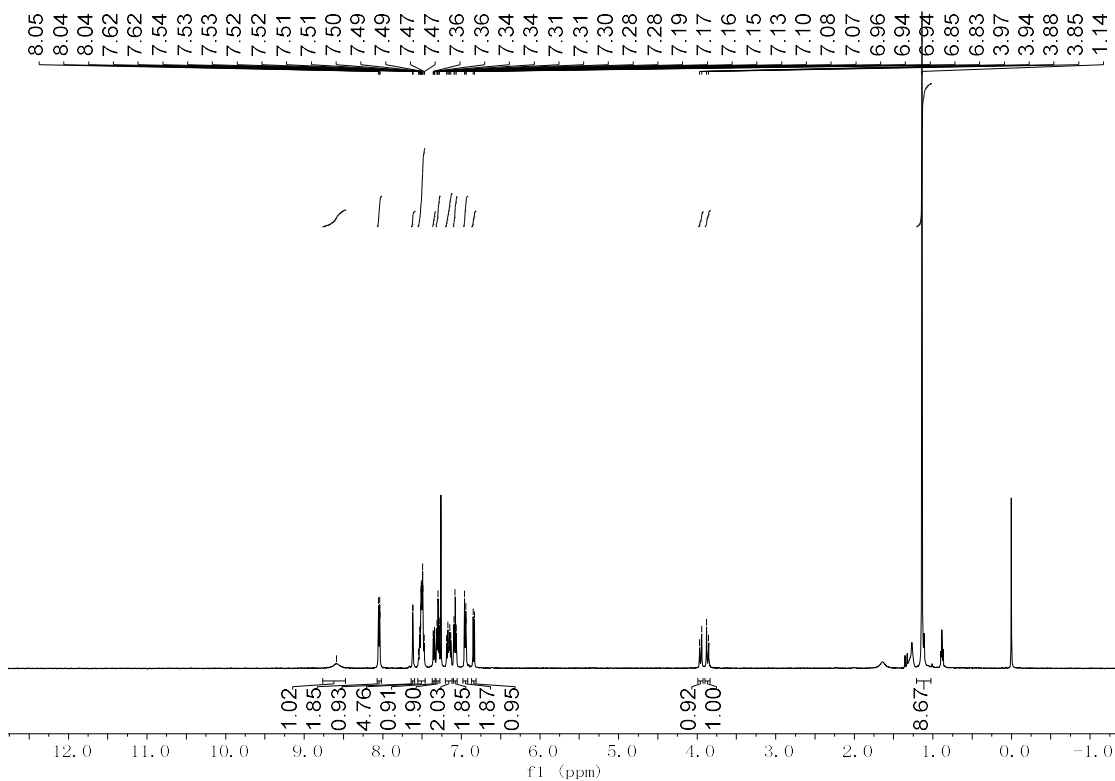

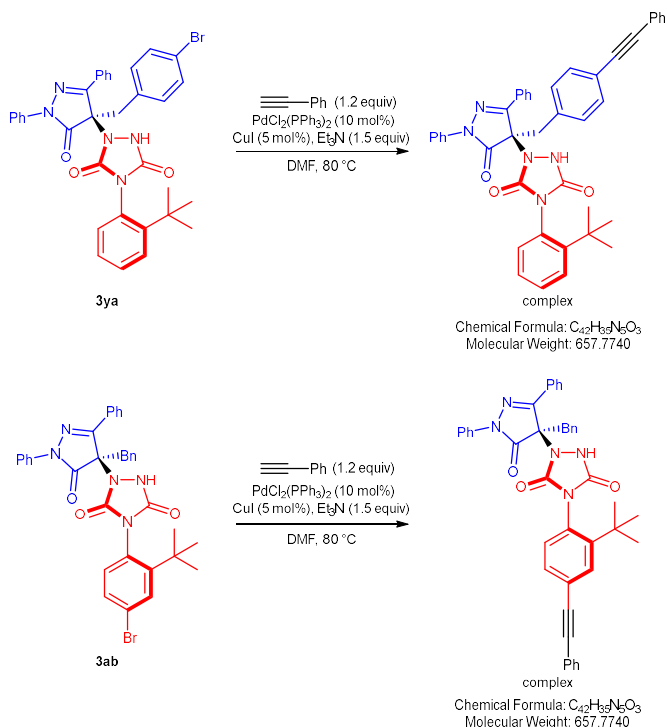

To a solution of **3ya/3ab** (1.0 equiv, 0.1 mmol), Et<sub>3</sub>N (0.07 mL) in 1.0 mL DMF was added ethynylbenzene (2.5 equiv, 0.25 mmol), CuI (5.0 mol%), PdCl<sub>2</sub>(PPh<sub>3</sub>)<sub>2</sub> (10 mol%). Then, the reaction system was degassed and filled with nitrogen for three times. The reaction mixture was stirred under N<sub>2</sub> at 80 °C for 17 h. TLC analysis revealed a complex reaction mixture with multiple product spots. Subsequent HRMS analysis of the crude reaction mixture indicated the absence of the desired compound.

### 3ya

reaction system

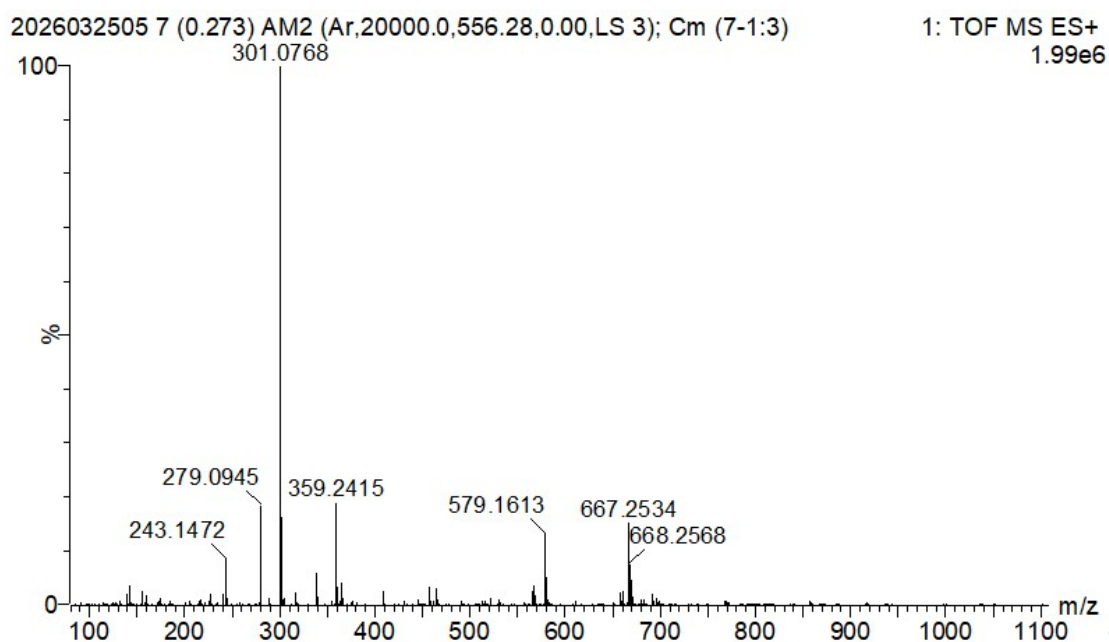

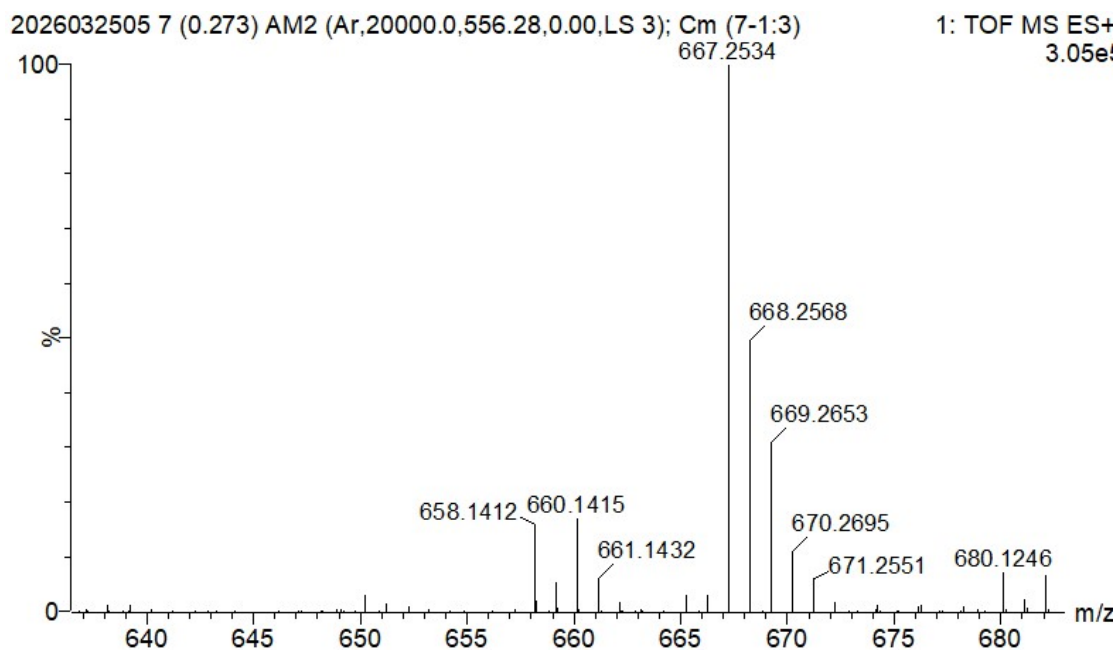

**3ab**

reaction system

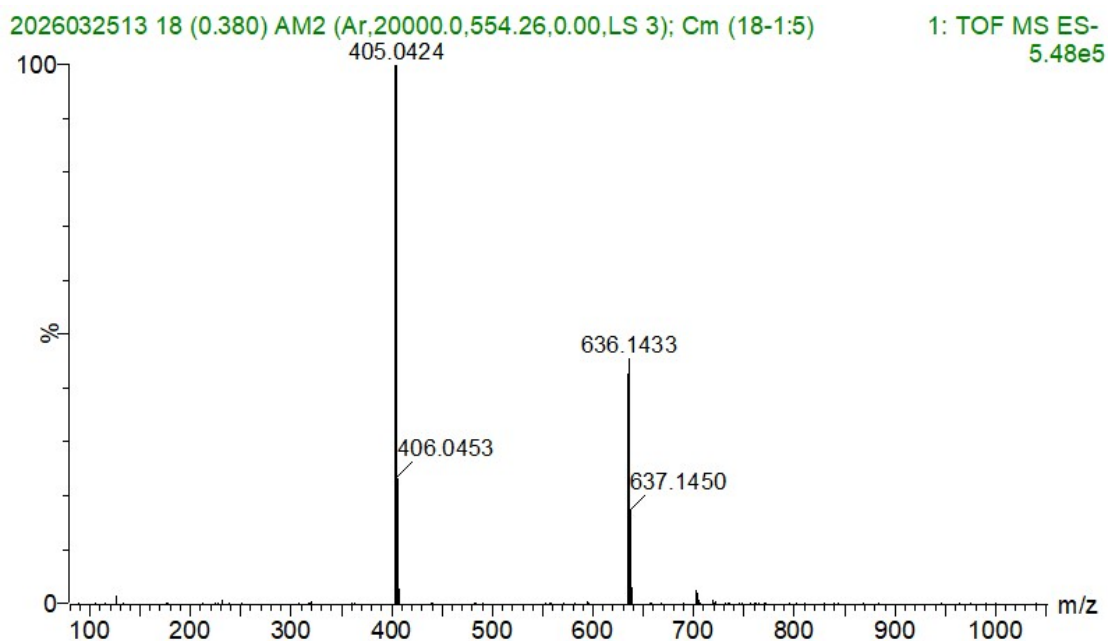

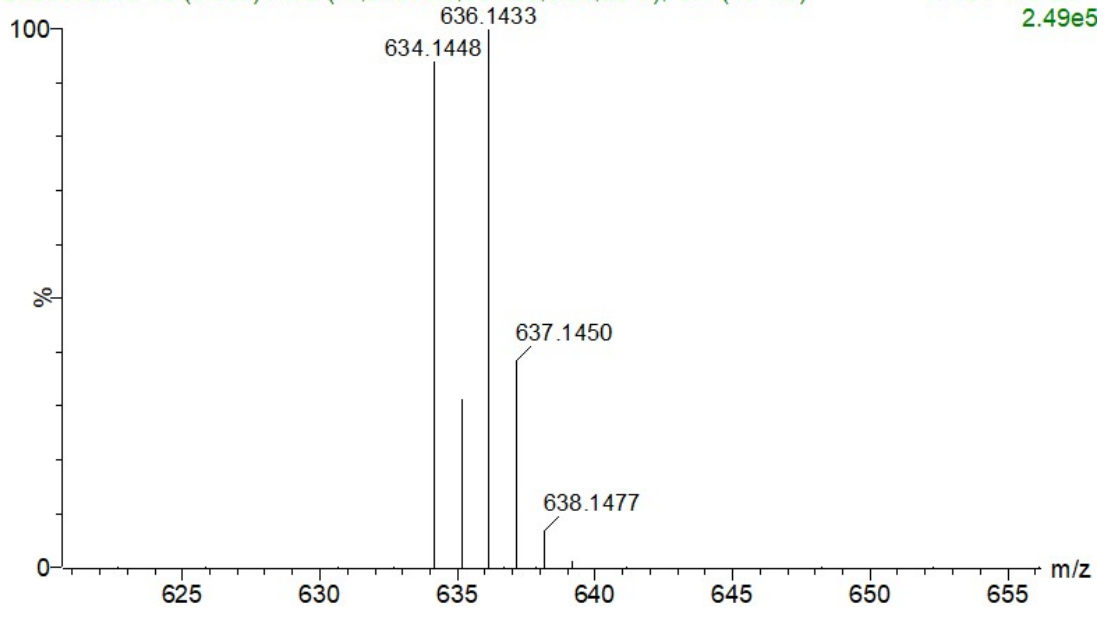

**4-(2-(tert-butyl)phenyl)-1-(4-(4-chlorobenzyl)-5-oxo-1,3-diphenyl-4,5-dihydro-1H-pyrazol-4-yl)-2-methyl-1,2,4-triazolidine-3,5-dione (4):**

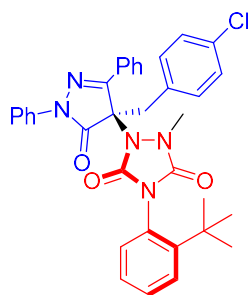

**4**

White solid, mp 135-137 °C, 67% yield, 92% ee, dr > 20:1.  $[\alpha]_D^{25} = +20.972$  (c = 0.2, CH<sub>2</sub>Cl<sub>2</sub>). <sup>1</sup>H NMR (400 MHz, CDCl<sub>3</sub>) δ 8.18 - 8.09 (m, 2H), 7.67 - 7.52 (m, 6H), 7.51 - 7.41 (m, 1H), 7.40 - 7.36 (m, 2H), 7.32 - 7.28 (m, 1H), 7.25 - 7.21 (m, 1H), 7.02 (d, *J* = 8.0 Hz, 2H), 6.99 - 6.92 (m, 1H), 6.81 (d, *J* = 8.0 Hz, 2H), 4.05 (s, 2H), 3.21 (s, 3H), 1.38 (s, 9H). <sup>13</sup>C NMR (101 MHz, CDCl<sub>3</sub>) δ 169.8, 155.3, 149.5, 136.7, 134.1, 131.5, 131.4, 131.2, 130.4, 129.9, 129.5, 129.1, 129.0, 128.7, 128.4, 127.6, 126.6, 126.3, 119.7, 75.0, 39.3, 35.6, 31.4, 29.7. HRMS (ESI) *m/z*: [M + Na]<sup>+</sup> Calcd for C<sub>35</sub>H<sub>32</sub>ClN<sub>5</sub>NaO<sub>3</sub>, 628.2091;

Found 628.2088. The enantiomeric ratio was determined by HPLC analysis on a chiral AD-H column. *n*-Hexane/*i*-PrOH = 3:2, flow rate = 0.8 mL/min., λ = 254 nm, *t<sub>R</sub>* = 14.5 min. (minor), 42.7 min. (major).

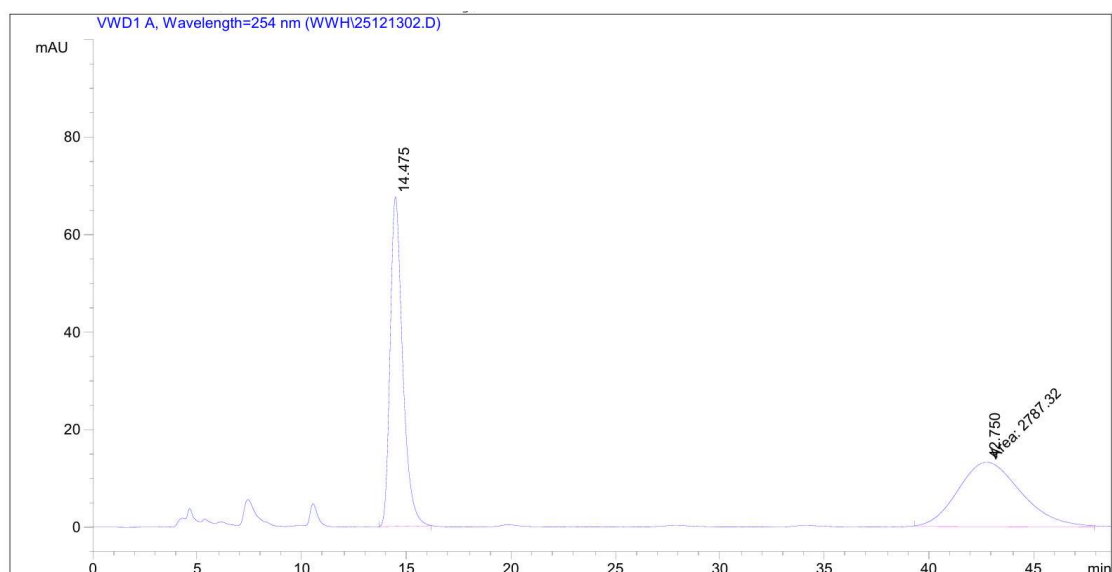

| Peak # | RetTime [min] | Type | Width [min] | Area mAU *s | Height [mAU] | Area %  |
|--------|---------------|------|-------------|-------------|--------------|---------|
| 1      | 14.475        | BB   | 0.6216      | 2807.32178  | 67.56274     | 50.1787 |
| 2      | 42.750        | MM   | 3.5130      | 2787.32422  | 13.22387     | 49.8213 |

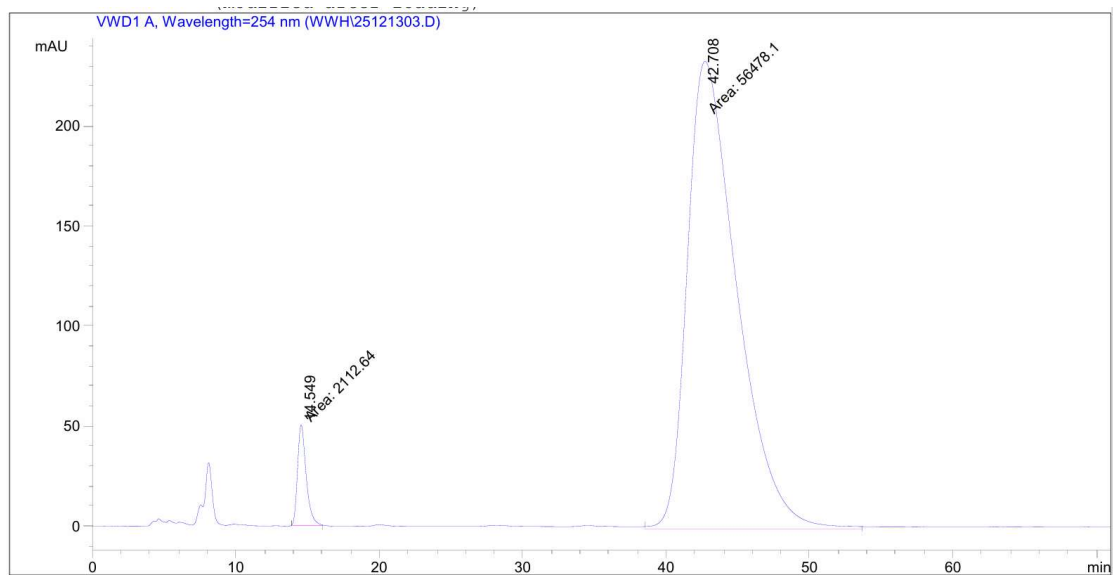

| Peak # | RetTime [min] | Type | Width [min] | Area mAU *s | Height [mAU] | Area %  |
|--------|---------------|------|-------------|-------------|--------------|---------|
| 1      | 14.549        | MM   | 0.6993      | 2112.63550  | 50.35394     | 3.6057  |
| 2      | 42.708        | MM   | 4.0230      | 5.64781e4   | 233.97910    | 96.3943 |

#### 4. The racemization experiment<sup>3</sup>

The enantiomerisation barrier was obtained by kinetic of racemization of an enantiomer<sup>3c</sup>. The slope of the first order kinetic line gives the racemization ( $k_{ent} = \frac{1}{2} k_{rac}$ ). Eyring equation gives the enantiomerisation barrier ( $\Delta G_T^\ddagger$ ) from enantiomerisation constant ( $k_{ent}$ ),  $R = 8.31451 \text{ J}\cdot\text{K}^{-1}\cdot\text{mol}^{-1}$ ,  $h = 6.62608 \times 10^{-34} \text{ J}\cdot\text{s}$ ,  $k_B = 1.38066 \times 10^{-23} \text{ J}\cdot\text{K}^{-1}$ . Enantiomeric excess values were determined by HPLC.

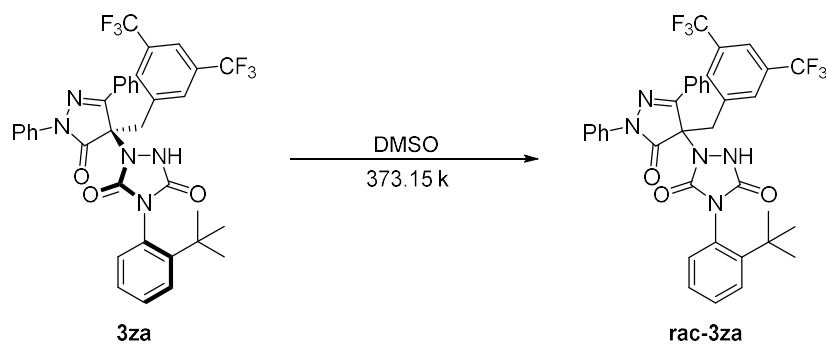

**Table S1.** Racemization of **3za** in mesitylene at 100 °C.

| t/h | dr | de          | t (s) | $\ln(\text{de}_0/\text{de}_t)$ |
|-----|----|-------------|-------|--------------------------------|
| 0   |    | 1           | 0     | 0                              |
| 1   | 39 | 0.95        | 3600  | 0.051293294                    |
| 1.5 | 36 | 0.945945946 | 5400  | 0.055569851                    |
| 2   | 29 | 0.933333333 | 7200  | 0.068992871                    |
| 2.5 | 19 | 0.9         | 9000  | 0.105360516                    |
| 3   | 14 | 0.866666667 | 10800 | 0.143100844                    |
| 3.5 | 11 | 0.833333333 | 12600 | 0.182321557                    |
| 4.5 | 9  | 0.8         | 16200 | 0.223143551                    |
| 5.5 | 8  | 0.777777778 | 19800 | 0.251314428                    |

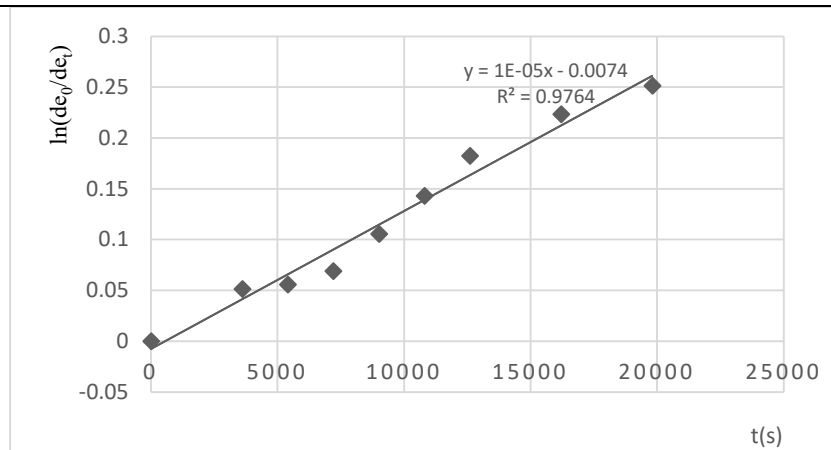

Figure S1. The plot of  $\ln[(\text{de}_0/\text{de}_t)]$  vs time of **3za** at 100 °C

$T = 100 \text{ }^\circ\text{C}$  (DMSO);  $k_{ent} = \frac{1}{2} k_{rac} = \frac{1}{2} \text{slope} = 5 \times 10^{-6}$ ;  $t_{1/2} = \ln 2/k_{rac} = 19 \text{ h}$ ;

$\Delta G_T^\ddagger = \ln\left(\frac{k_B T}{h \times k_{ent}}\right) RT = 129.96 \text{ kJ}\cdot\text{mol}^{-1} = 31.1 \text{ kcal}\cdot\text{mol}^{-1}$

## 5. References

1. J. Geng, X. Wei, B. He, Y. Hao, J. Qu and B. Wang, *Molecules*, 2023, **28**, 4279.
2. L. L. Zhang, J. W. Zhang, S. H. Xiang, Z. Guo and B. Tan, *Org Lett*, 2018, **20**, 6022-6026.
3. (a) S. Barik, S. S. Ranganathappa and A. T. Biju, *Nat. Commun.*, 2024, **15**, 5755; (b) S. Barik, S. Shee, S. Das, R. G. Gonnade, G. Jindal, S. Mukherjee and A. T. Biju, *Angew. Chem. Int. Ed.*, 2021, **60**, 12264-12268; (c) A. Luc and J. Wencel-Delord, *Chem. Commun.*, 2023, **59**, 8159-8167; (d) G.-J. Mei, J. J. Wong, W. Zheng, A. A. Nangia, K. N. Houk and Y. Lu, *Chem*, 2021, **7**, 2743-2757; (e) H.-Q. Wang, S.-F. Wu, J.-R. Yang, Y.-C. Zhang and F. Shi, *J. Org. Chem.*, 2022, **88**, 7684-7702.



### <sup>1</sup>H NMR spectra of **3ba**

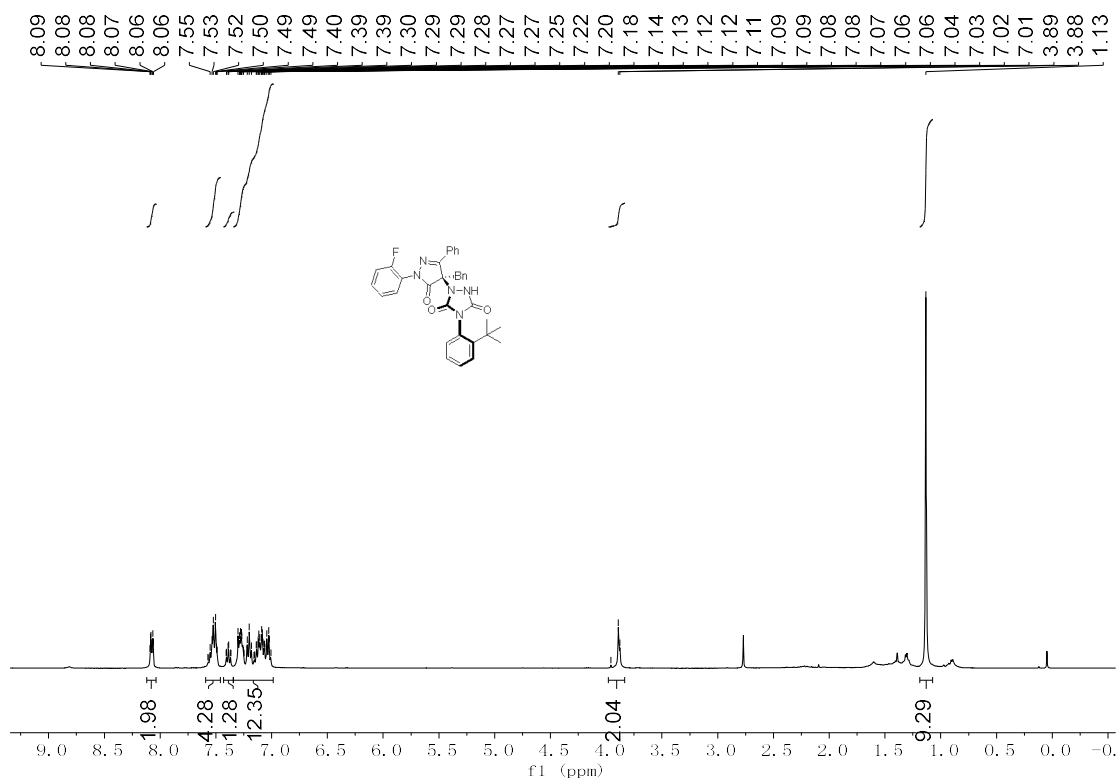

### <sup>13</sup>C NMR spectra of **3ba**

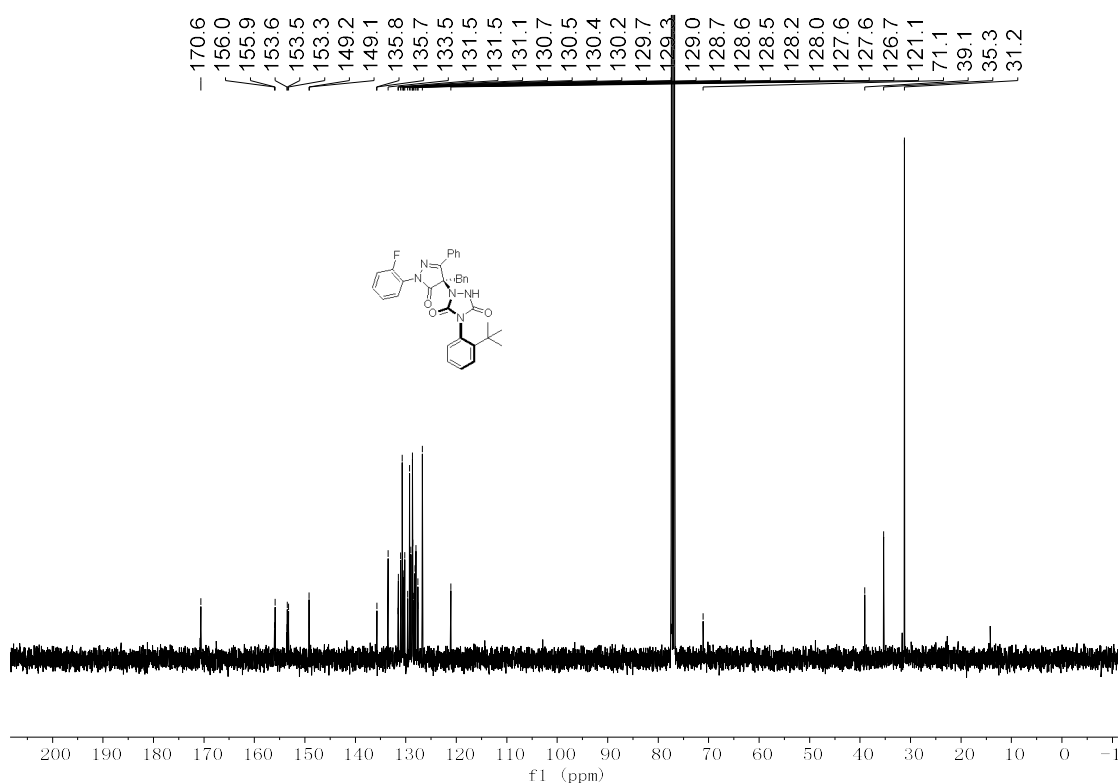

### <sup>19</sup>F NMR spectra of **3ba**

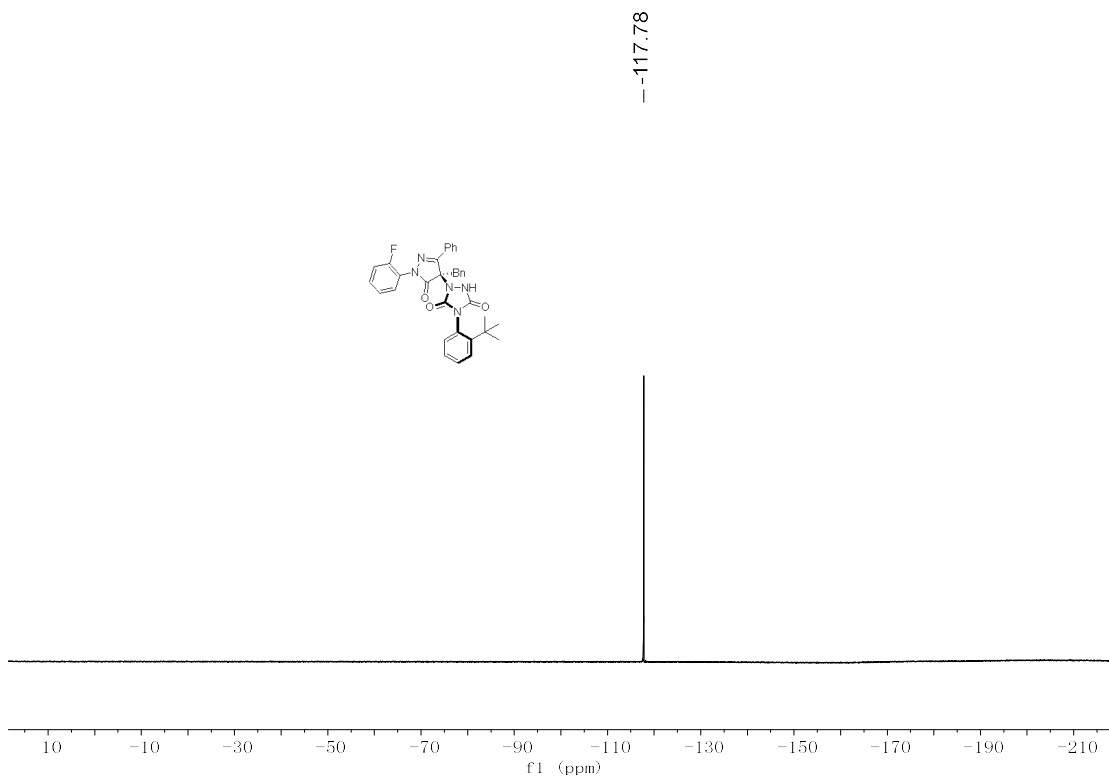



### <sup>1</sup>H NMR spectra of **3da**

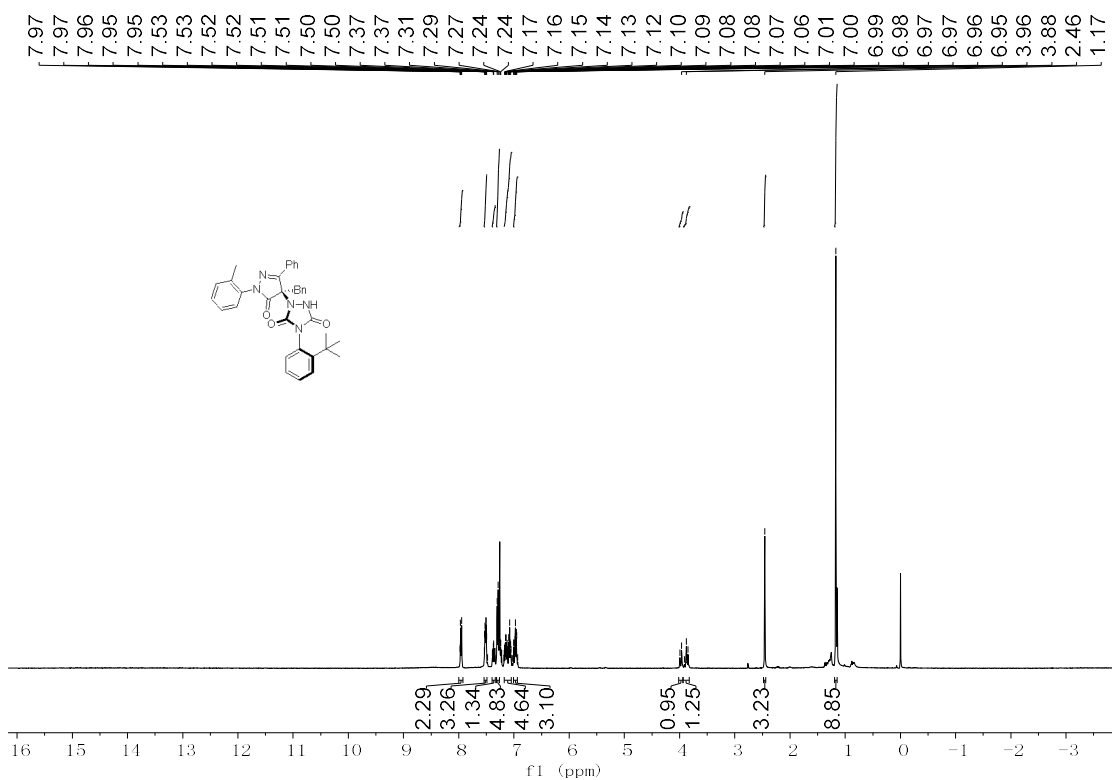

### <sup>13</sup>C NMR spectra of **3da**

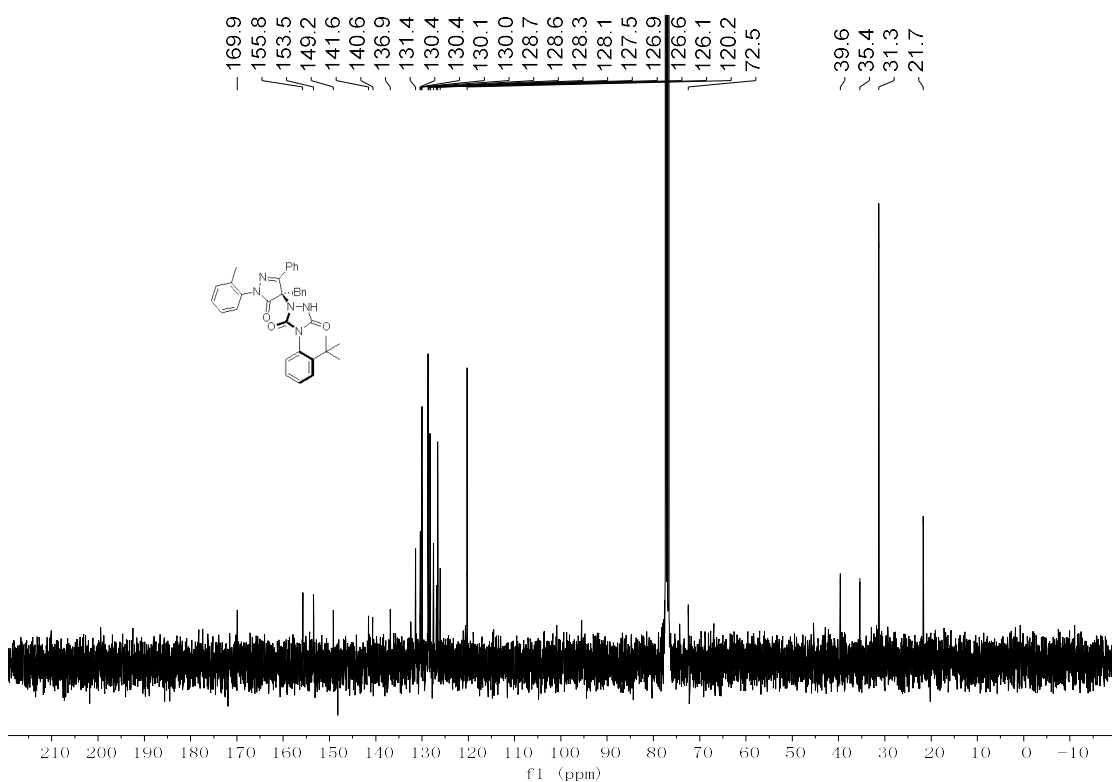

### <sup>1</sup>H NMR spectra of **3ea**

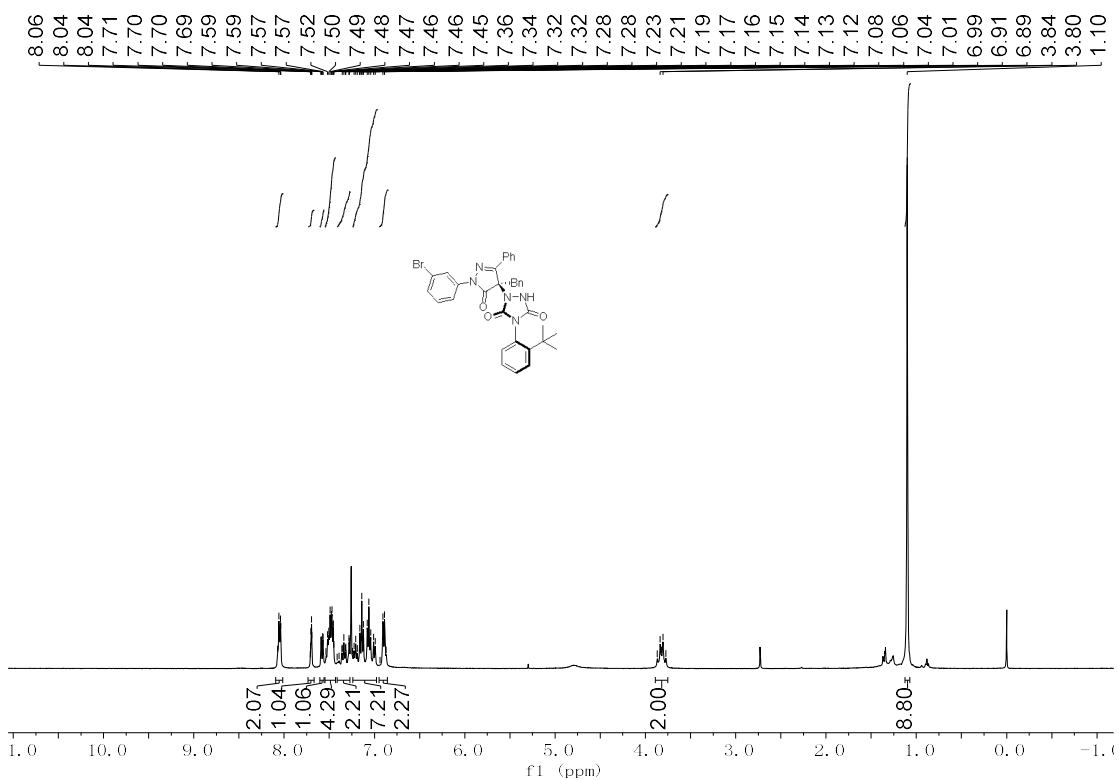

### <sup>13</sup>C NMR spectra of **3ea**

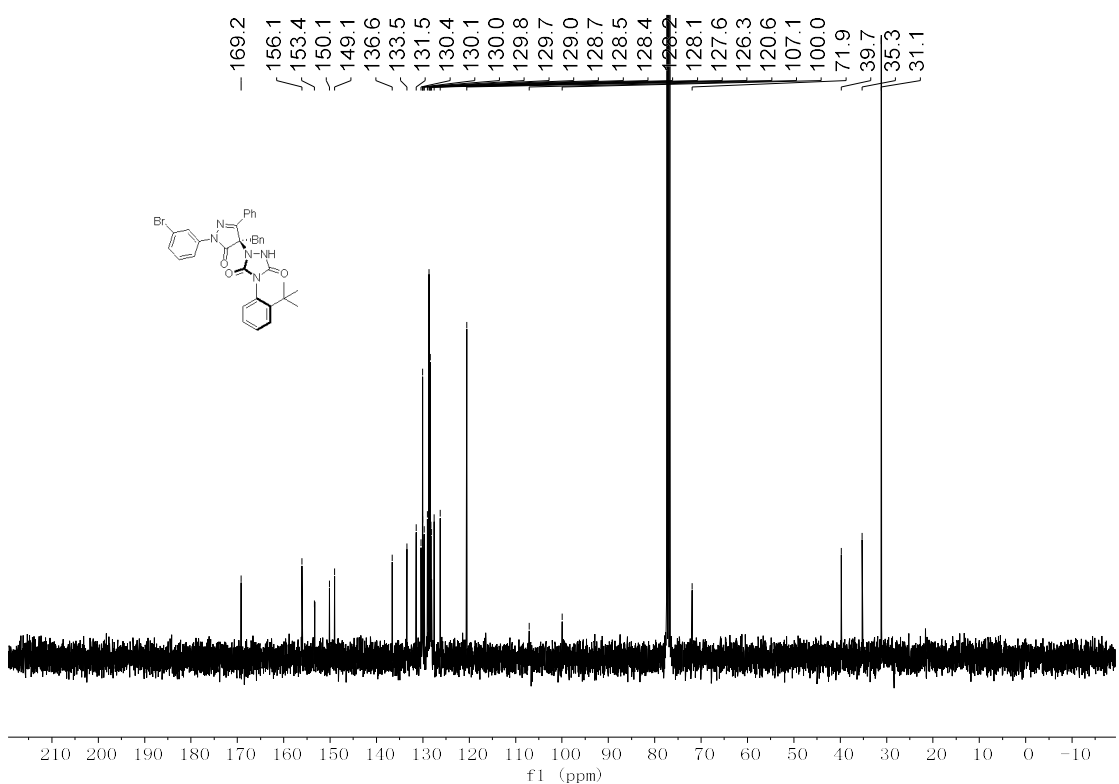

<sup>1</sup>H NMR spectra of **3fa**

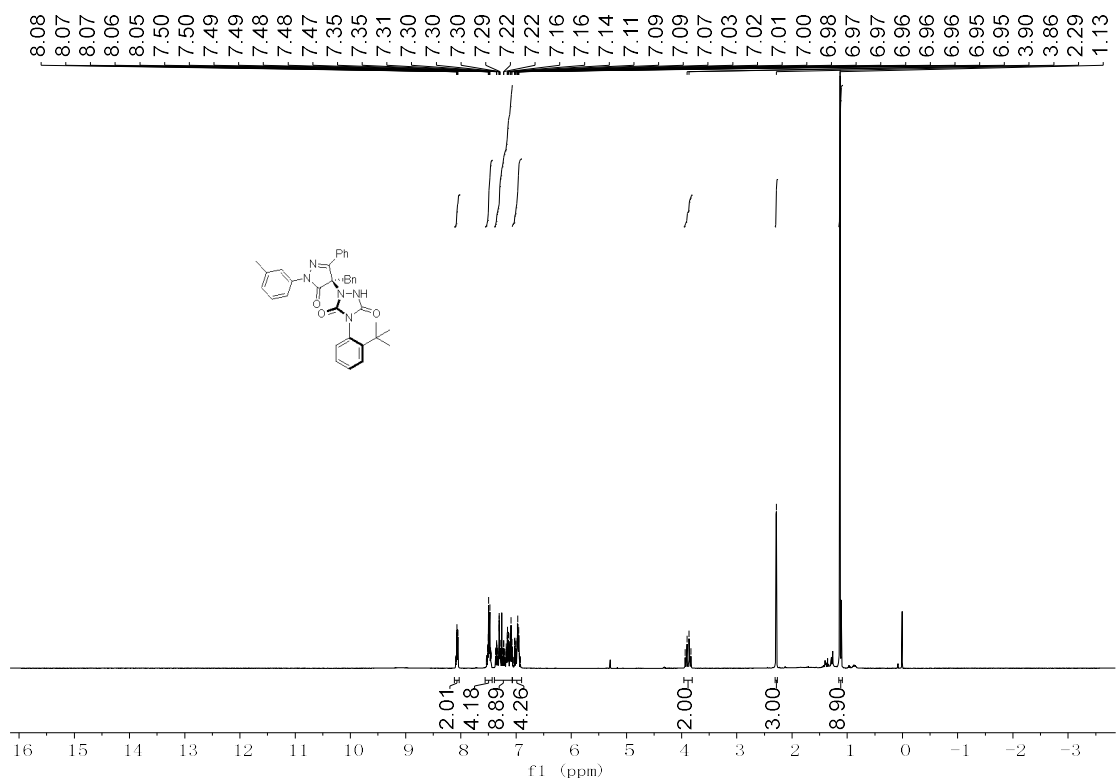

<sup>13</sup>C NMR spectra of **3fa**

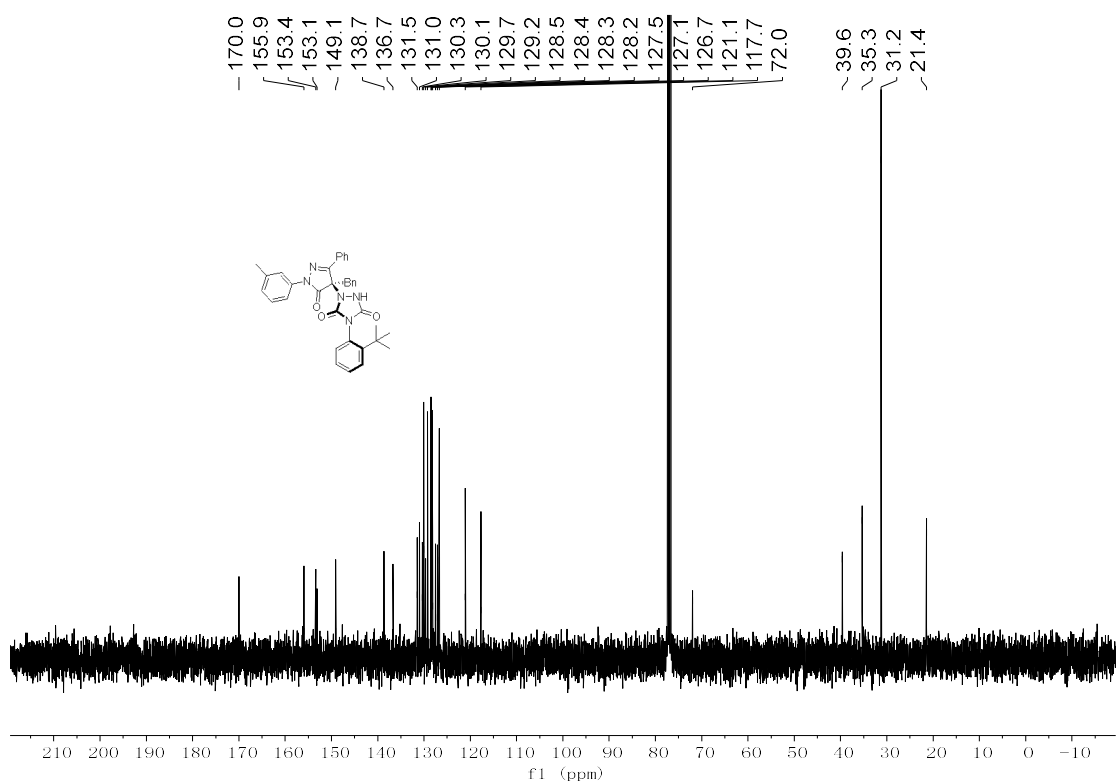

### <sup>1</sup>H NMR spectra of **3ga**

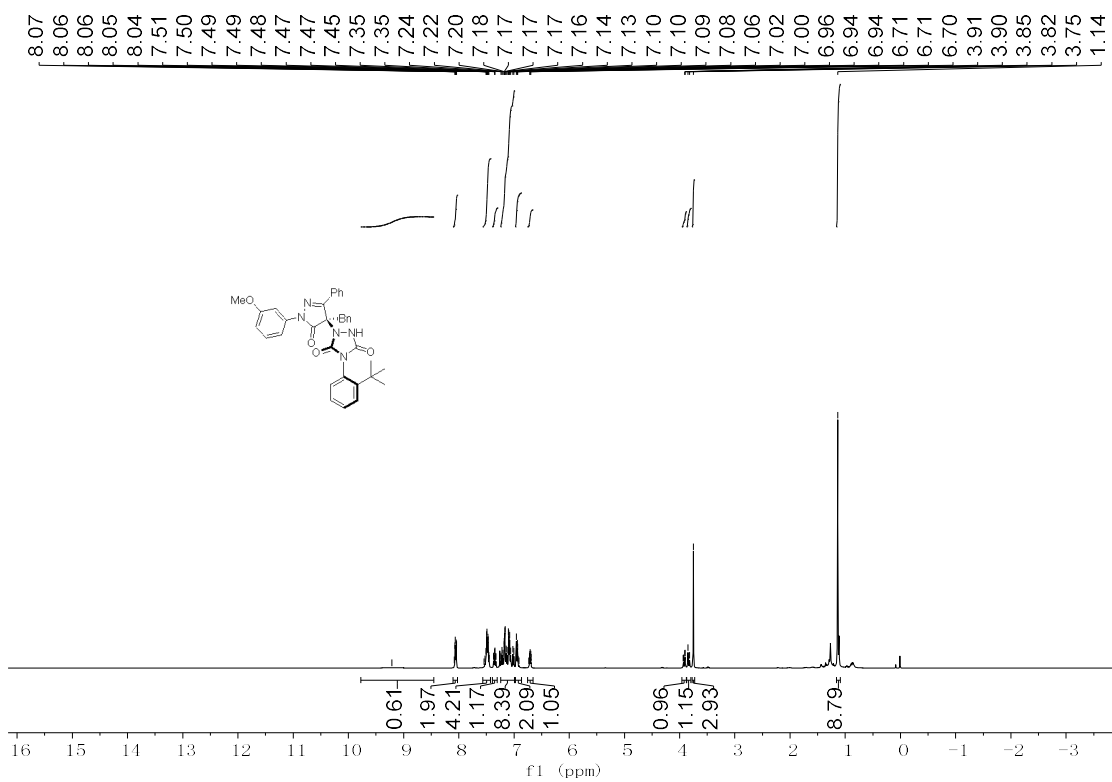

### <sup>13</sup>C NMR spectra of **3ga**

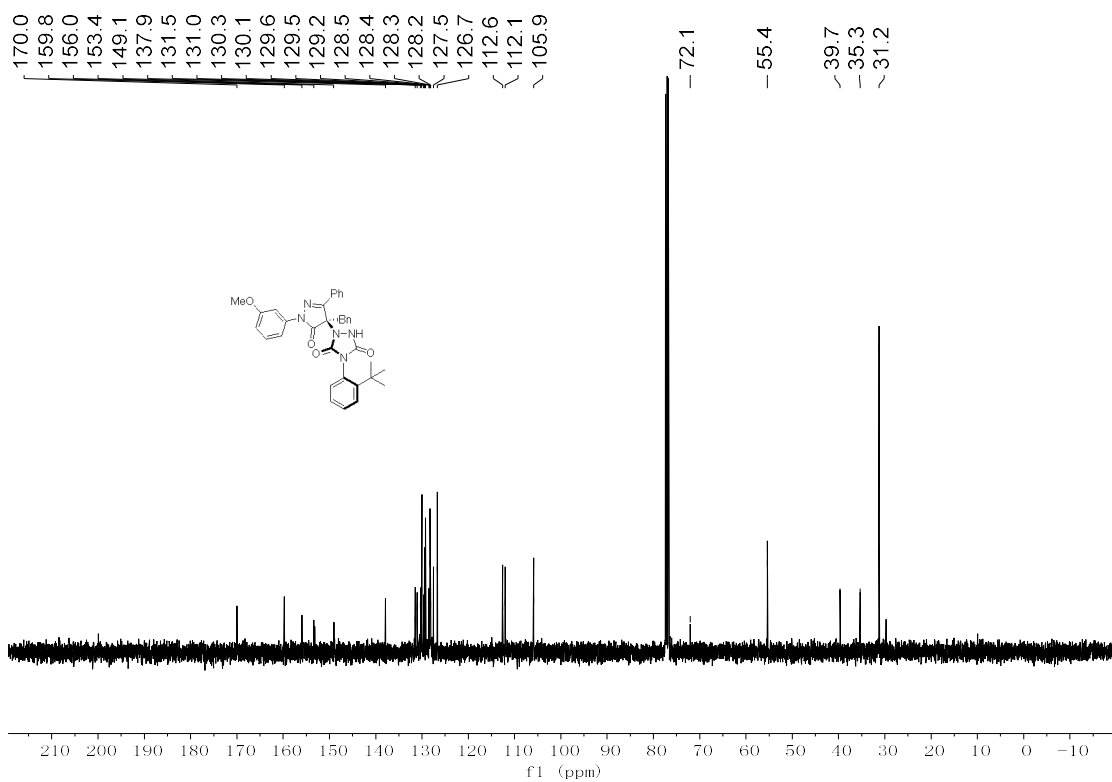

<sup>1</sup>H NMR spectra of **3ha**

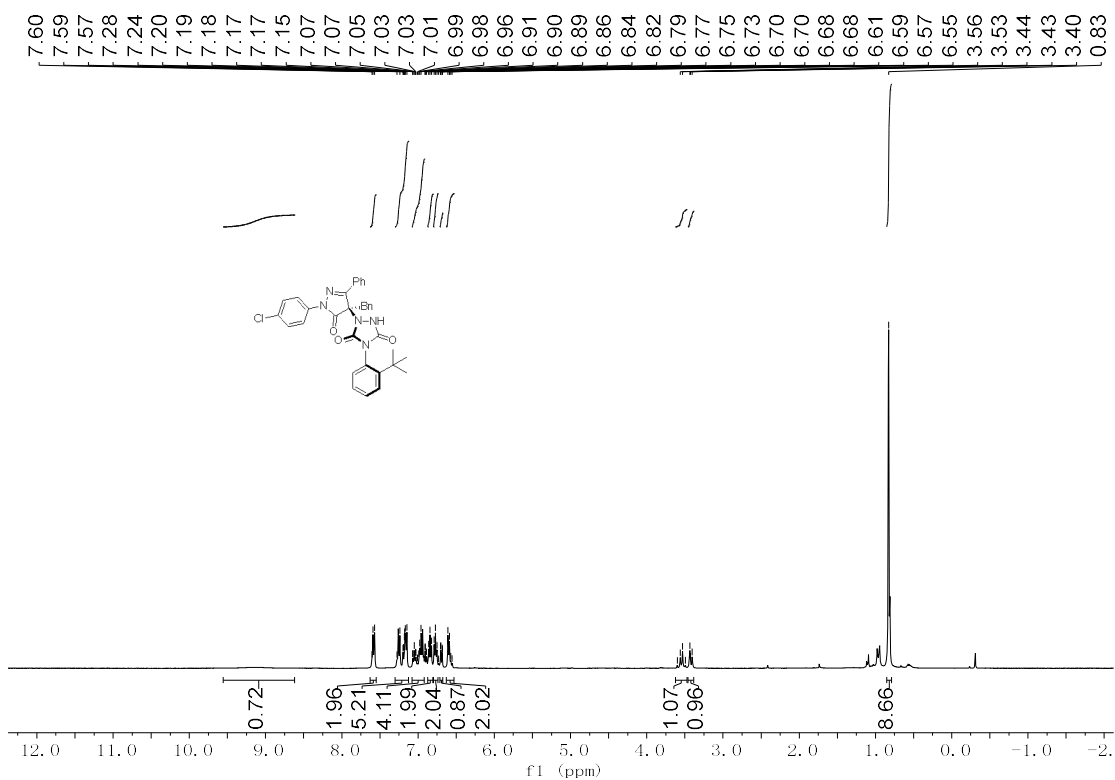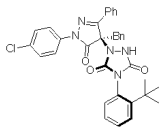

<sup>13</sup>C NMR spectra of **3ha**

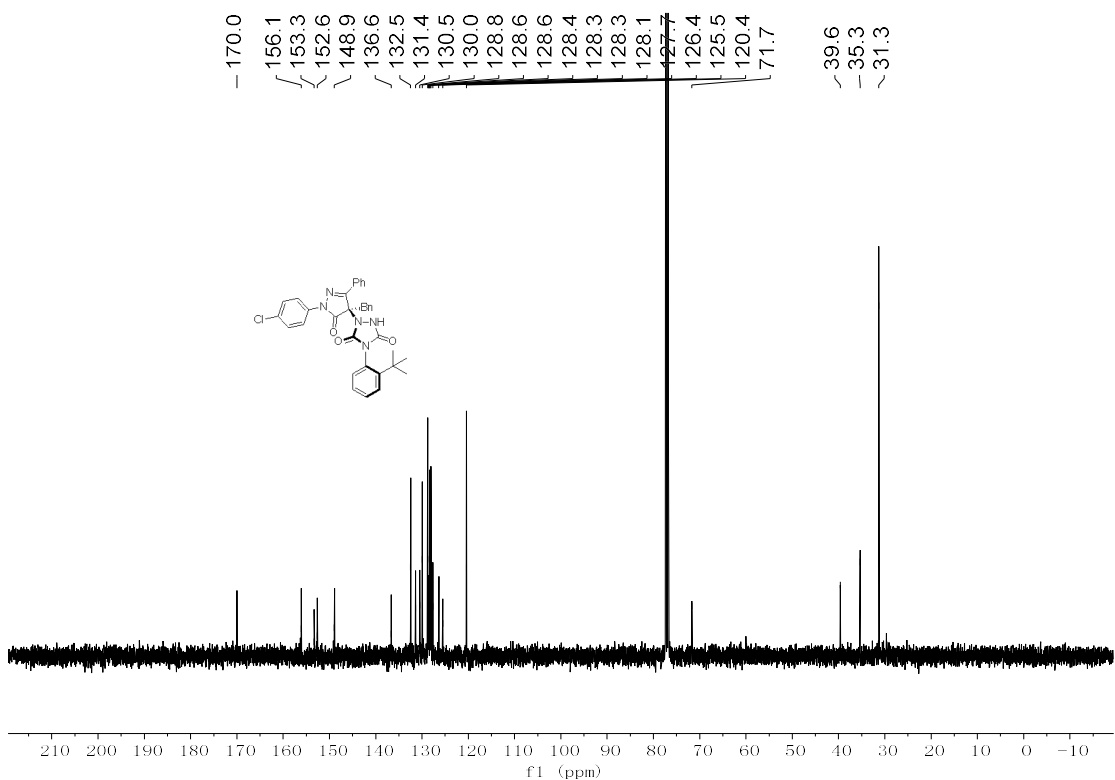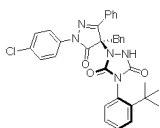

<sup>1</sup>H NMR spectra of **3ia**

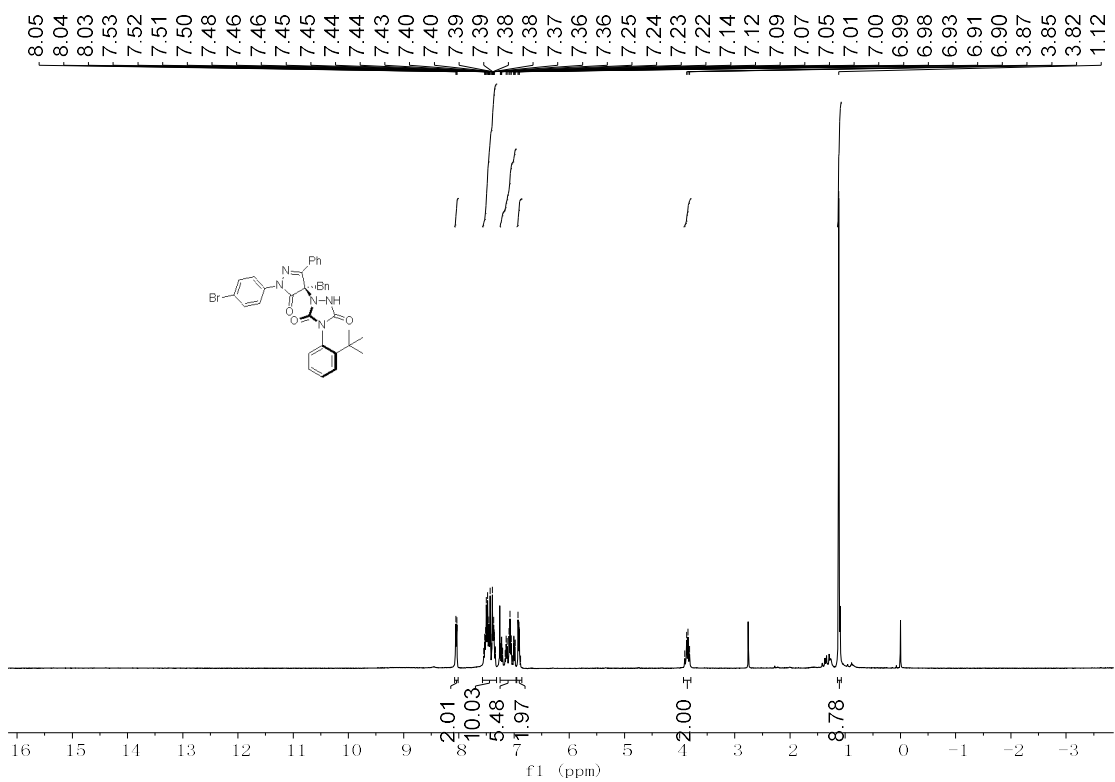

<sup>13</sup>C NMR spectra of **3ia**

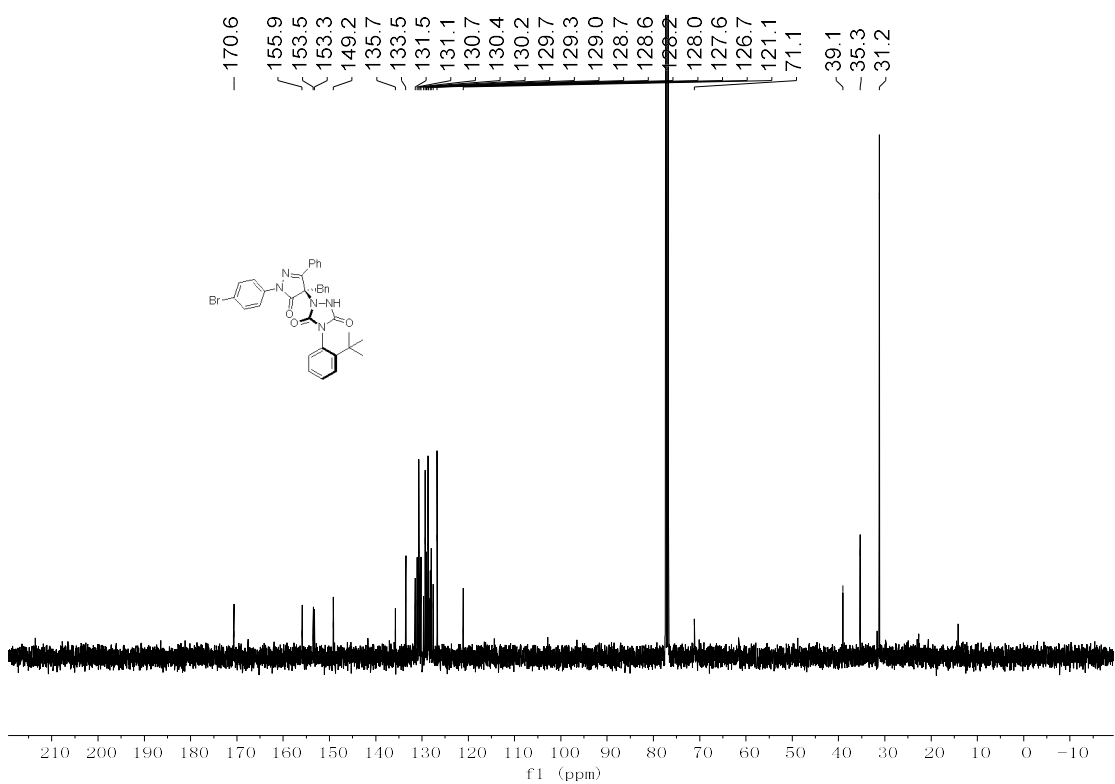

### <sup>1</sup>H NMR spectra of **3ja**

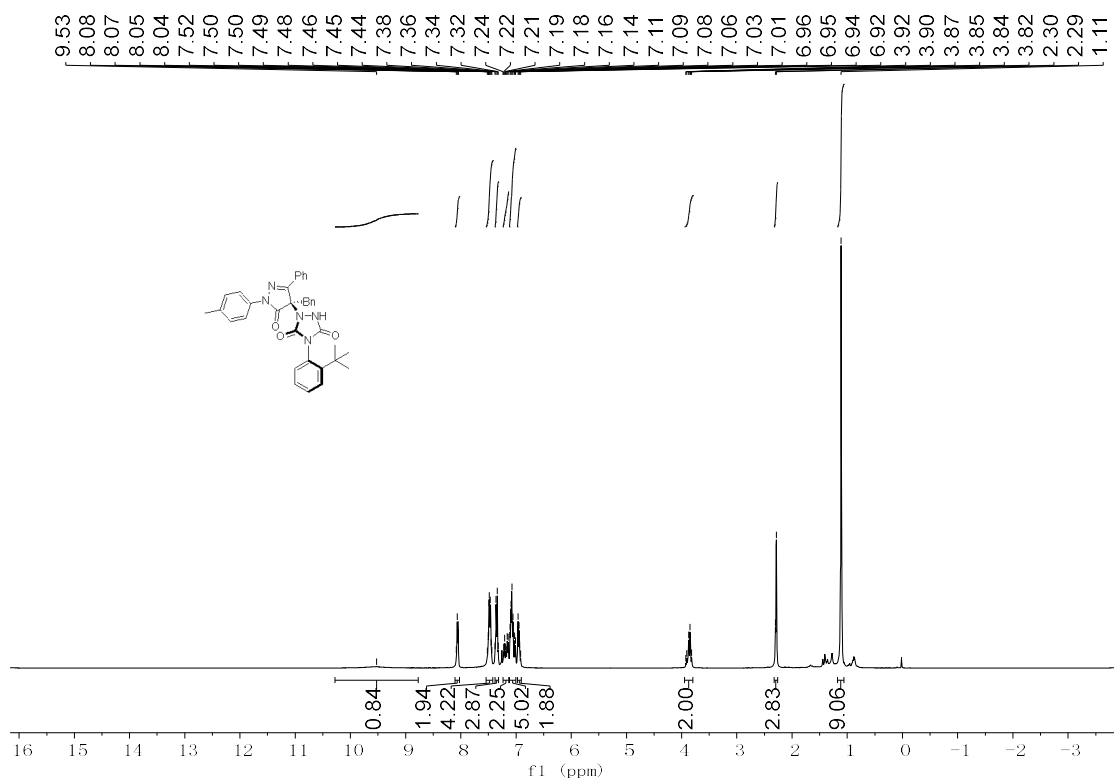

### <sup>13</sup>C NMR spectra of **3ja**

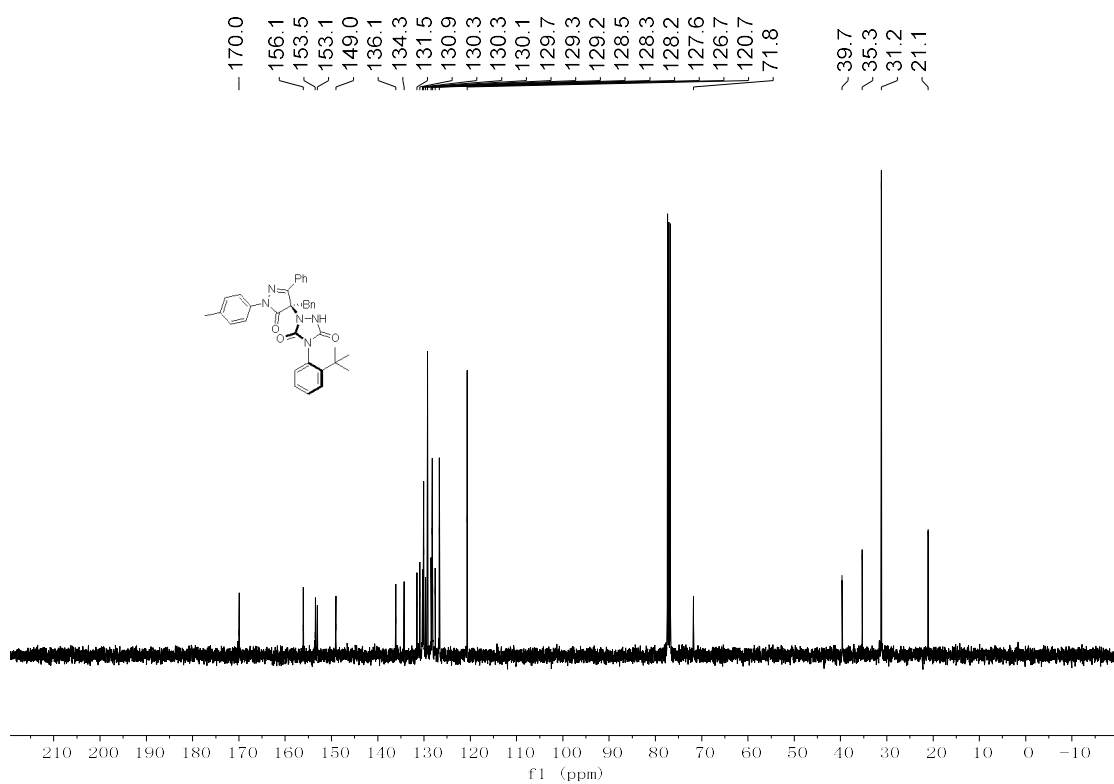

### <sup>1</sup>H NMR spectra of **3ka**

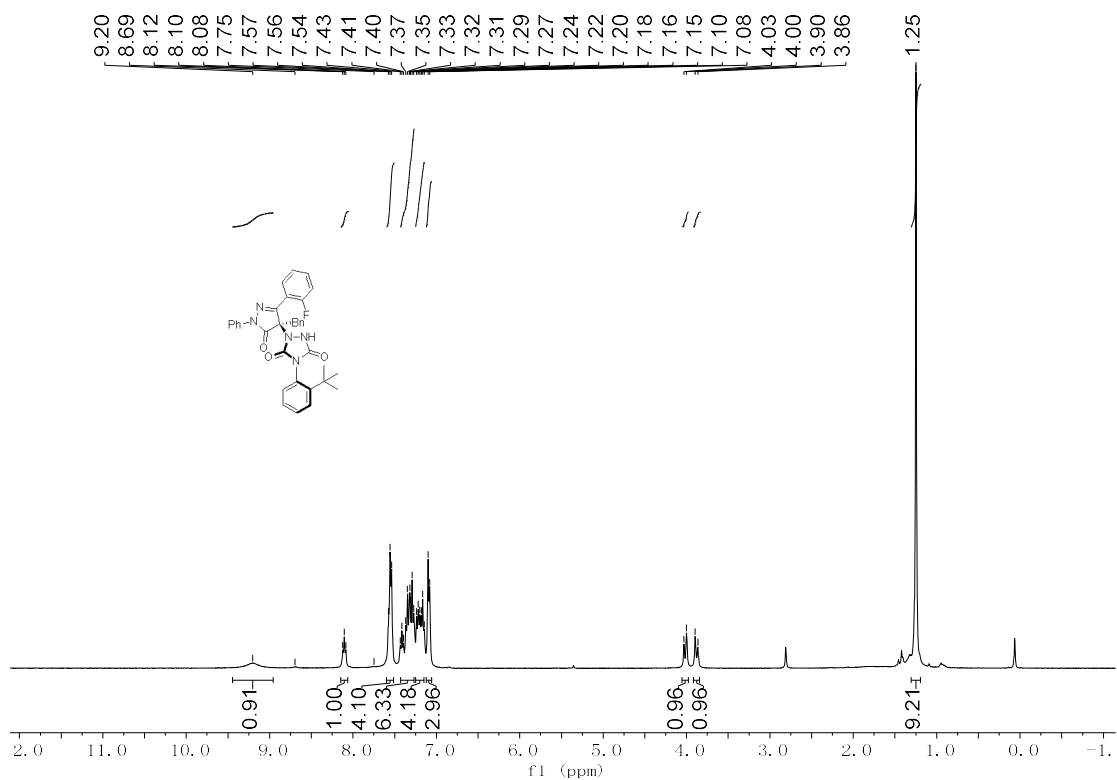

### <sup>13</sup>C NMR spectra of **3ka**

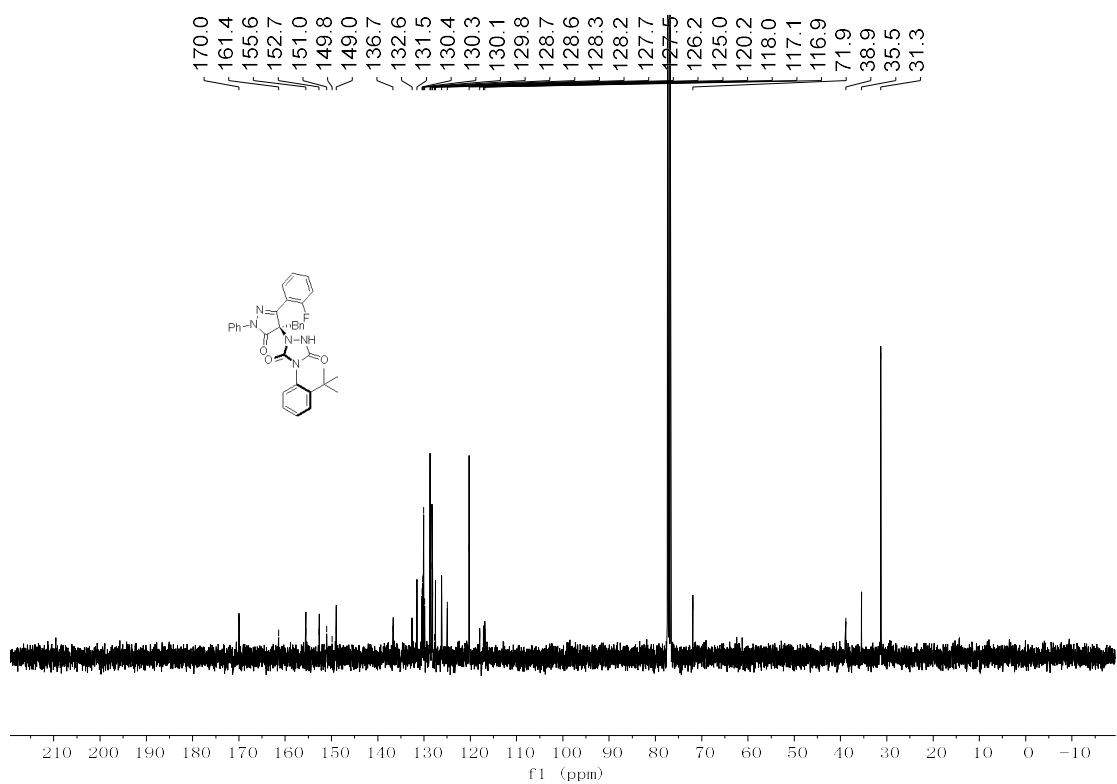

### <sup>19</sup>F NMR spectra of **3ka**

--107.47

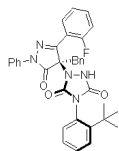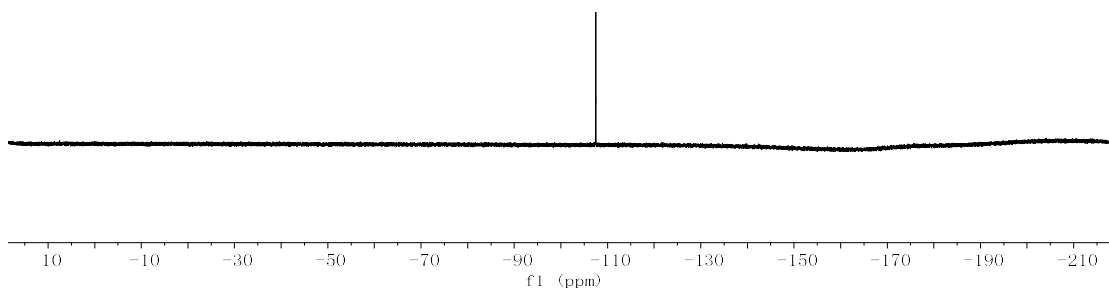

### <sup>1</sup>H NMR spectra of **3la**

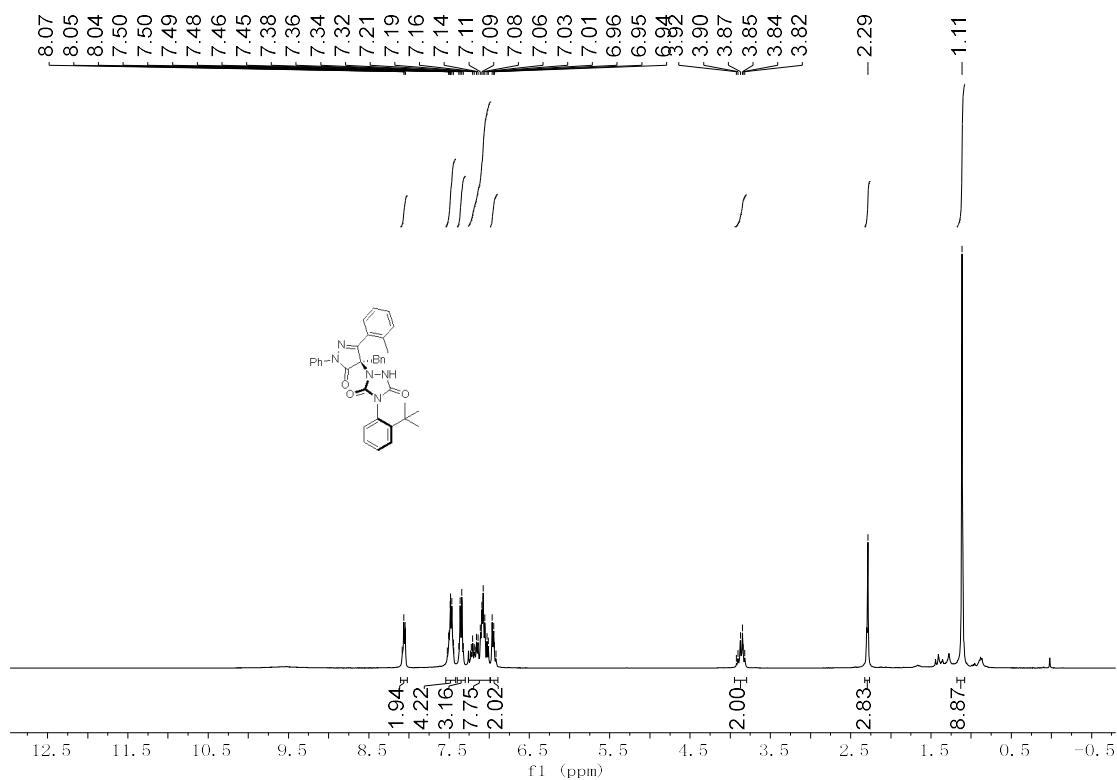

### <sup>13</sup>C NMR spectra of **3la**

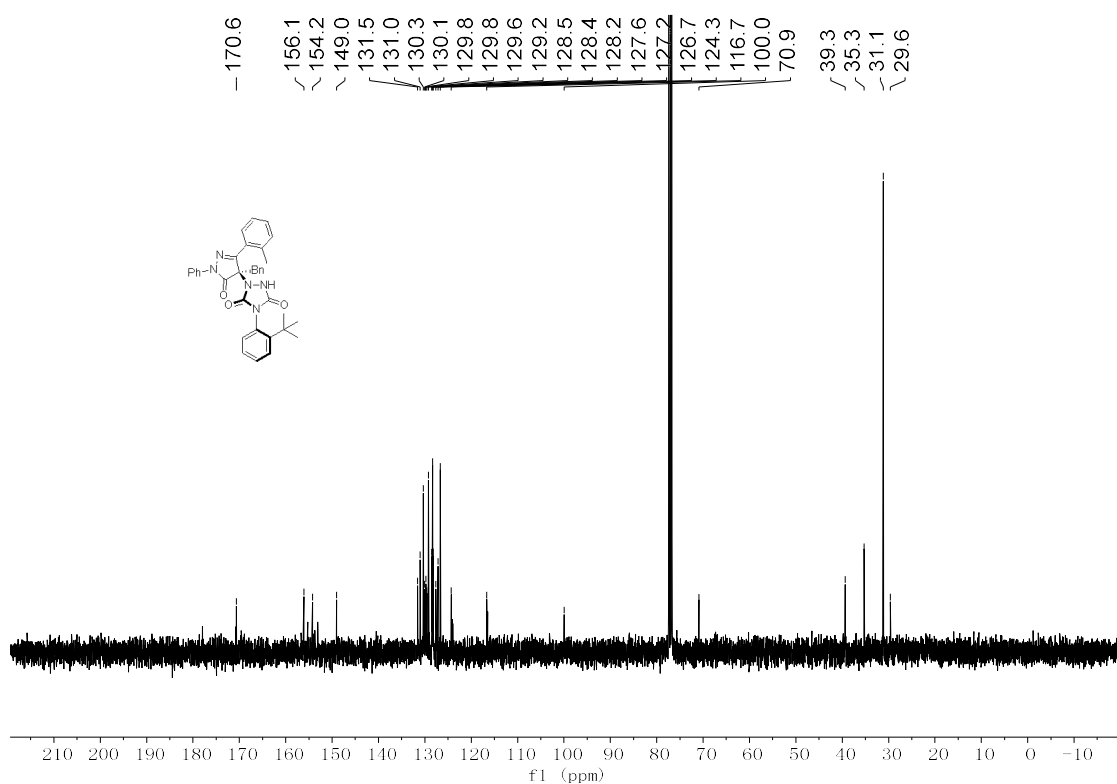

### <sup>1</sup>H NMR spectra of **3ma**

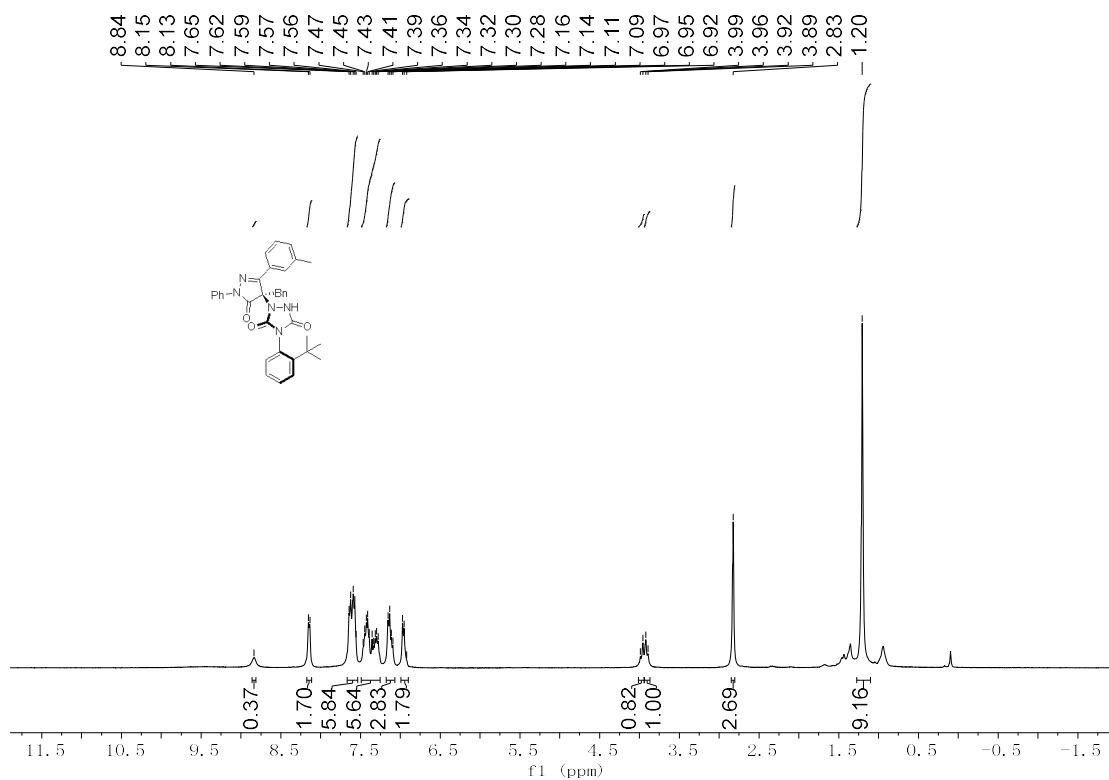

### <sup>13</sup>C NMR spectra of **3ma**

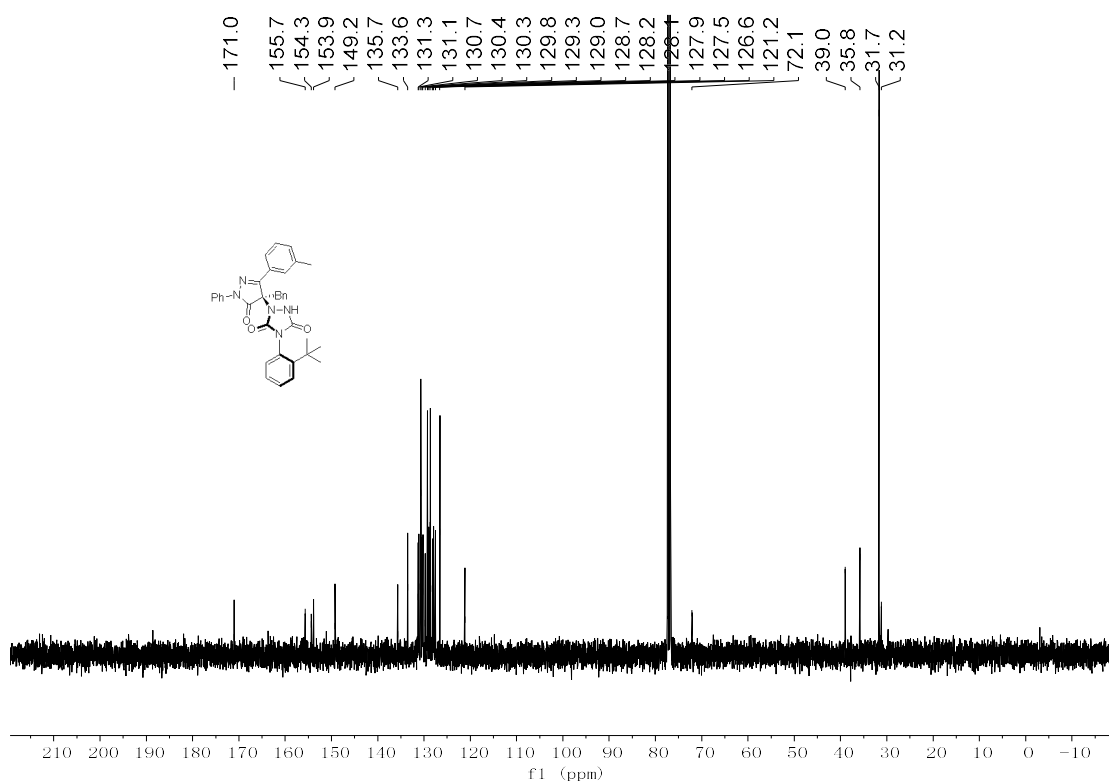

### <sup>1</sup>H NMR spectra of **3na**

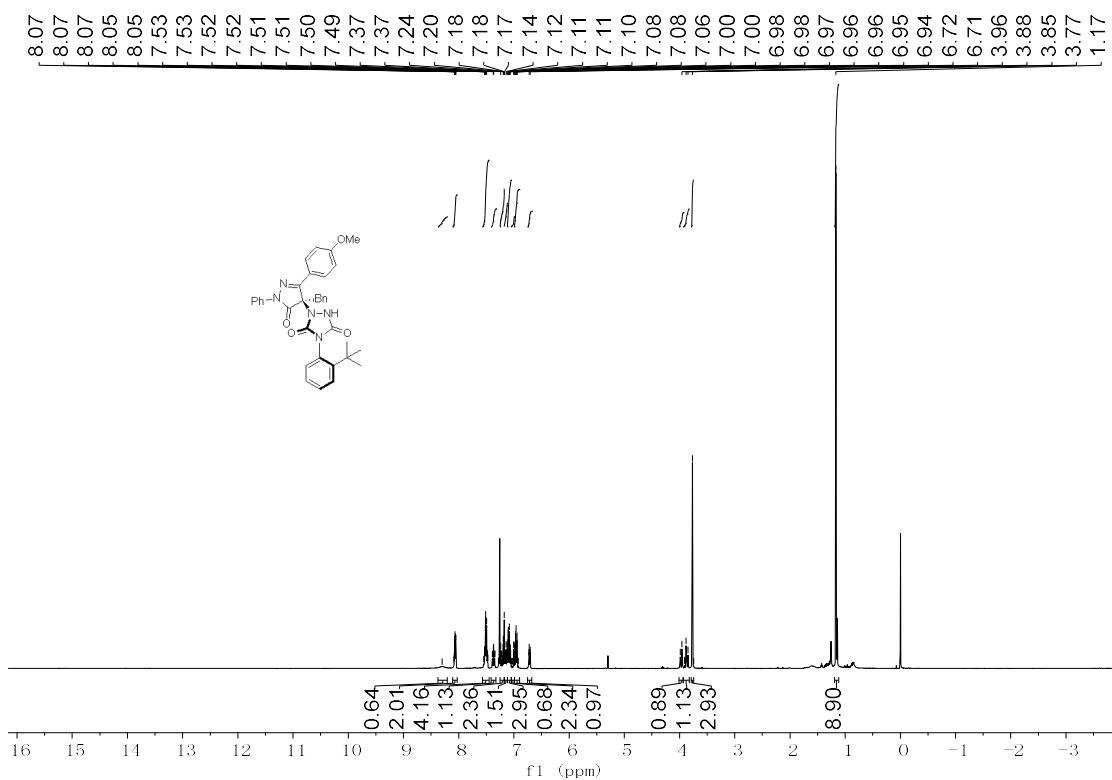

### <sup>13</sup>C NMR spectra of **3na**

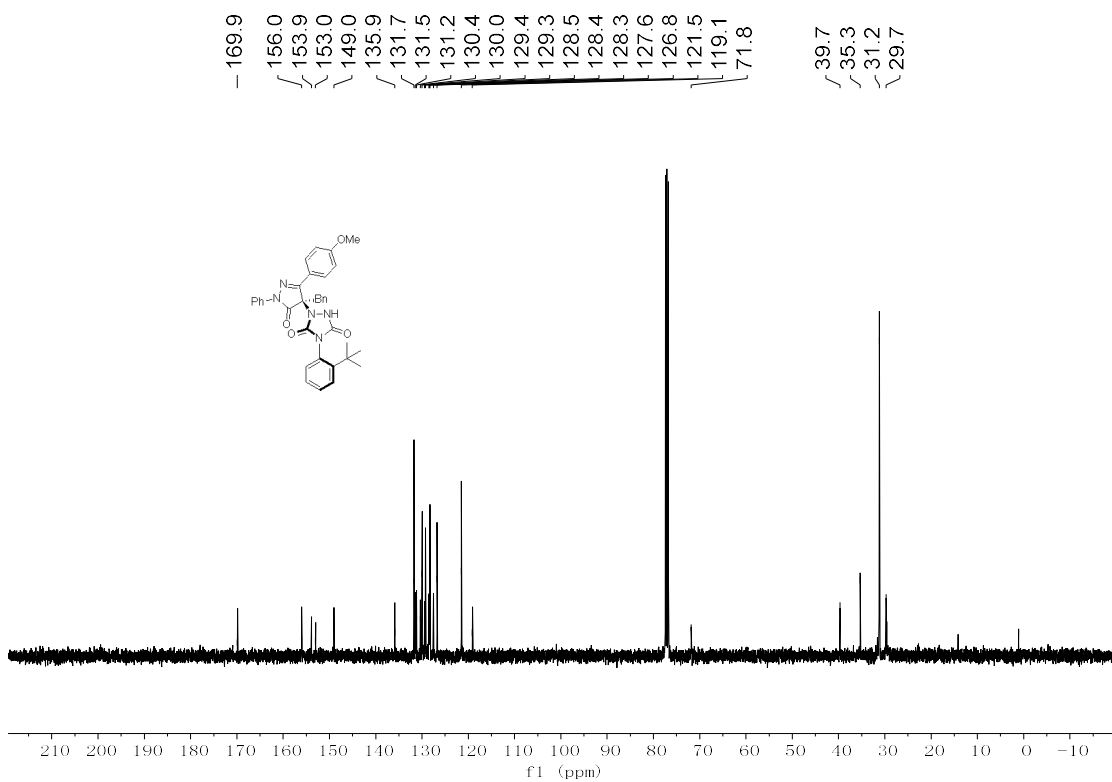

### <sup>1</sup>H NMR spectra of **30a**

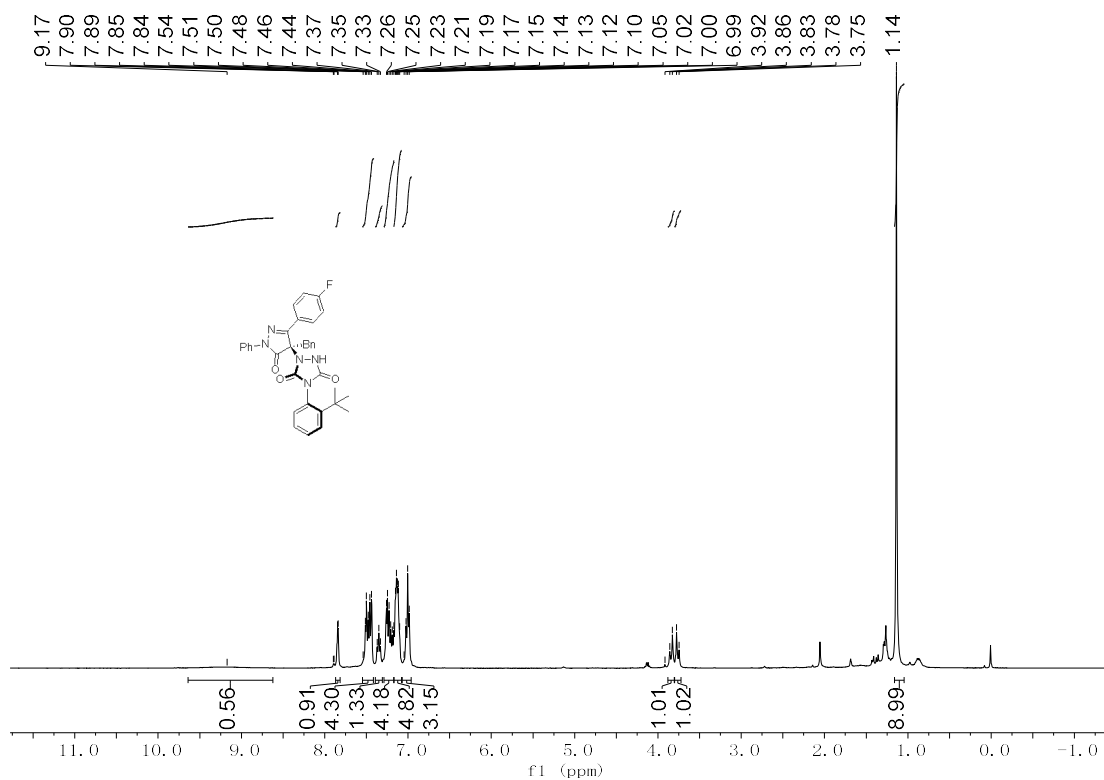

### <sup>13</sup>C NMR spectra of **30a**

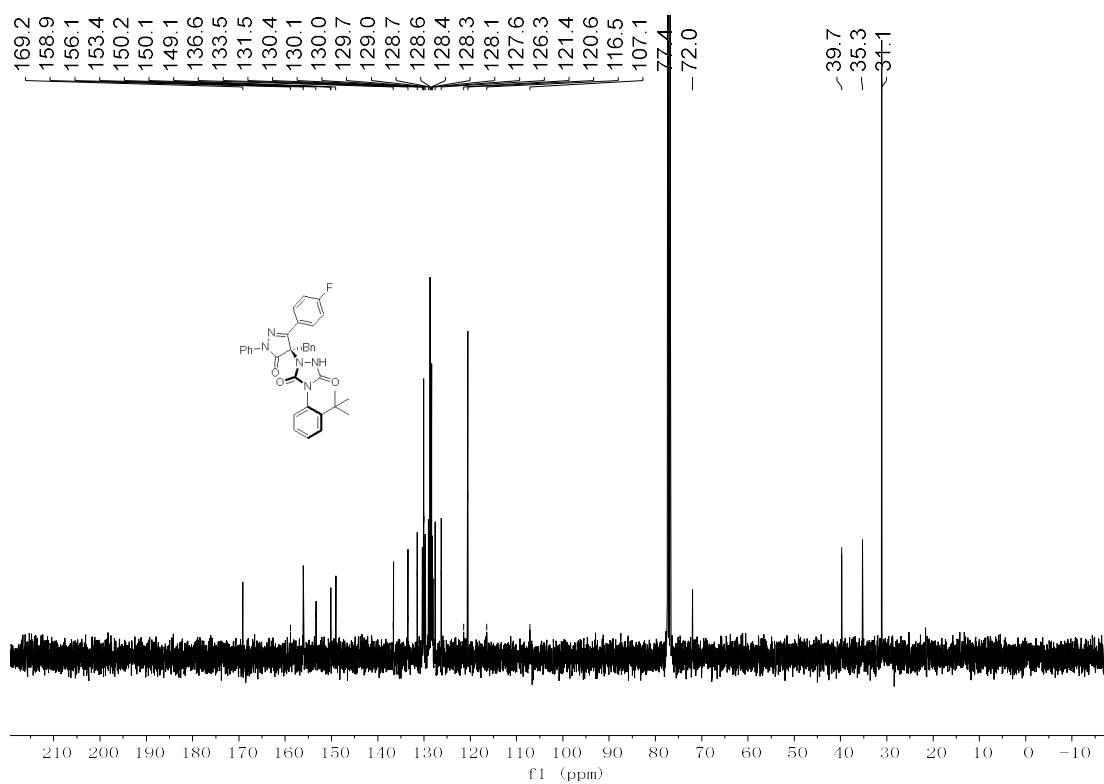

### <sup>19</sup>F NMR spectra of **30a**

--109.22

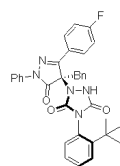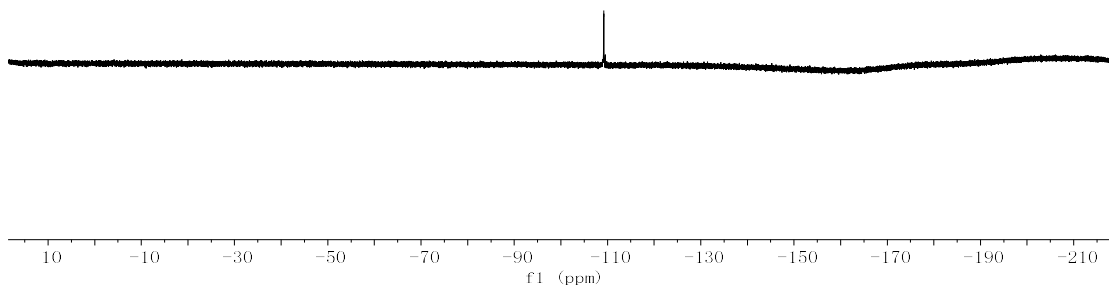



### <sup>1</sup>H NMR spectra of **3qa**

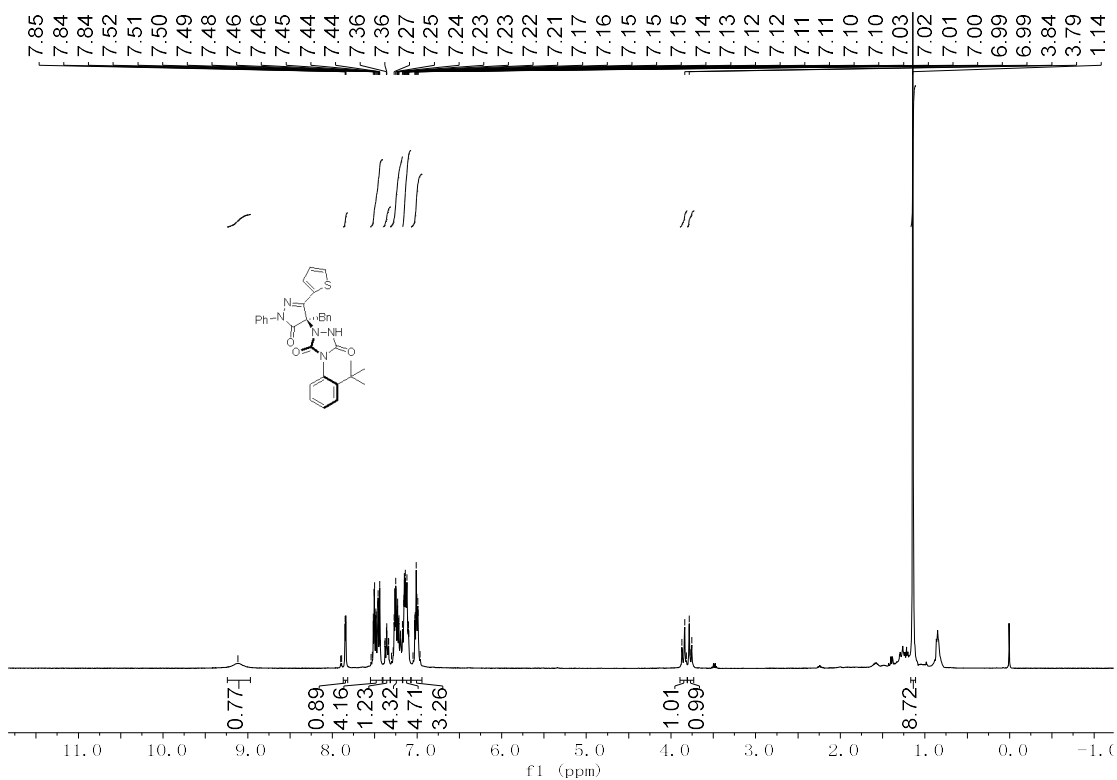

### <sup>13</sup>C NMR spectra of **3qa**

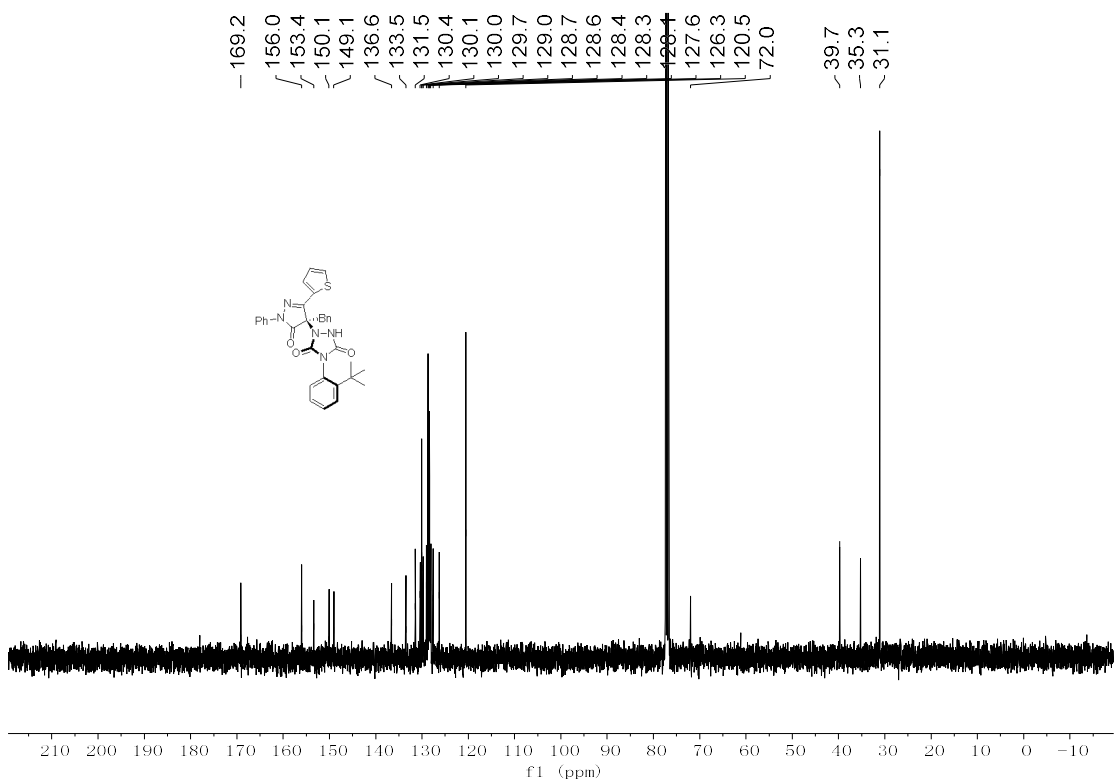

### <sup>1</sup>H NMR spectra of **3ra**

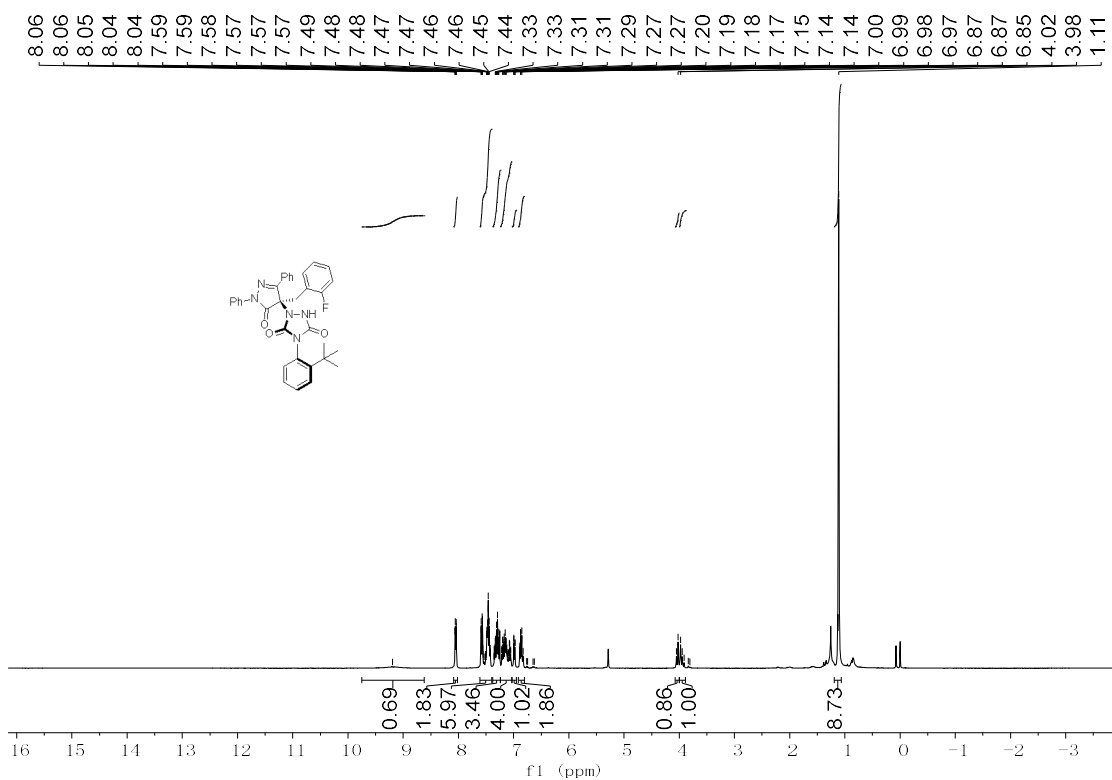

### <sup>13</sup>C NMR spectra of **3ra**

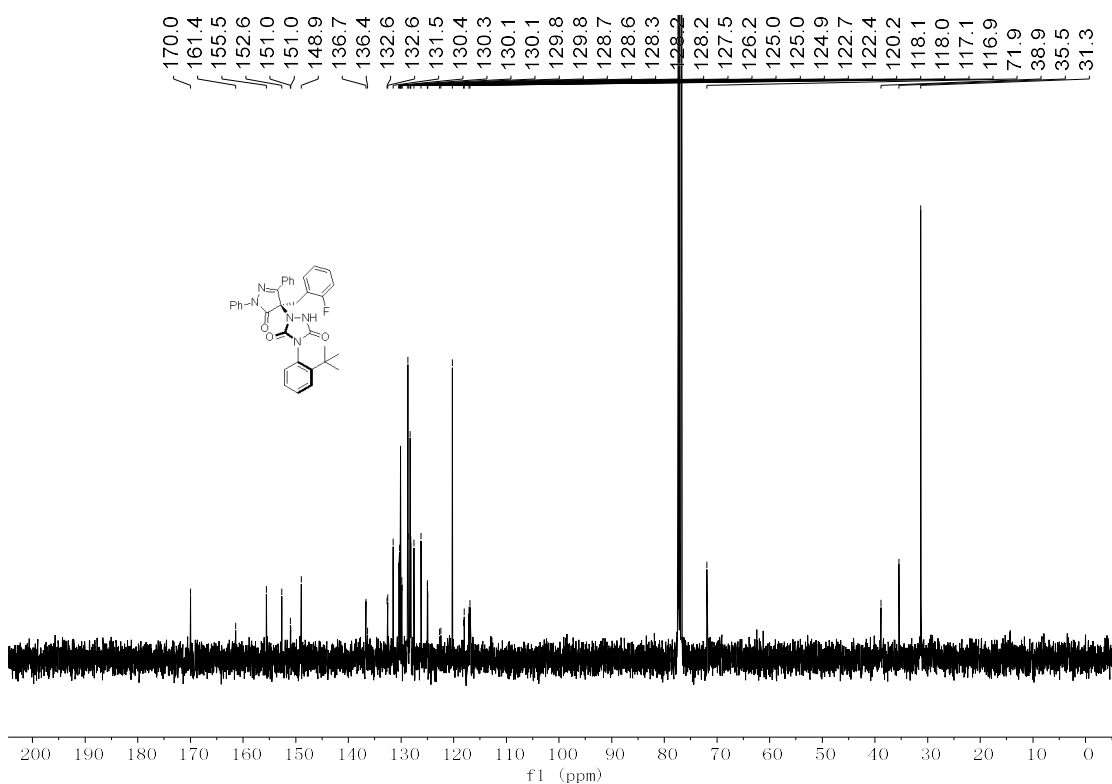

### <sup>19</sup>F NMR spectra of **3ra**

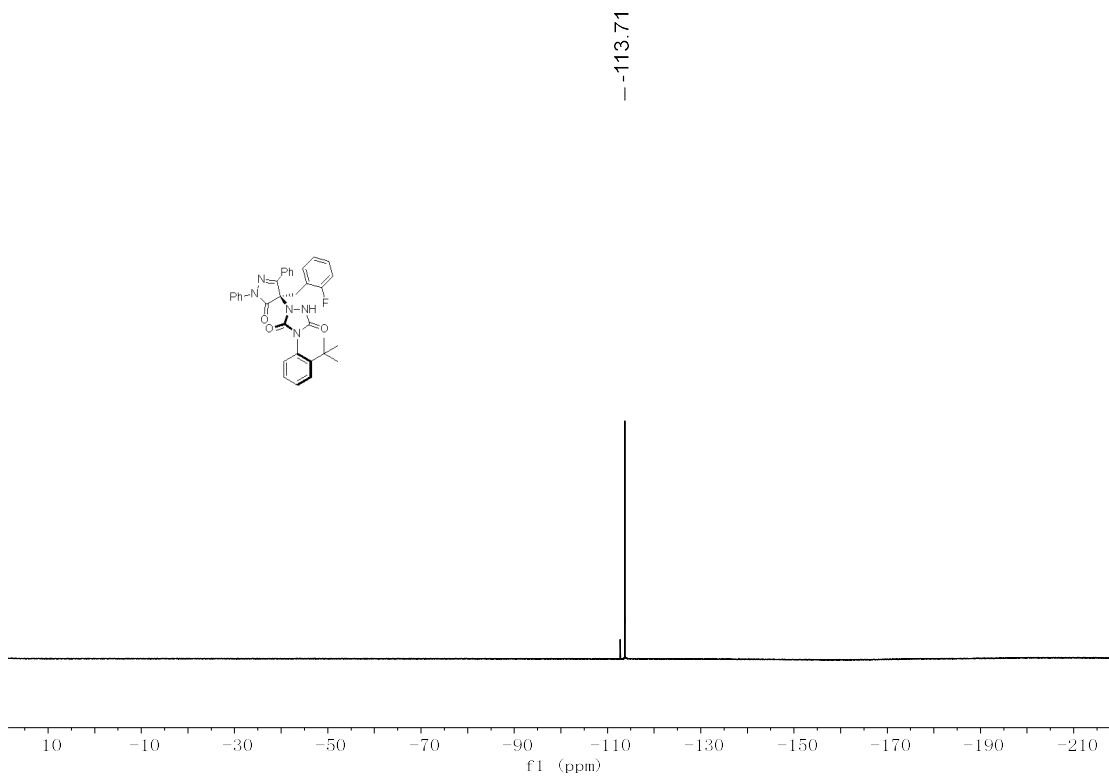

### <sup>1</sup>H NMR spectra of **3sa**

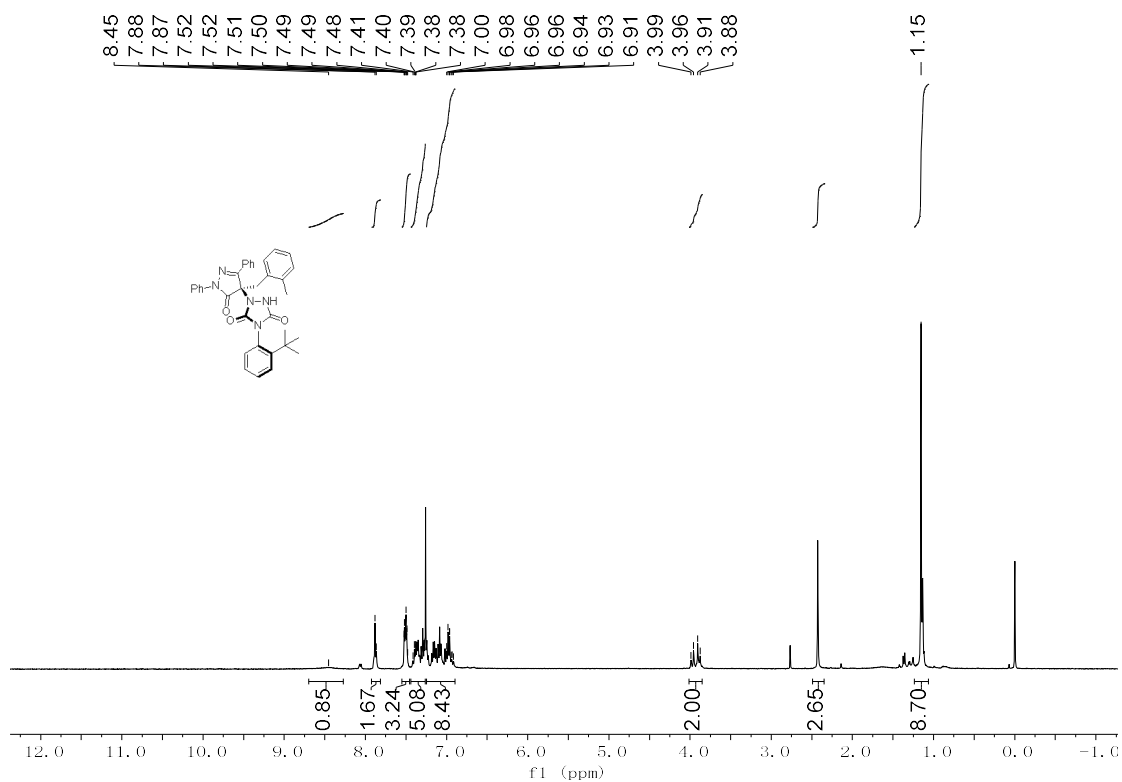

### <sup>13</sup>C NMR spectra of **3sa**

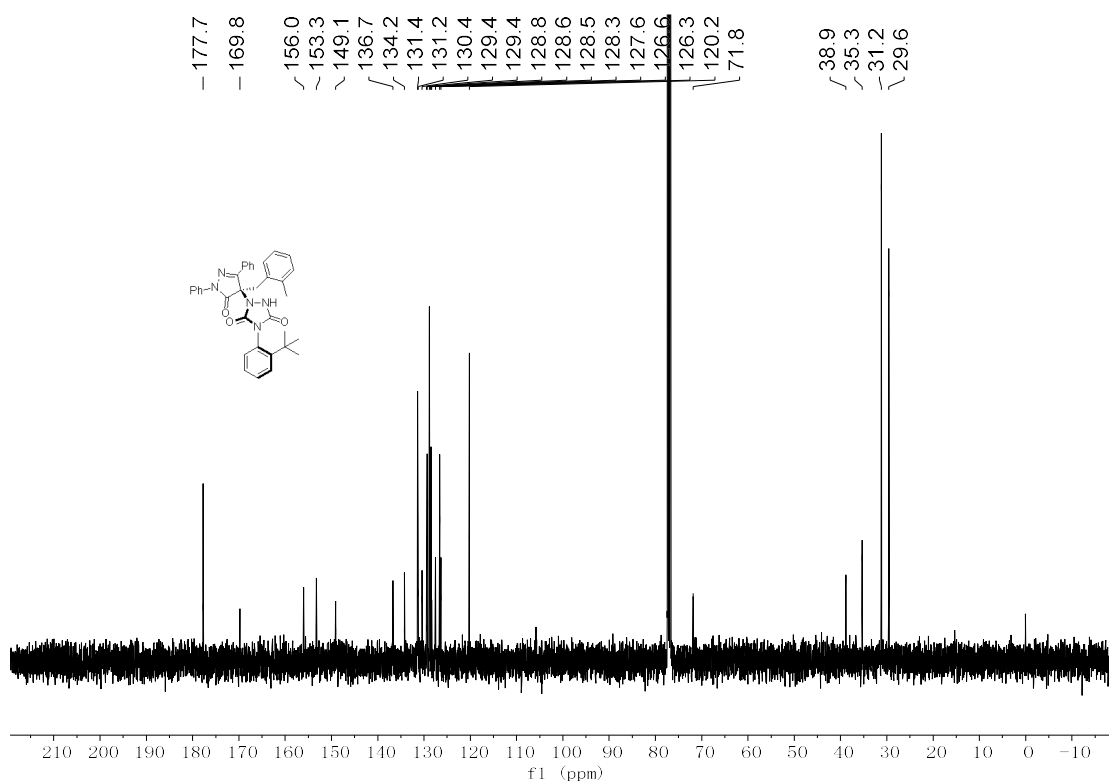

### <sup>1</sup>H NMR spectra of 3ta

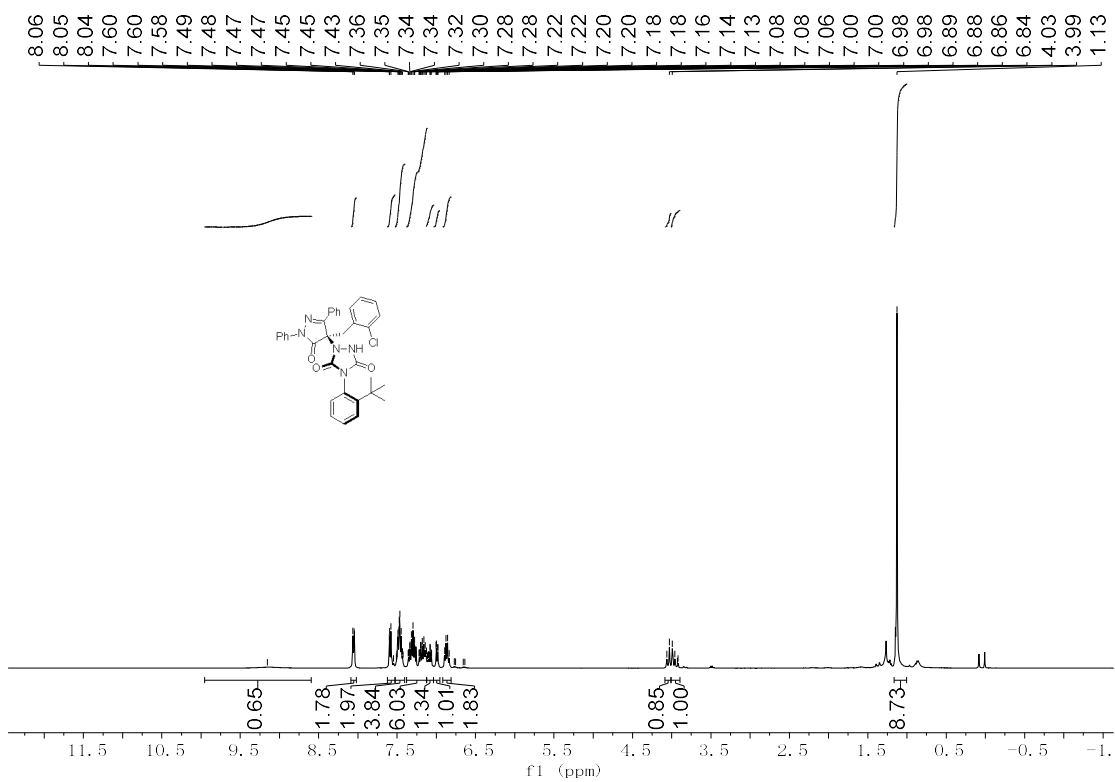

### <sup>13</sup>C NMR spectra of 3ta

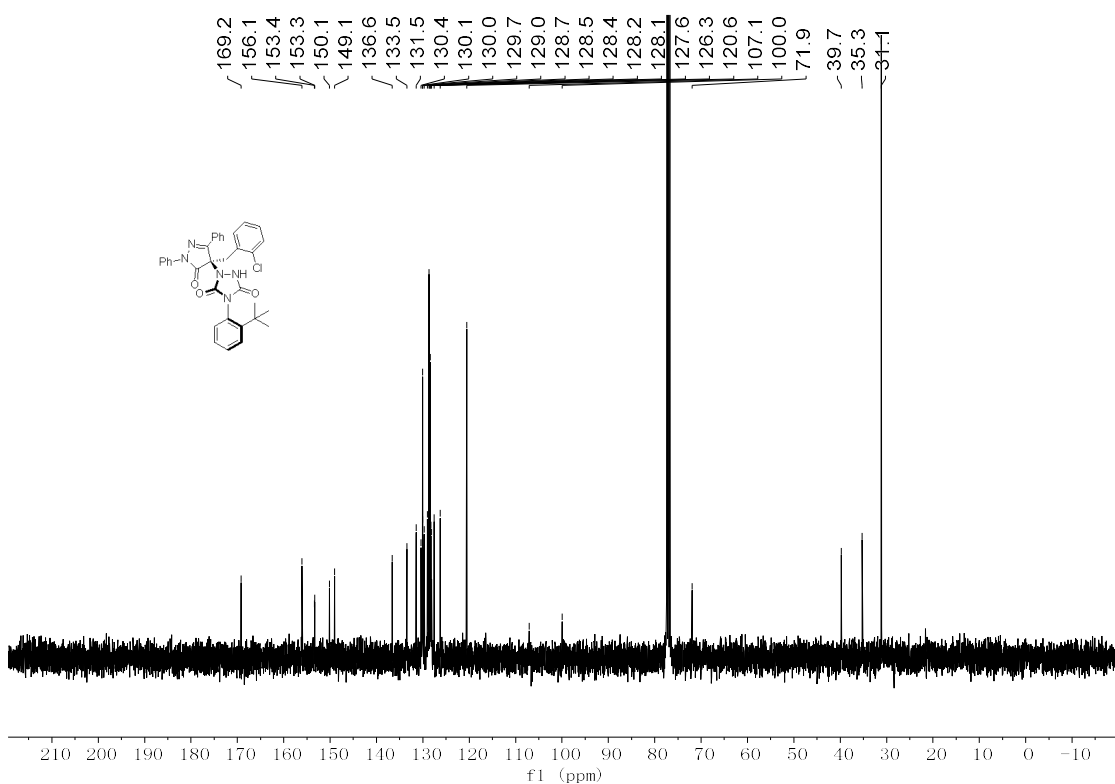

### <sup>1</sup>H NMR spectra of **3ua**

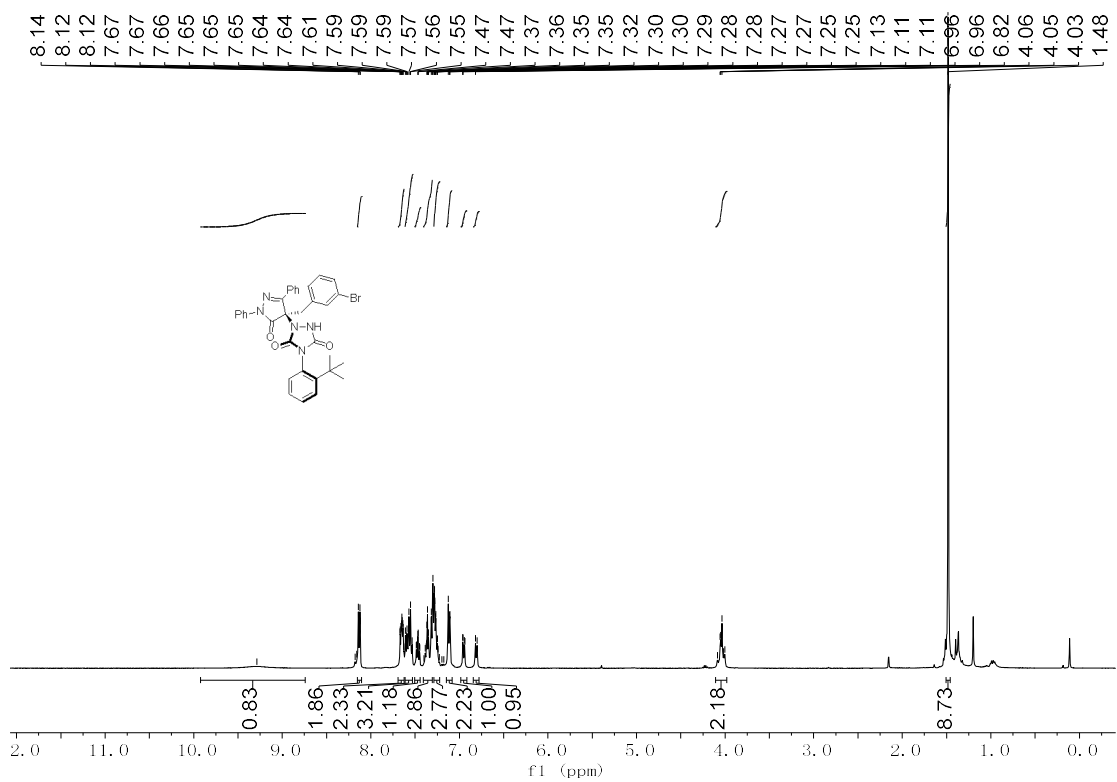

### <sup>13</sup>C NMR spectra of **3ua**

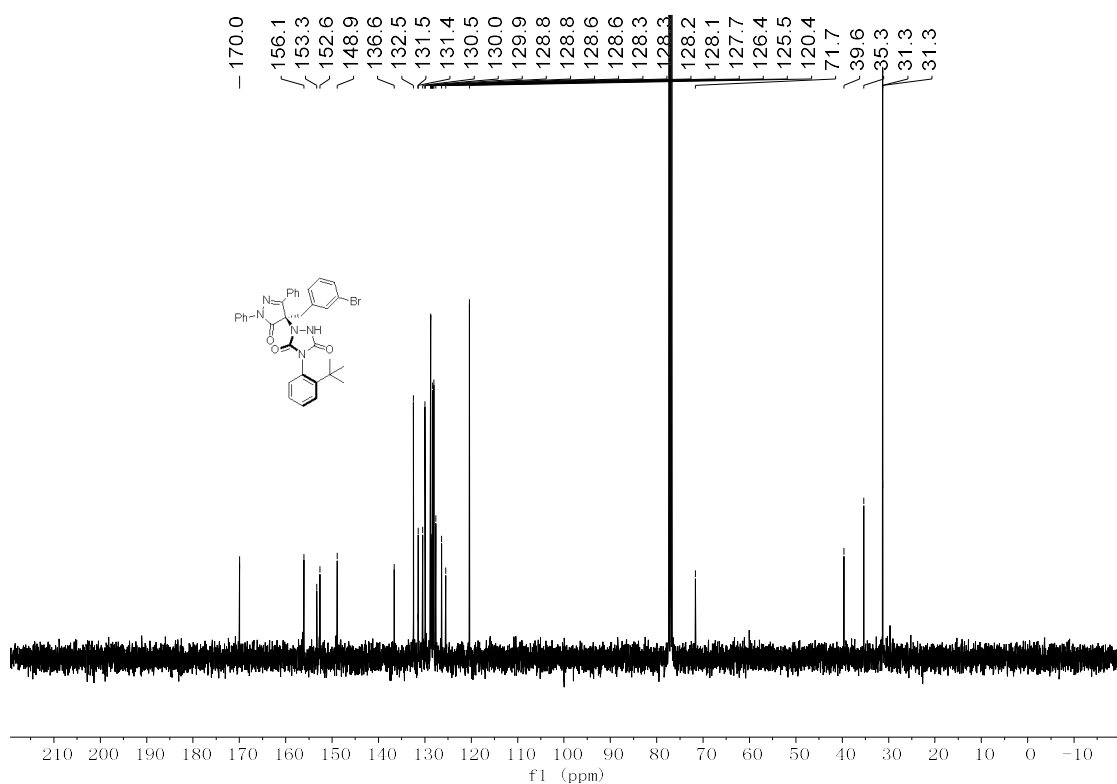



### <sup>1</sup>H NMR spectra of **3wa**

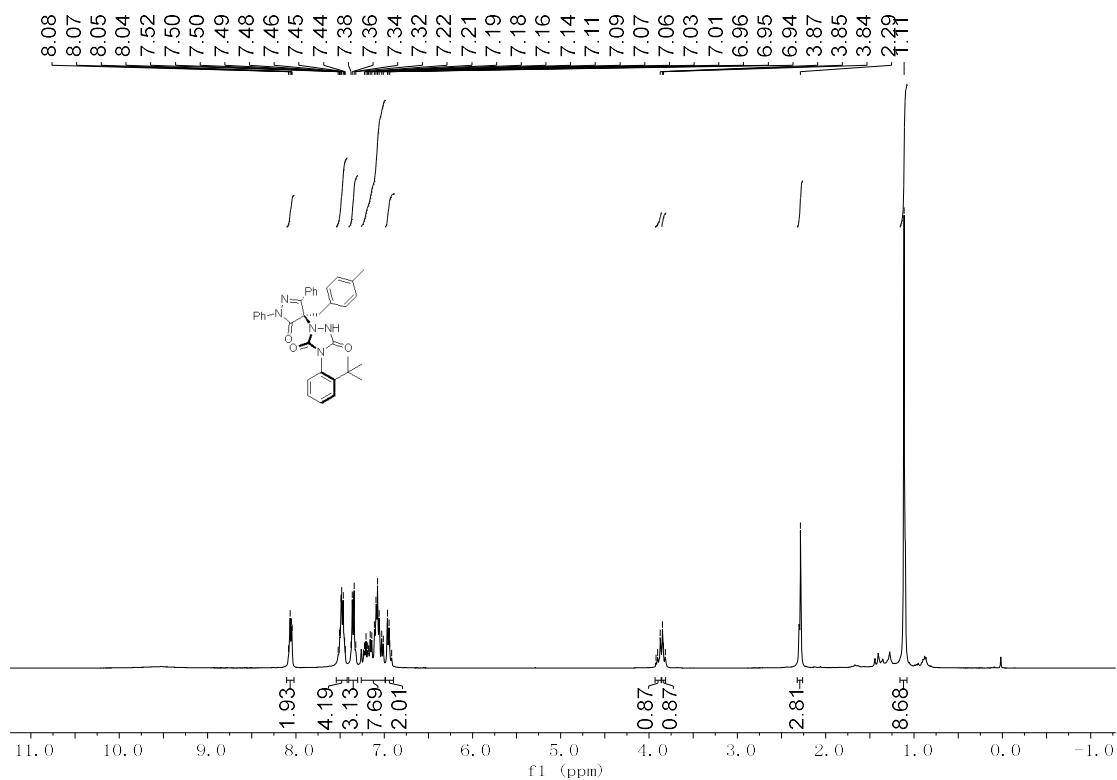

### <sup>13</sup>C NMR spectra of **3wa**

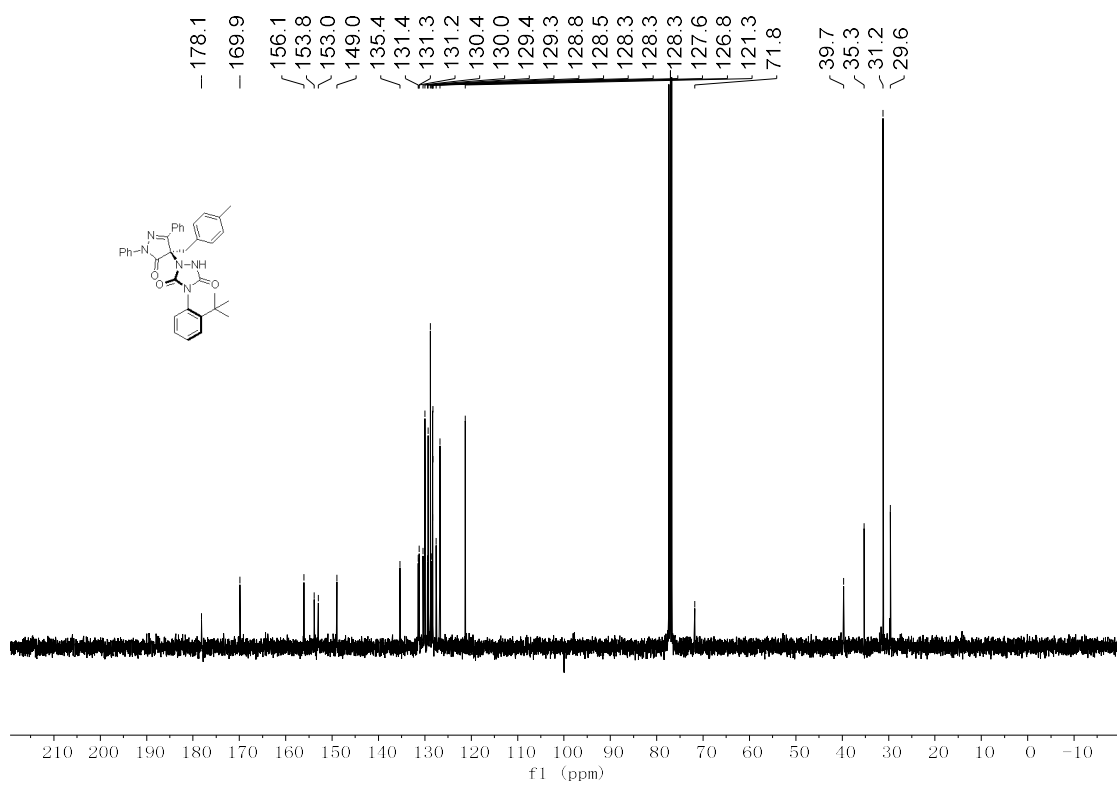

### <sup>1</sup>H NMR spectra of **3xa**

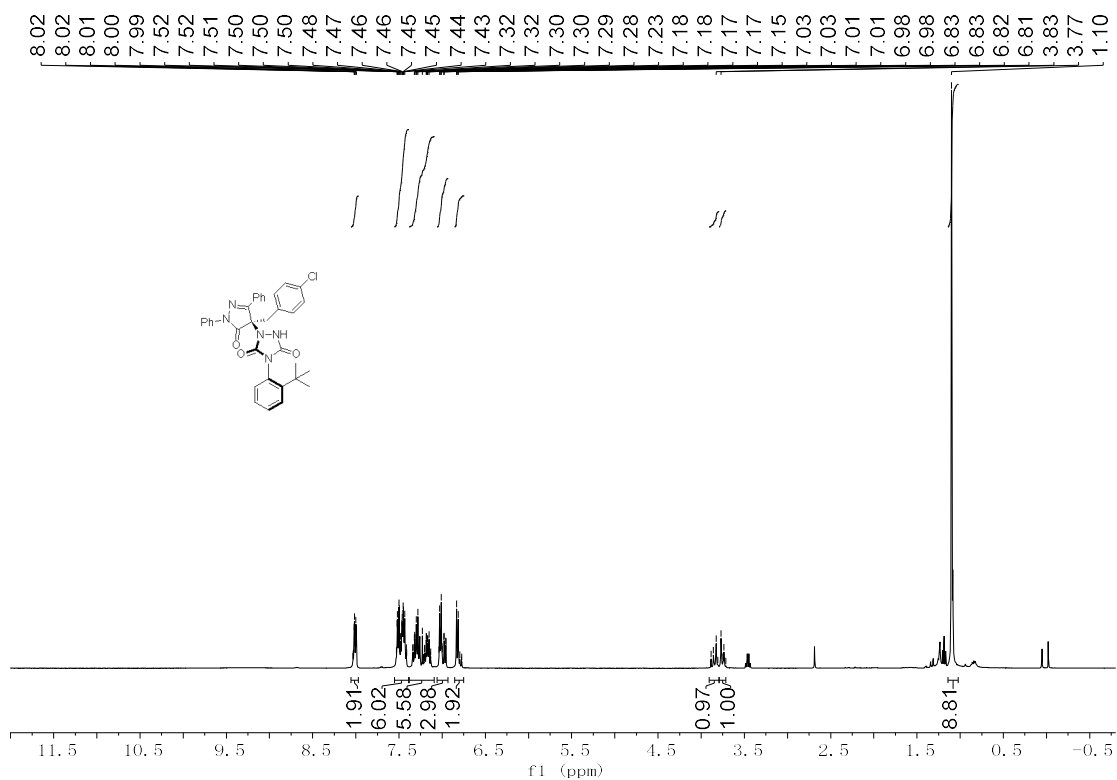

### <sup>13</sup>C NMR spectra of **3xa**

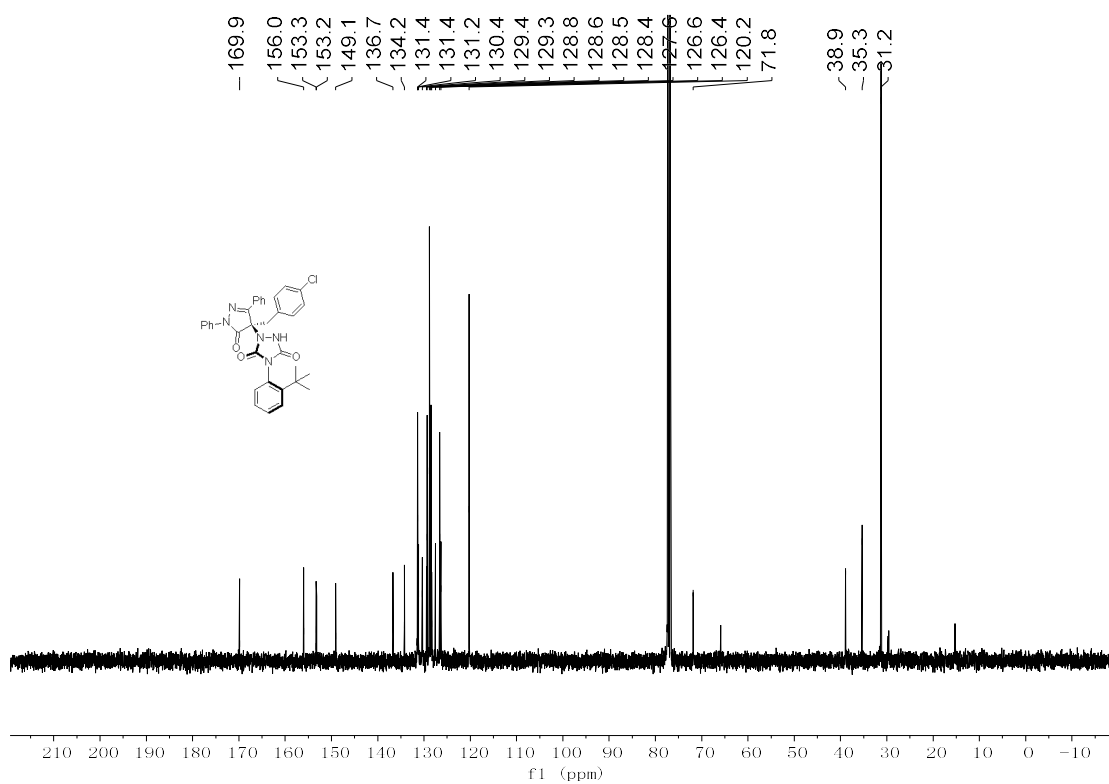

### <sup>1</sup>H NMR spectra of **3ya**

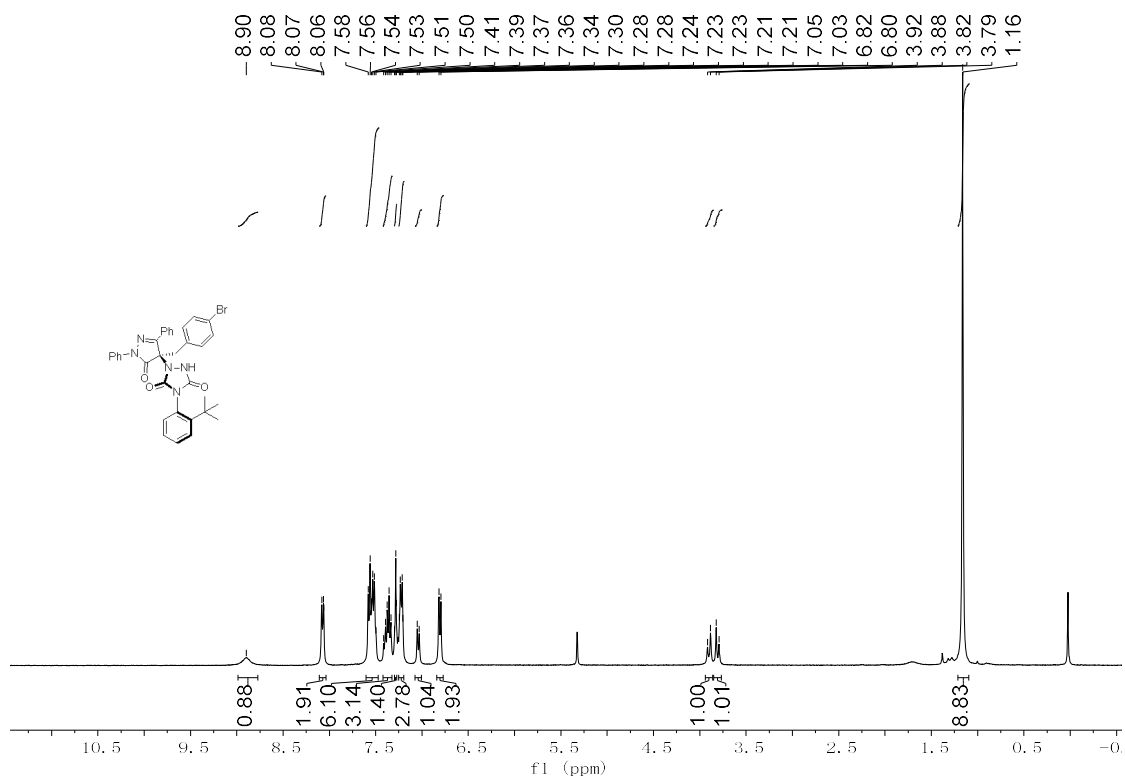

### <sup>13</sup>C NMR spectra of **3ya**

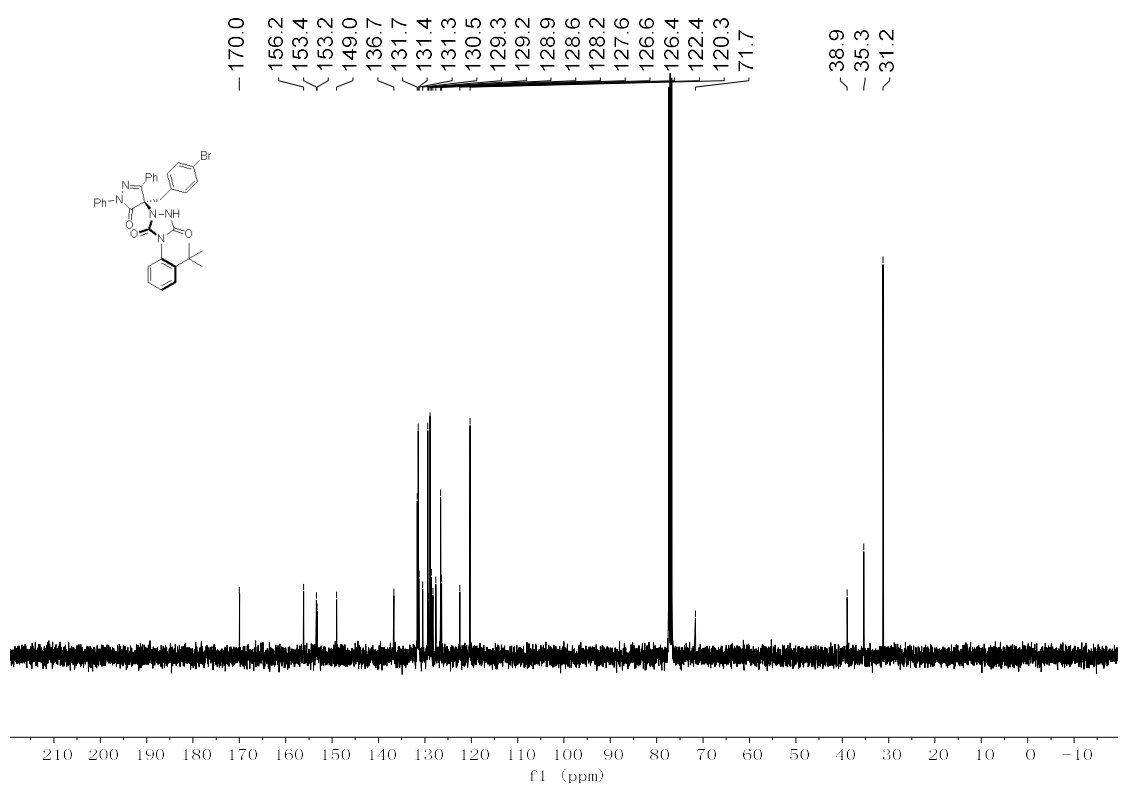

### <sup>1</sup>H NMR spectra of **3za**

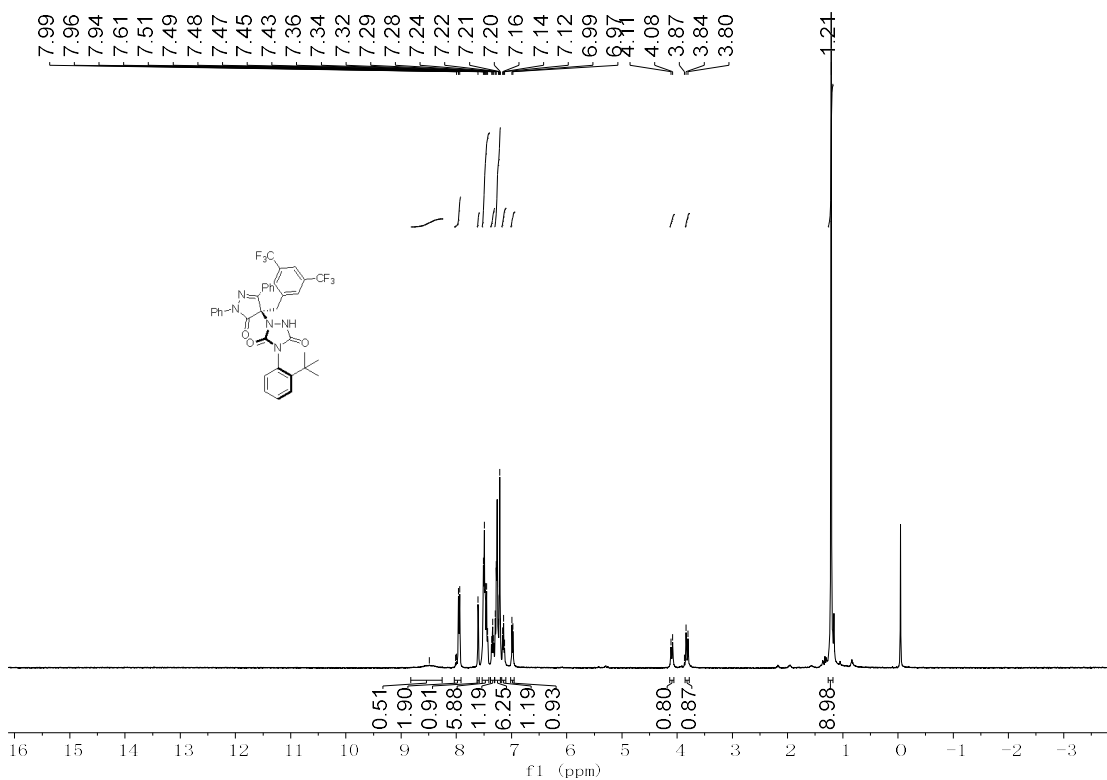

### <sup>13</sup>C NMR spectra of **3za**

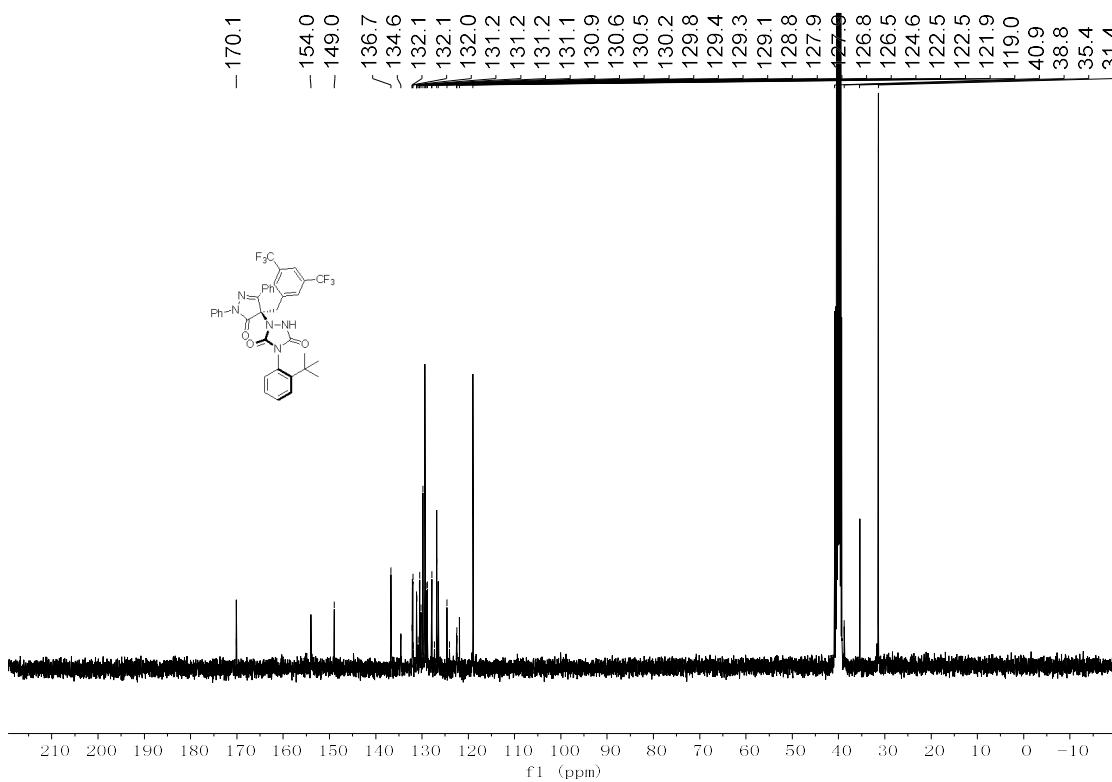

### <sup>19</sup>F NMR spectra of **3za**

-63.14

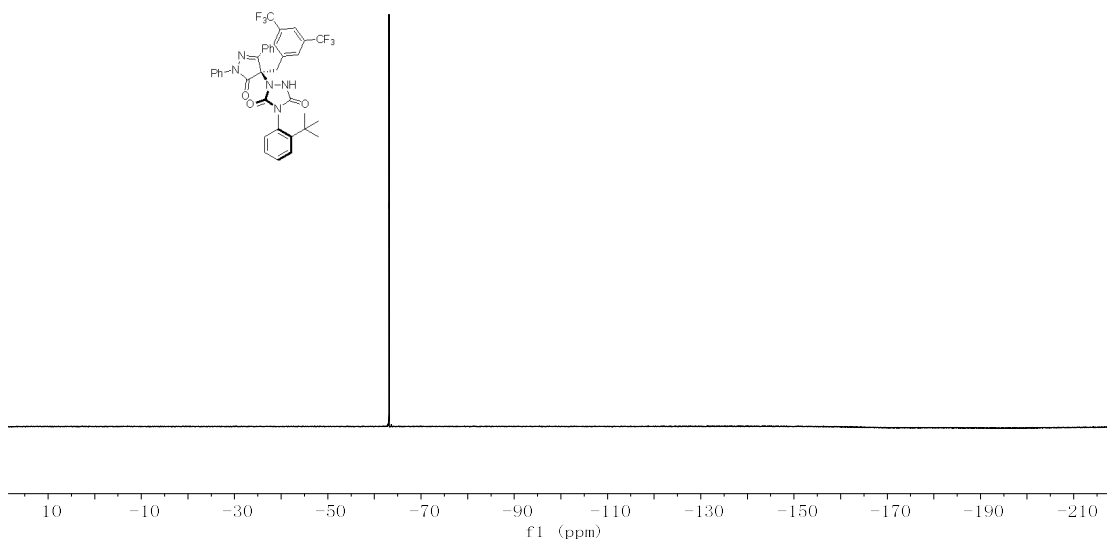

### <sup>1</sup>H NMR spectra of **3ab**

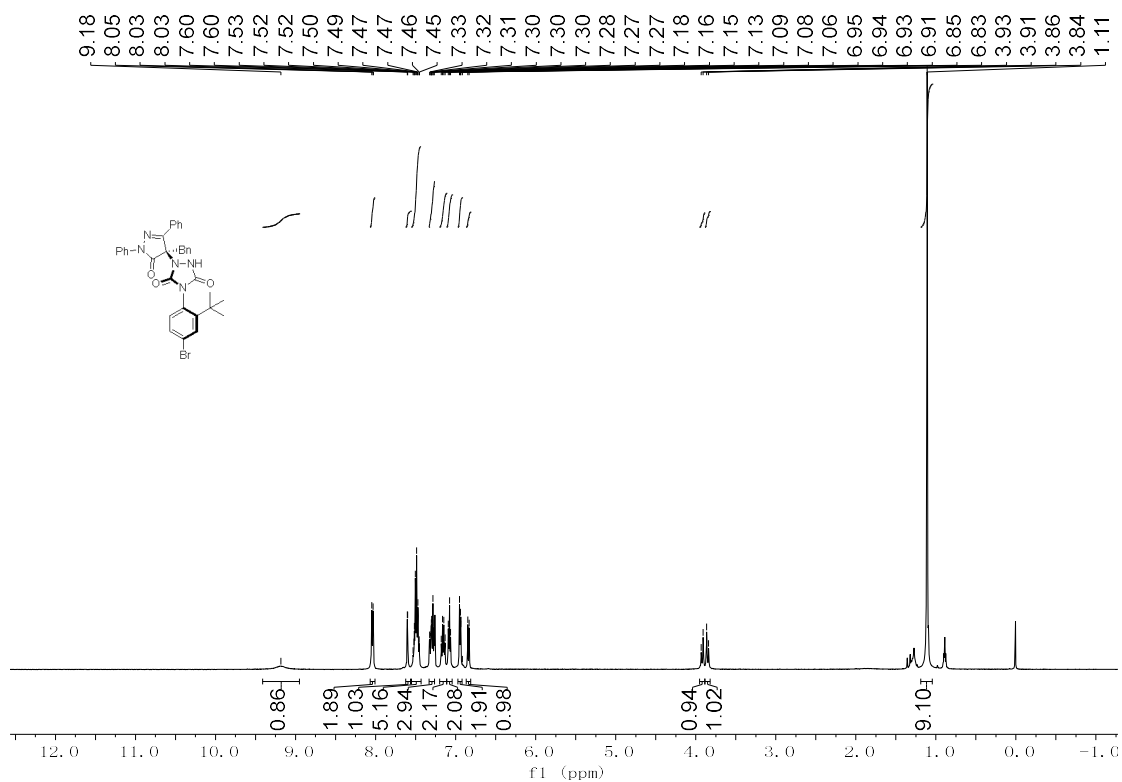

### <sup>13</sup>C NMR spectra of **3ab**

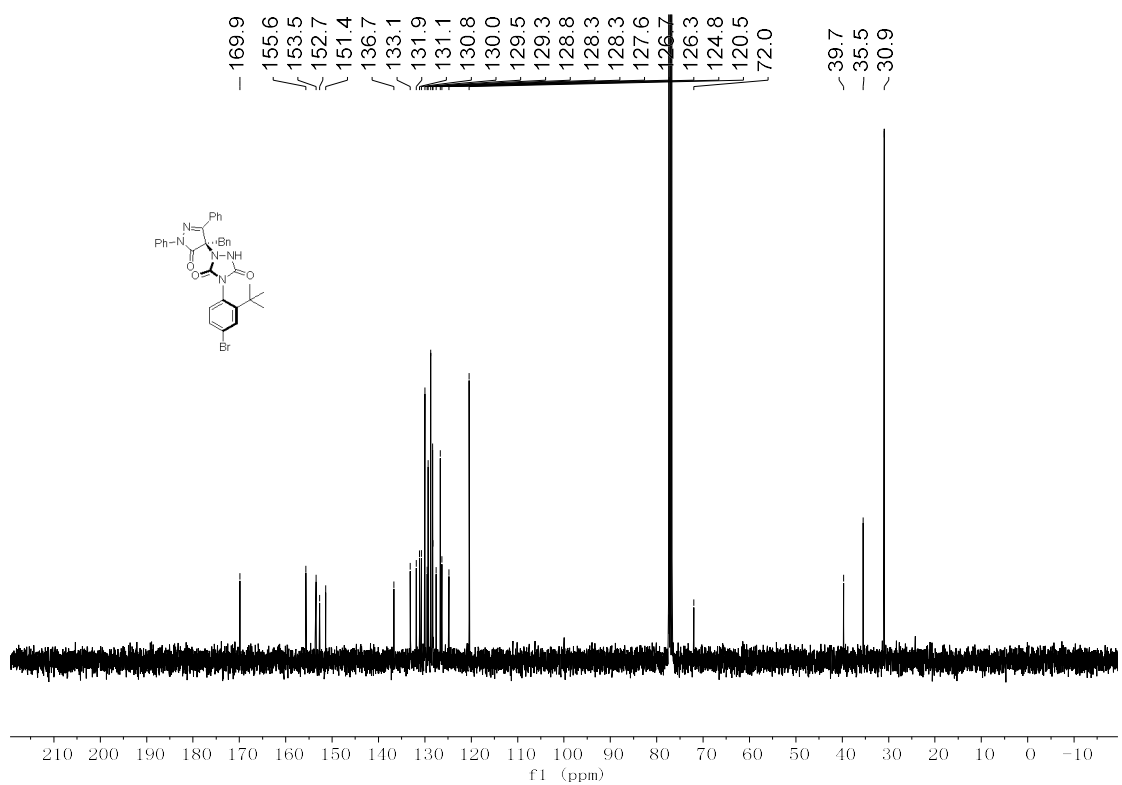

### <sup>1</sup>H NMR spectra of **3ac**

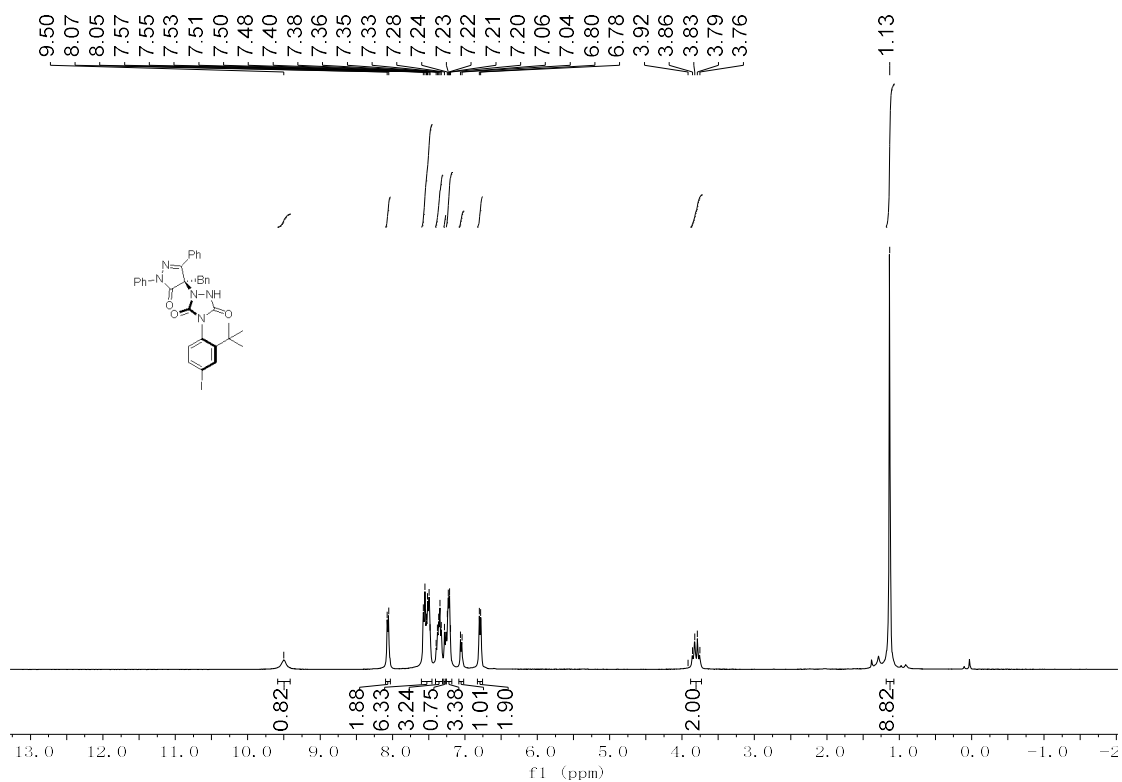

### <sup>13</sup>C NMR spectra of **3ac**

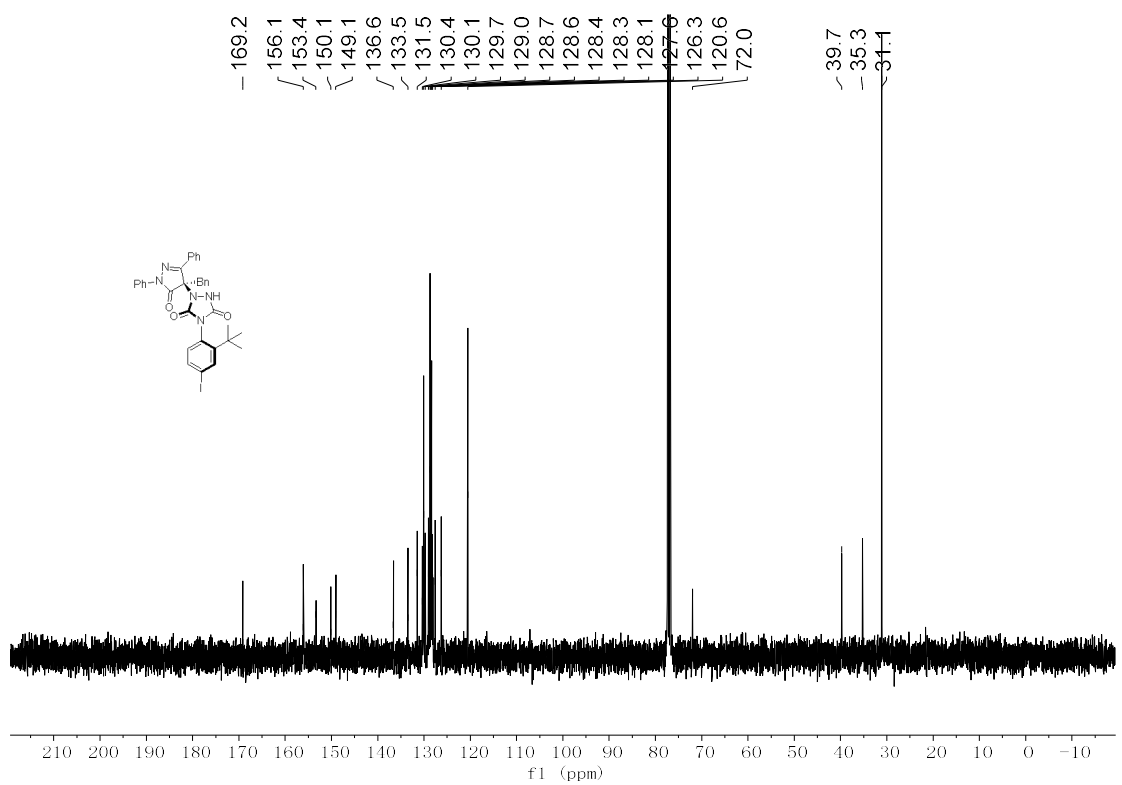



## 7. X-ray crystal structure of 3xa.

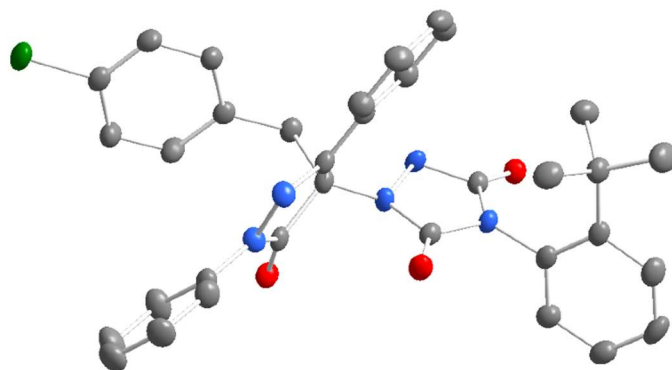

**CCDC: 2526445**

Bond precision: C-C = 0.0038 Å Wavelength=0.71073  
Cell: a=8.5157(11) b=12.5173(16) c=13.9114(17)  
alpha=90.342(3) beta=91.011(4) gamma=97.382(4)  
Temperature: 120 K

|                        | Calculated       | Reported         |
|------------------------|------------------|------------------|
| Volume                 | 1470.3(3)        | 1470.3(3)        |
| Space group            | P -1             | P-1              |
| Hall group             | -P 1             | -P 1             |
| Moiety formula         | C34 H31 Cl N5 O3 | C34 H31 Cl N5 O3 |
| Sum formula            | C34 H31 Cl N5 O3 | C34 H31 Cl N5 O3 |
| Mr                     | 593.09           | 593.09           |
| Dx, g cm <sup>-3</sup> | 1.340            | 1.340            |
| Z                      | 2                | 2                |
| Mu (mm <sup>-1</sup> ) | 0.175            | 0.175            |
| F000                   | 622.0            | 622.0            |
| F000'                  | 622.53           |                  |
| h, k, lmax             | 10, 15, 17       | 10, 15, 17       |
| Nref                   | 6126             | 6038             |
| Tmin, Tmax             | 0.983, 0.983     | 0.604, 0.745     |
| Tmin'                  | 0.983            |                  |

Correction method= # Reported T Limits: Tmin=0.604 Tmax=0.745 AbsCorr = NONE  
Data completeness= 0.986 Theta(max)= 26.543  
R(reflections)= 0.0576( 4326) wR2(reflections)= 0.1554( 6038)  
S = 1.051 Npar= 391
